# Supplementary material
Source: publisher site journal article supplement (https://www.dovepress.com/get_supplementary_file.php?f=402503.xlsx)
Supplement: Supplementary file 1 [file get_supplementary_file.php]

## Sheet: Table S1
A list of 149 alkaloids and terpenoids from THH
No.	Name	Molecular formula
1	(-)-ent-isolariciresinol	C20H24O6
2	(+)-catechin	C15H14O6
3	(+)-Catechin-5-O-glucoside	C21H24O11
4	(+)-Epicatechin	C15H14O6
5	(+)-gallocatechin-hexacetate	C15H14O6
6	(+)-syringaresinol	C22H26O8
7	11-O-β-D-glucopyranosyl-neotritophenolide	C27H36O9
8	1α-acetoxy-6β,9β-dibenzoyloxy-4β-hydroxy-dihydroagarofuran	C31H36O8
9	1β- benzoyloxy-9α-cinnamoyloxy-4-hydroxy-6α-nicotinoyloxy-β-dihydroagarofuran	C37H39NO8
10	1β,9α-dibenzoyloxy-4- hydroxy-6α-nicotinoyloxy-β-dihydroagarofuran	C35H37NO8
11	1β,9α-dibenzoyloxy-4-hydroxy-6α-nicotinoyloxy-β-dihydroagarofuran	C35H37NO8
12	1β-acetoxy-9α-benzoyloxy-4-hydroxy-6α-nicotinoyloxy-β-dihydroagarofuran	C30H35NO8
13	1β-benzoyl-8α-cinnamoyl-4α,5α-dihydroxydihydroagarofuran	C31H36O7
14	1β-benzoyloxy-9α-cinnamoyloxy-4-hydroxy-6α-nicotinoyloxy-β-dihydroagarofuran	C37H39NO8
15	2,3-dihydroxy-6-oxo-D:A-froedo-24 nor-1,3,5 (10),7-oleanatetraen-29-oic acid	C29H38O5
16	23-nor-oxopristimerol	C28H36O5
17	29-hydroxyfriedelan-3-one	C30H50O2
18	2-O-deacetyleuonine	C36H45NO17
19	3-epikatonic acid	C30H48O4
20	3-epikatonic acid methyl ester	C31H50O3
21	3-hydroxy-D:A-friedoolean-3-en-2-on-29-oic acid	C30H46O4
22	3-O-acetyloleanolic acid	C32H50O4
23	3-oxofriedelan-29-oicacid methylester	C31H50O3
24	3-Oxo-olean-12-en-28-oic acid	C30H46O3
25	3-oxo-olean-12-en-29-oicacid	C30H46O3
26	3-oxo-oleanoic acid	C30H46O3
27	3-oxo-olean-Δ9(11),12-diene	C30H46O
28	3-pyridinecarboxylic acid	C30H35NO8
29	3β,22α-dihydroxy-△12-oleanen-29-oic acid methyl ester	C31H50O4
30	3β,22α-dihydroxy-△12-ursen-29-oic acid	C31H50O4
31	3β-acetoxyolean-12-en-28-oicacid	C32H50O4
32	3β-acetoxy-urs-12-ene-28-oic acid	C30H50O4
33	9α-cinnamoyloxy-1β-furoyloxy-4-hydroxy-6α-nicotinoyloxy-β-dihydroagarofuran	C35H37NO9
34	Abrusgenic acid	C30H48O4
35	cangorinine E-I	C43H49NO18
36	cangoronin	C30H44O5
37	canophyllal	C30H48O2
38	celabenzine	C23H29N3O2
39	celafurine	C21H27N3O3
40	celastolide	C30H46O5
41	celastrol	C29H38O4
42	demethylregelin	C30H46O4
43	demethylzeylasteral	C29H36O6
44	emodin	C15H10O5
45	ent-kauran-16β/19-diol	C20H34O2
46	epigallocatechin	C15H14O7
47	euonymine	C38H47NO18
48	evonine	C36H43NO17
49	forrestine	C43H49NO18
50	friedelin	C30H50O
51	glut-5-en-3β,28-diol	C30H50O2
52	hypodiol	C30H50O2
53	hypodiolide A	C20H30O3
54	hypoepistephanine	C36H36N2O6
55	hypoglaside A	C36H48O11
56	hypoglaulide	C30H44O3
57	hypoglaunine	C41H47NO20
58	hypoglaunine A	C41H47NO20
59	hypoglaunine B	C41H47NO20
60	hypoglaunine C	C43H49NO19
61	hypoglaunine D	C41H47NO19
62	hypoglaunine E	C39H45NO19
63	hypoglaunine F	C39H45NO19
64	hypoglauterpenic acid	C30H46O3
65	hypolide	C20H24O3
66	hyponine A	C41H47NO19
67	hyponine B	C41H47NO19
68	hyponine C	C43H49NO18
69	hyponine D	C47H50N2O18
70	hyponine E	C45H48N2O19
71	hyponine F	C41H47NO19
72	integracin B	C35H54O7
73	mesembryanthemoidigenic acid	C30H48O4
74	neoeunoymine	C36H45NO17
75	neotriptophenolide	C21H26O4
76	oleanoic acid 3-O-acetate	C32H50O4
77	oleanolic acid	C30H48O3
78	orthosphenic acid	C30H48O5
79	peritassine A	C38H47NO18
80	polpunonic acid	C30H48O3
81	populnilic acid	C30H48O4
82	Procyanidin B1	C30H26O12
83	Procyanidin B4	C30H26O12
84	quinone 21	C20H22O4
85	regelin	C31H48O4
86	salaspermic acid	C30H48O4
87	totarol	C20H30O
88	tripdiolide	C20H24O7
89	Tripdiotolnide	C20H24O7
90	tripfordine C	C36H45NO17
91	tripterolide	C20H24O7
92	triptinin a	C21H28O3
93	triptinin B	C20H26O3
94	triptobenzene A	C20H28O3
95	triptobenzene D	C20H26O2
96	triptobenzene H	C21H28O4
97	triptobenzene J	C20H30O3
98	triptobenzene K	C20H22O5
99	triptobenzene L	C22H34O3
100	triptocallic acid C	C30H48O4
101	triptocallic acid D	C30H48O4
102	triptoditerpenic acid	C21H28O4
103	triptoditerpenic acid B	C21H28O3
104	triptofordin a	C33H38O11
105	triptohypol A	C30H40O6
106	triptohypol B	C30H40O5
107	triptohypol C	C29H40O4
108	triptohypol D	C32H54O2
109	triptohypol E	C32H52O2
110	triptohypol F	C31H52O2
111	triptolide	C20H24O6
112	Triptolidenol	C20H24O7
113	triptonediol	C21H30O4
114	triptonide	C20H22O6
115	triptonine A	C45H55NO21
116	triptonine B	C45H55NO22
117	triptonoditerpenic acid	C21H28O4
118	triptonolide	C20H22O4
119	triptonoterpene	C20H28O2
120	triptonoterpene methyl ether	C21H30O3
121	triptonoterpenol	C21H30O4
122	triptophenolide	C20H24O3
123	triptoquinone A	C20H24O4
124	triptoquinone B	C20H26O4
125	triptoquinone H	C20H26O3
126	Triptotin A	C20H22O6
127	triptotriterpenic acid A	C30H48O4
128	triptotriterpenic acid C	C30H48O4
129	Triptotriterpenic acid C	C30H48O4
130	triptotriterpenicacid a'	C30H14O6
131	triptriolide	C20H26O7
132	wilfordine	C43H49NO19
133	wilfordinine A	C36H45NO17
134	wilfordinine B	C38H47NO19
135	wilfordinine C	C43H49NO19
136	wilforgine	C41H47NO19
137	wilforic acid A	C29H42O4
138	wilforic acid C	C30H48O4
139	wilforidine	C36H45NO18
140	wilforine	C43H49NO18
141	wilforlide A	C30H46O3
142	wilforlide B	C30H44O3
143	wilformine	C38H47NO18
144	wilfornine	C42H48N2O18
145	wilforol B	C29H38O4
146	wilfortrine	C41H47NO20
147	wilforzine	C41H47NO17
148	Wilfotrine	C41H47NO20
149	Wilsonine	C20H25NO4

## Sheet: Table S2
A list of 479 genes linked to 18 compounds
Compound	Gene
(+)-Catechin	PTGS1
(+)-Catechin	ESR1
(+)-Catechin	PTGS2
(+)-Catechin	HSP90AA1
(+)-Catechin	PRKACA
(+)-Catechin	NCOA2
(+)-Catechin	CALM1
(+)-Catechin	RXRA
(+)-Catechin	HAS2
(+)-Catechin	HSP90AB1
(+)-Catechin	HSP90AA1
(+)-Catechin	Chain A, 2
(+)-Catechin	OPRK1
(+)-Catechin	OPRD1
(+)-Catechin	PTGS1
(+)-Catechin	POLB
(+)-Catechin	FEN1
(+)-Catechin	euchromatic histone
(+)-Catechin	POLH
(+)-Catechin	F2
(+)-Catechin	MITF
(+)-Catechin	AKR1B10
(+)-Catechin	APP
(+)-Catechin	NTMT1
(+)-Epicatechin	PTGS1
(+)-Epicatechin	ESR1
(+)-Epicatechin	PTGS2
(+)-Epicatechin	HSP90AA1
(+)-Epicatechin	PRKACA
(+)-Epicatechin	OPRD1
(+)-Epicatechin	PTGS1
(+)-Epicatechin	OPRM1
(+)-Epicatechin	OPRK1
(+)-Epicatechin	BACE1
Celabenzine	DRD4
Celabenzine	OPRM1
Celabenzine	HTR2A
Celabenzine	OPRK1
Celabenzine	SLC6A4
Celabenzine	CCR5
Celabenzine	SLC6A3
Celabenzine	EPHX2
Celabenzine	EGFR
Celabenzine	ADRA1A
Celabenzine	ADRA1B
Celabenzine	CHRNA4 CHRNB2
Celabenzine	ADRA1D
Celabenzine	OPRD1
Celabenzine	CTSB
Celabenzine	PRCP
Celabenzine	THRB
Celabenzine	MC4R
Celabenzine	SLC6A2
Celabenzine	ACACA
Celabenzine	ACACB
Celabenzine	DPP4
Celabenzine	CAPN1
Celabenzine	P2RX7
Celabenzine	EP300
Celabenzine	TACR1
Celabenzine	HSD11B1
Celabenzine	DRD2
Celabenzine	DRD3
Celabenzine	IKBKB
Celabenzine	MMP8
Celabenzine	CCR3
Celabenzine	PGGT1B FNTA
Celabenzine	SIGMAR1
Celabenzine	ITGA2B ITGB3
Celabenzine	F2
Celabenzine	KCNH2
Celabenzine	F10
Celabenzine	MLYCD
Celabenzine	LGMN
Celabenzine	CHRM4
Celabenzine	GABRB3 GABRG2 GABRA1
Celabenzine	GABRB3 GABRG2 GABRA5
Celabenzine	MAPKAPK2
Celabenzine	PDE10A
Celabenzine	TNKS2
Celabenzine	TNKS
Celabenzine	CYP27A1
Celabenzine	MTOR
Celabenzine	PIK3CA
Celabenzine	ADORA1
Celabenzine	SCD
Celabenzine	L3MBTL3
Celabenzine	CYP11B2
Celabenzine	PARP3
Celabenzine	GPBAR1
Celabenzine	PARP4
Celabenzine	L3MBTL1
Celabenzine	BAZ2B
Celabenzine	CECR2
Celabenzine	BAZ2A
Celabenzine	CCR1
Celabenzine	CHRM2
Celabenzine	CREBBP
Celabenzine	UTS2R
Celabenzine	TACR2
Celabenzine	PPIA
Celabenzine	PLA2G2A
Celabenzine	MAPK8
Celabenzine	SYK
Celabenzine	ABCC1
Celabenzine	PDE5A
Celabenzine	APP
Celabenzine	ABCG2
Celabenzine	MET
Celabenzine	CHRM1
Celabenzine	PDE4D
Celabenzine	MAPK13
Celabenzine	GRM1
Celabenzine	TGFBR1
Celabenzine	AURKB
Celabenzine	AURKA
Celabenzine	ACHE
Celabenzine	CFD
Celabenzine	PSMB5
Celabenzine	MAPK14
Celabenzine	CRHR1
Celabenzine	RPS6KA3
Celabenzine	CHRNB1 CHRNA1 CHRNG CHRND
Celabenzine	KCNK3
Celabenzine	NTRK1
Celabenzine	SLC6A15
Celabenzine	H1F0
Celabenzine	CPA1
Celabenzine	F7
Celabenzine	DUT
Celabenzine	HNMT
Celabenzine	CYP11B1
Celabenzine	PRKDC
Celabenzine	PANK3
Celafurine	F2
Celafurine	ADAM17
Celafurine	AGTR2
Celafurine	AKR1C3
Celafurine	AURKA
Celafurine	AURKB
Celafurine	BDKRB2
Celafurine	BRD2
Celafurine	BRD3
Celafurine	BRD4
Celafurine	BRS3
Celafurine	CA1
Celafurine	CA2
Celafurine	CALCRL
Celafurine	CASP3
Celafurine	CASP7
Celafurine	CCR5
Celafurine	CDC7
Celafurine	CDK1
Celafurine	CDK2
Celafurine	CDK4
Celafurine	CDK5R1 CDK5
Celafurine	CDK8
Celafurine	CHRNA4
Celafurine	CLK4
Celafurine	CREBBP
Celafurine	CRHR1
Celafurine	CSNK1D
Celafurine	DBF4 CDC7
Celafurine	DYRK1A
Celafurine	F2RL3
Celafurine	FKBP1A
Celafurine	FNTA FNTB
Celafurine	GABRA5
Celafurine	GCK
Celafurine	GPR55
Celafurine	GRIA2
Celafurine	GRM1
Celafurine	GRM5
Celafurine	GSK3B
Celafurine	GSTO1
Celafurine	HCRTR1
Celafurine	HCRTR2
Celafurine	HRH3
Celafurine	HRH4
Celafurine	IMPDH2
Celafurine	JAK1
Celafurine	JAK2
Celafurine	JAK3
Celafurine	KCNA3
Celafurine	KCNA5
Celafurine	KCNQ2
Celafurine	KDR
Celafurine	KIF11
Celafurine	LCK
Celafurine	LRRK2
Celafurine	MAPK10
Celafurine	MAPK11
Celafurine	MAPK13
Celafurine	MAPK8
Celafurine	MDM2
Celafurine	MET
Celafurine	MTOR
Celafurine	NAAA
Celafurine	NPY5R
Celafurine	NQO2
Celafurine	PDE10A
Celafurine	PDE3A
Celafurine	PDE3B
Celafurine	PDE4B
Celafurine	PDE8B
Celafurine	PDE9A
Celafurine	PDGFRB
Celafurine	PFKFB3
Celafurine	PIK3C3
Celafurine	PIK3CA
Celafurine	PIK3CB
Celafurine	PIK3CD
Celafurine	PIK3CG
Celafurine	PLA2G7
Celafurine	PRKCD
Celafurine	PRKCG
Celafurine	PRKCQ
Celafurine	PRKDC
Celafurine	PROKR1
Celafurine	PSEN2 PSENEN NCSTN APH1A PSEN1 APH1B
Celafurine	PTGER3
Celafurine	PTGES
Celafurine	PYGL
Celafurine	RHOA
Celafurine	RORC
Celafurine	SCN9A
Celafurine	SLC1A3
Celafurine	SLC27A1
Celafurine	SLC6A5
Celafurine	STS
Celafurine	TAF1
Celafurine	TAF1L
Celafurine	TNK2
Celafurine	TRPV1
Celafurine	TYK2
Celastrol	NR3C1
Celastrol	CCND1
Celastrol	BCL2
Celastrol	BCL2L1
Celastrol	BAX
Celastrol	FLT1
Celastrol	KDR
Celastrol	MMP9
Celastrol	JUN
Celastrol	PTGS2
Celastrol	BIRC5
Celastrol	BIRC2
Celastrol	CFLAR
Celastrol	AKR1B1
Celastrol	CDC37
Celastrol	MMP2
Celastrol	TIMP1
Celastrol	TIMP2
Celastrol	MMP1
Celastrol	TP53
Celastrol	MYC
Celastrol	FSD1
Celastrol	COL7A1
Celastrol	COL4A4
Celastrol	PTGER2
Celastrol	HSF1
Celastrol	PTPN6
Celastrol	PTPN1
Celastrol	HSP90AB1
Celastrol	PTPN11
Celastrol	TERT
Celastrol	HSP90AA1
Celastrol	EWS/FLI
Celastrol	STAT3
Celastrol	YAP1
Celastrol	AR
Celastrol	RGS17
Celastrol	IFNB1
Celastrol	HLA
Celastrol	PTPN2
Celastrol	PTEN
Celastrol	CDC37
Celastrol	NR4A1
Celastrol	SARM1
Celastrol	TERT
Celastrol	PTPN11
Celastrol	HSF1
Celastrol	TLR9
Celastrol	CYP19A1
Celastrol	SHBG
Celastrol	MPEG1
Celastrol	XIAP
Celastrol	KAT2B
Celastrol	CDC25B
Celastrol	NR3C2
Celastrol	ACE
Celastrol	SAE1 UBA2
Epigallocatechin	PTGS1
Epigallocatechin	ESR1
Epigallocatechin	PTGS2
Epigallocatechin	TOP2A
Epigallocatechin	HSP90AA1
Epigallocatechin	NCOA2
Epigallocatechin	IL8RA
Epigallocatechin	UBE2N
Epigallocatechin	OPRK1
Epigallocatechin	OPRM1
Epigallocatechin	OPRD1
Epigallocatechin	ALB
Epigallocatechin	MITF
Epigallocatechin	CGAS
Epigallocatechin	CNR1
Epigallocatechin	RAD52
Hypodiolide A	NR3C2
Hypodiolide A	NR3C1
Hypodiolide A	CDC25A
Hypodiolide A	PTPN1
Hypodiolide A	HMGCR
Hypodiolide A	CYP19A1
Hypodiolide A	HSD11B1
Hypodiolide A	VDR
Hypodiolide A	HSD17B3
Hypodiolide A	SIRT2
Hypodiolide A	UGT2B7
Hypodiolide A	ACHE
Hypodiolide A	TRPV1
Hypodiolide A	SRD5A1
Hypodiolide A	OPRK1
Hypodiolide A	CCR1
Hypodiolide A	AR
Hypodiolide A	C5AR1
Hypodiolide A	PRKCA
Hypodiolide A	PRSS1
Hypodiolide A	CTRC
Hypodiolide A	EPHX2
Hypodiolide A	CYP17A1
Hypodiolide A	PSEN2 PSENEN NCSTN APH1A PSEN1 APH1B
Hypodiolide A	SHBG
Hypodiolide A	APP
Hypodiolide A	BACE1
Hypodiolide A	NR1I3
Hypodiolide A	TRPV4
Hypodiolide A	CA1
Hypodiolide A	CA9
Hypodiolide A	HIF1A
Oleanolic acid	CASP9
Oleanolic acid	CASP3
Oleanolic acid	HMOX1
Oleanolic acid	ICAM1
Oleanolic acid	NQO1
Oleanolic acid	AMY2A
Oleanolic acid	MAP4K2
Oleanolic acid	PTPN1
Oleanolic acid	POLB
Oleanolic acid	PTPN2
Oleanolic acid	PTPN6
Oleanolic acid	TDP1
Oleanolic acid	ACP1
Oleanolic acid	PTPRF
Oleanolic acid	AKR1B10
Oleanolic acid	PLA2G1B
Oleanolic acid	CDC25B
Oleanolic acid	IFNG
Oleanolic acid	PTPN11
Oleanolic acid	GPBAR1
Oleanolic acid	POLB
Oleanolic acid	PTPN1
Oleanolic acid	PTPN2
Oleanolic acid	PLA2G1B
Oleanolic acid	CDC25B
Oleanolic acid	AKR1B10
Oleanolic acid	RORC
Oleanolic acid	PTPRF
Oleanolic acid	HSD11B1
Oleanolic acid	ACP1
Oleanolic acid	PDE4D
Oleanolic acid	CD81
Oleanolic acid	PTGES
Oleanolic acid	CES2
Oleanolic acid	PTPN6
Oleanolic acid	NOS2
Oleanolic acid	FABP1
Oleanolic acid	AR
Oleanolic acid	PPARG
Oleanolic acid	PREP
Oleanolic acid	SCD
Oleanolic acid	HSD11B2
Oleanolic acid	PRKCH
Oleanolic acid	PTPN11
Oleanolic acid	FNTA FNTB
Oleanolic acid	TERT
Oleanolic acid	PTGS2
Oleanolic acid	CYP19A1
Oleanolic acid	FABP4
Oleanolic acid	PPARA
Oleanolic acid	PPARD
Oleanolic acid	SERPINA6
Oleanolic acid	SHBG
Oleanolic acid	G6PD
Oleanolic acid	CYP51A1
Oleanolic acid	CDC25A
Oleanolic acid	LTB4R
Oleanolic acid	PTGS1
Oleanolic acid	FABP3
Oleanolic acid	FABP5
Oleanolic acid	ESR2
Oleanolic acid	FAAH
Oleanolic acid	NPC1L1
Oleanolic acid	SIGMAR1
Oleanolic acid	CYP17A1
Oleanolic acid	PTGER2
Oleanolic acid	ADORA3
Oleanolic acid	MAPK3
Oleanolic acid	NR1H3
Oleanolic acid	GPBAR1
Oleanolic acid	NR3C1
Oleanolic acid	SAE1 UBA2
Oleanolic acid	SLC6A4
Oleanolic acid	CYP2C19
Oleanolic acid	TOP1
Oleanolic acid	HMGCR
Oleanolic acid	TLR9
Oleanolic acid	NR1H4
Oleanolic acid	ALOX5
Oleanolic acid	PGR
Oleanolic acid	PTGER4
Oleanolic acid	ALOX5AP
Oleanolic acid	CHRM2
Oleanolic acid	SLC6A2
Oleanolic acid	NR3C2
Oleanolic acid	GRIK1
Oleanolic acid	GRIK2
Oleanolic acid	ESR1
Oleanolic acid	FFAR1
Oleanolic acid	SRD5A2
Oleanolic acid	RORA
Oleanolic acid	BCHE
Oleanolic acid	PTGIR
Oleanolic acid	NR1I3
Oleanolic acid	CES1
Oleanolic acid	MDM2
Oleanolic acid	BACE1
Oleanolic acid	SLC6A3
Salaspermic acid	CYP19A1
Salaspermic acid	PTPN1
Salaspermic acid	TERT
Salaspermic acid	PTPN11
Salaspermic acid	HSF1
Salaspermic acid	SAE1 UBA2
Salaspermic acid	CD81
Salaspermic acid	PTPRF
Salaspermic acid	ACP1
Salaspermic acid	ACE
Salaspermic acid	PLA2G1B
Salaspermic acid	PDE4D
Salaspermic acid	AGTR1
Salaspermic acid	CDC25B
Triptinin B	CHRM3
Triptinin B	KCNH2
Triptinin B	CHRM1
Triptinin B	SCN5A
Triptinin B	CHRM5
Triptinin B	PTGS2
Triptinin B	CA2
Triptinin B	RXRA
Triptinin B	PDE3A
Triptinin B	ADRA1A
Triptinin B	PGR
Triptinin B	CHRM2
Triptinin B	ADRA1B
Triptinin B	ADRB2
Triptinin B	ADRA1D
Triptinin B	TOP2A
Triptinin B	OPRM1
Triptinin B	NR3C1
Triptinin B	IGHG1
Triptinin B	NCOA2
Triptinin B	NCOA1
Triptinin B	HSD17B1
Triptinin B	RCE1
Triptinin B	THRB THRA
Triptinin B	SRD5A2
Triptinin B	PTGDR
Triptinin B	AKR1C3
Triptinin B	ATP12A
Triptinin B	ACE
Triptinin B	ECE1
Triptinin B	GPBAR1
Triptinin B	ESR1
Triptinin B	ESR2
Triptinin B	RXRG
Triptinin B	RARG
Triptinin B	RARA
Triptinin B	BCL2L2
Triptinin B	BACE1
Triptinin B	AMPD1
Triptinin B	AMPD3
Triptinin B	MDM2
Triptinin B	AR
Triptinin B	AMPD2
Triptinin B	GSK3B
Triptinin B	GSK3A
Triptinin B	AGTR1
Triptinin B	SGK1
Triptinin B	RARB
Triptoditerpenic acid B	PTGS1
Triptoditerpenic acid B	CHRM3
Triptoditerpenic acid B	KCNH2
Triptoditerpenic acid B	CHRM1
Triptoditerpenic acid B	SCN5A
Triptoditerpenic acid B	F10
Triptoditerpenic acid B	CHRM5
Triptoditerpenic acid B	PTGS2
Triptoditerpenic acid B	CA2
Triptoditerpenic acid B	CHRM4
Triptoditerpenic acid B	RXRA
Triptoditerpenic acid B	OPRD1
Triptoditerpenic acid B	PDE3A
Triptoditerpenic acid B	ADRA1A
Triptoditerpenic acid B	PGR
Triptoditerpenic acid B	CHRM2
Triptoditerpenic acid B	ADRA1B
Triptoditerpenic acid B	ADRB2
Triptoditerpenic acid B	ADRA1D
Triptoditerpenic acid B	TOP2A
Triptoditerpenic acid B	OPRM1
Triptoditerpenic acid B	NR3C1
Triptoditerpenic acid B	HSP90AA1
Triptoditerpenic acid B	NCOA2
Triptoditerpenic acid B	NCOA1
Triptoditerpenic acid B	SRD5A2
Triptoditerpenic acid B	PTGIR
Triptoditerpenic acid B	PTGDR
Triptoditerpenic acid B	PSEN2 PSENEN NCSTN APH1A PSEN1 APH1B
Triptoditerpenic acid B	AGTR1
Triptoditerpenic acid B	SLC22A12
Triptoditerpenic acid B	SLC16A1
Triptoditerpenic acid B	CNR1
Triptoditerpenic acid B	CNR2
Triptoditerpenic acid B	MDM2
Triptoditerpenic acid B	TRPA1
Triptoditerpenic acid B	TBXAS1
Triptoditerpenic acid B	CDC25A
Triptoditerpenic acid B	CMA1
Triptoditerpenic acid B	SRD5A1
Triptoditerpenic acid B	FABP4
Triptoditerpenic acid B	CYP26B1
Triptoditerpenic acid B	CYP26A1
Triptoditerpenic acid B	RBP4
Triptoditerpenic acid B	TOP1
Triptoditerpenic acid B	SLC22A6
Triptoditerpenic acid B	RXRB
Triptoditerpenic acid B	RXRG
Triptoditerpenic acid B	TRPM8
Triptoditerpenic acid B	PRKAG1 PRKAB1 PRKAA2
Triptoditerpenic acid B	DAGLA
Triptoditerpenic acid B	ABAT
Triptoditerpenic acid B	ACE
Triptoditerpenic acid B	AKR1B10
Triptoditerpenic acid B	AKR1A1
Triptoditerpenic acid B	HSD17B1
Triptoditerpenic acid B	PIN1
Triptoditerpenic acid B	ADRA2B
Triptoditerpenic acid B	ADORA3
Triptoditerpenic acid B	MAPK14
Triptoditerpenic acid B	MME
Triptoditerpenic acid B	ACE2
Triptoditerpenic acid B	PTGES2
Triptoditerpenic acid B	OXER1
Triptoditerpenic acid B	ENPP2
Triptoditerpenic acid B	RARG
Triptoditerpenic acid B	RARB
Triptoditerpenic acid B	RARA
Triptoditerpenic acid B	CCKBR
Triptoditerpenic acid B	PTGER4
Triptoditerpenic acid B	PTGER2
Triptoditerpenic acid B	NR1H4
Triptoditerpenic acid B	ADAMTS5
Triptoditerpenic acid B	MAPK8
Triptoditerpenic acid B	MMP13
Triptoditerpenic acid B	MMP3
Triptoditerpenic acid B	MMP1
Triptoditerpenic acid B	CSNK2A1
Triptoditerpenic acid B	MMP8
Triptoditerpenic acid B	DAGLB
Triptoditerpenic acid B	CCR9
Triptolide	RELA
Triptolide	STAT3
Triptolide	BCL2
Triptolide	FOS
Triptolide	CDKN1A
Triptolide	PLAU
Triptolide	TNFSF15
Triptolide	JUN
Triptolide	CASP3
Triptolide	TP63
Triptolide	MAPK8
Triptolide	PTGS2
Triptolide	STAT1
Triptolide	IL8RA
Triptolide	MCL1
Triptolide	IL2
Triptolide	IFNGR1
Triptolide	IL4
Triptolide	XIAP
Triptolide	DEFB4A
Triptolide	CD80
Triptolide	CD86
Triptolide	CXCR4
Triptolide	BIRC3
Triptolide	CD274
Triptolide	IL23A
Triptolide	CCR7
Triptolide	CD1A
Triptolide	CD40
Triptolide	CD14
Triptolide	C3
Triptolide	VTCN1
Triptolide	S1PR3
Triptolide	JAK2
Triptolide	S1PR4
Triptolide	NOD1
Triptolide	KLF5
Triptolide	Hsf1
Triptolide	Chain A, BCL
Triptolide	STK33
Triptolide	Rorc
Triptolide	Ddit3
Triptolide	PTGS2
Triptolide	TDP1
Triptolide	F2RL1
Triptolide	IFNG
Triptolide	YAP1
Triptolide	DCTPP1
Triptolide	AR
Triptolide	IFNB1
Triptolide	HLA
Triptolide	ERCC3
Triptonide	PTGS2
Triptonide	F2RL1
Triptonide	KCNA3
Triptonide	NR3C1
Triptonide	AR
Triptonide	NR3C2
Triptonide	GSTM1
Triptonide	ATP2A1
Triptonide	OPRD1
Triptonide	PTPN1
Triptonide	PCSK7
Triptonide	P2RX3
Triptonide	MAOB
Triptonide	FDFT1
Triptonide	TERT
Triptonide	CASP8
Triptonide	CASP1
Triptonide	ADRA1D
Triptonide	PGR
Triptonide	ERBB2
Triptonide	MAPK10
Triptonide	VAV1
Triptonide	CAPN1
Triptonide	SCN9A
Triptonide	PPP2CA
Triptonide	ABCC9
Triptonide	TOP2A
Triptonide	NFKBIA
Triptonide	RELA
Triptonide	IARS
Triptonide	ALOX12
Triptonide	OPRK1
Triptonide	MAPK14
Triptonide	PTGS1
Triptonide	CDK5R1 CDK5
Triptonide	AURKA
Triptonide	ADORA2A
Triptonide	ADORA2B
Triptonide	ADORA3
Triptonide	SLC5A1
Triptonide	CYP19A1
Triptonide	EWS-Fli1
Triptonide	BDKRB1
Triptonide	IDO1
Triptonide	HSD11B2
Triptonide	MPO
Triptonide	CSF1R
Triptonide	KDM5C
Triptonide	KDM4B
Triptonide	KDM5B
Triptonide	KDM4A
Triptonide	HDAC6
Triptonide	CCNB3 CDK1 CCNB1 CCNB2
Triptonide	HDAC1
Triptonide	ADORA1
Triptonide	KIF11
Triptonide	EDNRB
Triptonide	PDE10A
Triptonoditerpenic acid	CHRM3
Triptonoditerpenic acid	KCNH2
Triptonoditerpenic acid	CHRM1
Triptonoditerpenic acid	SCN5A
Triptonoditerpenic acid	PTGS2
Triptonoditerpenic acid	CA2
Triptonoditerpenic acid	OPRD1
Triptonoditerpenic acid	ADRA1B
Triptonoditerpenic acid	ADRB2
Triptonoditerpenic acid	TOP2A
Triptonoditerpenic acid	NCOA2
Triptonoditerpenic acid	NCOA1
Triptonoditerpenic acid	CNR1
Triptonoditerpenic acid	SRD5A2
Triptonoditerpenic acid	CNR2
Triptonoditerpenic acid	RCE1
Triptonoditerpenic acid	CYP26A1
Triptonoditerpenic acid	PTGDR
Triptonoditerpenic acid	GPBAR1
Triptonoditerpenic acid	THRB THRA
Triptonoditerpenic acid	ACE
Triptonoditerpenic acid	AGTR1
Triptonoditerpenic acid	HSD17B1
Triptonoditerpenic acid	GSK3B
Triptonoditerpenic acid	GSK3A
Triptonoditerpenic acid	CCR1
Triptonoditerpenic acid	BCL2L2
Triptonoditerpenic acid	SLC6A1
Triptonoditerpenic acid	AMPD2
Triptonoditerpenic acid	PIN1
Triptonoditerpenic acid	ATP12A
Triptonoditerpenic acid	ITGB1 ITGA4
Triptonoditerpenic acid	ITGB7 ITGA4
Triptonoditerpenic acid	MMP13
Triptonoditerpenic acid	MMP3
Triptonoditerpenic acid	IMPDH2
Triptonoditerpenic acid	MDM2
Triptonoditerpenic acid	SRD5A1
Triptonoditerpenic acid	CSF1R
Triptonoditerpenic acid	TRPM8
Tripdiotolnide	NR3C2
Triptonolide	CHRM3
Triptonolide	CHRM1
Triptonolide	SCN5A
Triptonolide	F10
Triptonolide	CHRM5
Triptonolide	PTGS2
Triptonolide	CA2
Triptonolide	OPRD1
Triptonolide	ADRA1A
Triptonolide	PGR
Triptonolide	CHRM2
Triptonolide	ADRB2
Triptonolide	TOP2A
Triptonolide	OPRM1
Triptonolide	CHRNA7
Triptonolide	NCOA2
Triptonolide	NCOA1
Triptonolide	CALM1
Triptonolide	ADORA2A
Triptonolide	HTR1A
Triptonolide	DRD2
Triptonolide	BACE2
Triptonolide	BACE1
Triptonolide	P2RX7
Triptonolide	MTNR1A
Triptonolide	MTNR1B
Triptonolide	GSK3B
Triptonolide	ADAM17
Triptonolide	PSEN2 PSENEN NCSTN APH1A PSEN1 APH1B
Triptonolide	PDF
Triptonolide	RORC
Triptonolide	DRD4
Triptonolide	HTR2A
Triptonolide	HRH4
Triptonolide	MMP1
Triptonolide	MMP14
Triptonolide	ADRA2A
Triptonolide	ADRA2C
Triptonolide	ADRA2B
Triptonolide	MMP3
Triptonolide	CDK4
Triptonolide	MMP8
Triptonolide	DRD1
Triptonolide	CAPN1 CAPNS1
Triptonolide	PIM2
Triptonolide	MMP7
Triptonolide	NAAA
Triptonolide	PDGFRB
Triptonolide	PIK3CA PIK3R1
Triptonolide	ELANE
Triptonolide	CALCRL
Triptonolide	EEF2K
Triptonolide	NEK1
Triptonolide	HDAC3
Triptonolide	HDAC6
Triptonolide	HDAC2
Triptonolide	HDAC8
Triptonolide	HDAC1
Triptonolide	HDAC11
Triptonolide	HDAC10
Triptonolide	TLR9
Triptonolide	FKBP1A
Triptonolide	TYMS
Triptonolide	PITRM1
Triptonolide	AURKA
Triptonolide	CHRNA7
Triptonolide	PLA2G7
Triptonolide	ADRA1D
Triptonolide	ADRA1A
Triptonolide	ADRA1B
Triptonolide	EGFR
Triptonolide	MYC
Triptonolide	CTSV
Triptonoterpene	PTGS1
Triptonoterpene	CHRM3
Triptonoterpene	CHRM1
Triptonoterpene	SCN5A
Triptonoterpene	PTGS2
Triptonoterpene	CA2
Triptonoterpene	RXRA
Triptonoterpene	ACHE
Triptonoterpene	ADRA1A
Triptonoterpene	PGR
Triptonoterpene	CHRM2
Triptonoterpene	ADRA1B
Triptonoterpene	ADRB2
Triptonoterpene	ADRA1D
Triptonoterpene	OPRM1
Triptonoterpene	NR3C1
Triptonoterpene	NCOA2
Triptonoterpene	NCOA1
Triptonoterpene	HSD17B1
Triptonoterpene	CYP19A1
Triptonoterpene	ESR1
Triptonoterpene	KDR
Triptonoterpene	AR
Triptonoterpene	POLA1
Triptonoterpene	ESR2
Triptonoterpene	NR1H3
Triptonoterpene	NR1H2
Triptonoterpene	HTR2B
Triptonoterpene	SRC
Triptonoterpene	PTK2
Triptonoterpene	ALK
Triptonoterpene	PTGES
Triptonoterpene	HSD17B2
Triptonoterpene	STS
Triptonoterpene	SHBG
Triptonoterpene	ALOX5
Triptonoterpene	HSD11B1
Triptonoterpene	TSPO
Triptonoterpene	GPR18
Triptonoterpene	CNR1
Triptonoterpene	CNR2
Triptonoterpene	ESRRA
Triptonoterpene	ESRRB
Triptonoterpene	GPER1
Triptonoterpene	SLC6A4
Triptonoterpene	HTR1B
Triptonoterpene	HTR1A
Triptonoterpene	HTR6
Triptonoterpene	PARP1
Triptonoterpene	GPBAR1
Triptonoterpene	ADCY10
Triptonoterpene	IGF1R
Triptonoterpene	ELAVL1
Triptonoterpene	ERBB2
Triptonoterpene	BACE1
Triptonoterpene	SRD5A1
Triptonoterpene	SRD5A2
Triptophenolide	CHRM3
Triptophenolide	KCNH2
Triptophenolide	CHRM1
Triptophenolide	SCN5A
Triptophenolide	CHRM5
Triptophenolide	PTGS2
Triptophenolide	CA2
Triptophenolide	RXRA
Triptophenolide	OPRD1
Triptophenolide	PDE3A
Triptophenolide	PGR
Triptophenolide	CHRM2
Triptophenolide	ADRB2
Triptophenolide	TOP2A
Triptophenolide	OPRM1
Triptophenolide	HSP90AA1
Triptophenolide	CHRNA7
Triptophenolide	NCOA2
Triptophenolide	NCOA1
Triptophenolide	AR
Triptophenolide	PARP1
Triptophenolide	NEK1
Triptophenolide	DRD2
Triptophenolide	PLA2G7
Triptophenolide	DRD4
Triptophenolide	HTR2A
Triptophenolide	PRKCZ
Triptophenolide	SRD5A2

## Sheet: Table S3
A list of 1516 Targets linked to IgAN excavated from OMIM and GeneCards
PLEKHG5
DJ1
KIF1B
MTHFR
MFN2
GBD2
PINK1
ECE1
AD7CNTP
IBD7
RHD
RHCE
YARS1
GBD3
PARK10
FOXD3
DNAJC6
IL23R
PAOD1
TNNI3K
ABCA4
AGL
DBT
ATP1A1
NBLST6
NOTCH2NLC
ECM1
AD13
RFH1
ZNF687
MUC1
GBA
LMNA
CADM3
COPA
MPZ
AD14
NCF2
CELIAC7
CFHR5
IBD23
INAVA
REN
SLC41A1
IL10
FCAMR
PARK16
RMD1
TLR5
PSEN2
ADAM17
MPV17
HNFJ3
ABCG8
PARK3
HTRA2
COPD
CELIAC8
ZAP70
IL37
CHDS2
HOXD10
PDE11A
BMPR2
CTLA4
FARSB
IGAN2
IRS1
SP110
GIGYF2
ATG16L1
SAG
PDCD1
IBD9
MYMY1
CAV3
CX3CR1
IBD12
CELIAC9
HSCR6
GBE1
CHDS5
POGLUT1
SEC61A1
RAB7
ATP2C1
AD15
PARK21
DZIP1L
GYG1
MME
CELIAC10
GNB4
EIF4G1
DNAJB11
CELIAC11
HTT
PROM1
HDL3
UCHL1
PHOX2B
AIS4
JCHAIN
PKD2
PPM1K
SNCA
ADH1C
CELIAC6
HSCR9
TRIM2
GDNF
IBD18
HEXB
PDE8B
APC
SAR1B
AITD2
CELIAC2
IBD5
PDB4
HARS1
SH3TC2
IRGM
SQSTM1
HFE
DHX16
HLA-DQA1
HLA-DQB1
HLA-DPB1
IBD3
MBNP
VAMAS6
AD17
FCYT
AITD1
SLC17A5
ELOVL4
BCKDHB
SEC63
FIG4
IGAN1
ENPP1
CELIAC12
LPA
PRKN
TBP
IL6
HNRPA2B1
GARS1
SFRP4
PGAM2
EGFR
CHCHD2
NCF1
HSPB1
CD36
ABCB4
ABCB1
PON1
PON2
ARPC1B
IBD11
IRF5
NOS3
PRKAG2
AD10
AIS2
GATA4
CHDS9
NEFL
AD12
CMT2H
JPH1
GDAP1
PMP2
MYMY3
TNFRSF11B
TG
NDRG1
ZFAT1
SLURP1
AIS3
AD11
CHDS8
VCP
ABCA1
HNP1
HSCR5
IBD16
CRB2
LRSAM1
GLE1
SURF1
NOTCH1
DHTKD1
AD7
PHYH
AITD4
RET
IBD15
CD79A
TGFB1
CD40LG
ACE
ALB
CCL2
AGTR1
TP53
VWF
CFH
NAGLU
AGT
SMPD1
ICAM1
NPHS1
COL4A1
SERPINA1
SELE
MEFV
SPRY2
MIF
UMOD
IL1RN
NPHS2
CCR6
FCAR
CFTR
FAS
MBL2
FN1
C3
PRTN3
PDGFB
C4A
TFRC
SPP1
NDP
CD2AP
CTNNB1
PIGR
LRP5
CD40
SELL
SCGB1A1
SERPINB7
CFHR2
ADD1
TNFRSF13B
LDLR
CASP8
NLRP3
MAFB
VEGFA
AIFM1
VCAM1
CFP
C1GALT1
CASP3
B2M
WT1
PTX3
PF4
TNF
IL1R1
MECP2
COL4A5
CHAT
TH
ARSA
NRAS
C1GALT1C1
COL4A3
FZD4
SYK
AICDA
RAB33A
COL4A4
MPO
MASP1
SOD2
AQP2
THPO
INS
SERPINE1
AMBP
PNPLA2
APOA1
AKR1B1
PRSS23
TSPAN12
ZFYVE9
PRODH
HLA-DRB1
THBS1
LMX1B
MAOB
MEST
IL3
CD19
EDN1
MAOA
IL2RA
MYH9
MVK
CRP
IL4
FGA
IL1B
COL4A2
LCN2
ADA
HP
ADIPOQ
RAG2
NUP107
HPRT1
IGHA1
RAG1
DBH
B3GALNT2
APOE
HAVCR1
IFNG
WAS
PGM3
TTR
AQP4
PPARG
AGTR2
CCN2
NPPA
IL18
ICOS
ATM
HNF1A
DNMT3B
PLA2R1
TGM2
VLDLR
PSMB8
JAK3
VTN
CCND1
EPO
IL7R
APOL1
FASLG
CDKN3
BMP6
APEX1
LIG4
TREX1
CCR5
MTOR
IGHE
ALPP
LYZ
CXCL8
GREM1
CST3
EGF
INF2
KIF11
HLA-A
LTA
AQP1
HNF4A
MMP9
TNFSF13B
LONP1
IL2
TF
CCL5
LRP2
HMOX1
ACTN4
PRKCD
CD4
BTK
CUX1
CFHR1
CR2
MGMT
SLC2A1
WNT4
TLR4
ZNF408
PODXL
SLC12A3
SLC11A2
SYNPO
TNFSF13
IGHG1
PDGFD
AGER
WNT10A
SMAD3
UBD
RASGRP1
LRBA
CFHR3
HLA-B
CASP10
NOS2
AHI1
WNT5A
ADAMTSL1
NOD2
COL4A6
TNFRSF1A
OAT
WNT3
TRPC6
HSPA9
FADD
THBD
SGK1
IGKC
NEU1
RXYLT1
F3
BLK
FOXP3
IGF1
TNFRSF11A
TTC7A
FABP1
MIP
SAA1
WNT3A
SMAD2
CLU
NFKB2
CHRND
ST6GALNAC2
AQP5
GLA
PNMT
BCL2
TLR3
ACE2
LPL
POU3F4
WNT7A
PLVAP
WIPF1
SCARB2
CYP11B2
FGF2
WNT2B
STING1
JAK1
NLRP1
IL5
ERVW-1
SELP
RSPO1
ADM
CGA
GAPDH
IL12A
IGHA2
NAGA
TLR2
BDKRB1
TGIF1
COL7A1
CCL3
CYBA
TNFRSF25
TYMS
B3GLCT
NFKB1
CYP3A4
HGF
CHRNB1
SH2D1A
SOD1
IL15
PAX2
BMP7
RNASE3
HIF1A
VDR
IL13
BAX
WNT10B
WNT2
RBP4
RETN
IL1A
CSF1
GGT1
ITGB4
LMO2
TMEM126A
CD27
F2
PTPN22
STAT1
IL21
MRE11
CHD7
TRAC
KRAS
HSPG2
APOH
PRKCB
CHRNA2
AQP3
APOB
WNT7B
ALDH1A1
APOC3
PLA2G1B
LTF
ICOSLG
CETP
PIK3R1
TPO
PJVK
ESR1
PTPRC
MMP1
TRA
HMGCR
PLAT
PPARA
FLT1
CD8A
MLKL
TP53BP1
KL
STAT3
CEL
ALPI
CAT
TAP2
INVS
KITLG
IL17A
IL6R
POSTN
STAT4
CD86
RPL36A-HNRNPH2
CCR1
MAPK1
CYP1A1
DPP4
MTMR3
GSN
DDR1
SIRT1
TGFB2
ITGAM
MT-ATP6
CXCL10
INPP5E
IQCB1
GAS6
BDKRB2
LBR
MBP
CCR2
TLR9
PDGFA
CP
RAC1
CD14
TIMP1
TNFRSF1B
UCP2
CHRNA5
GPHA2
PTH
AKT1
OSM
TRDN
H2AC18
ITGA2
MT-CO1
LAMA5
PTEN
WNT9B
MTR
IGHMBP2
CD80
BRWD3
PPARGC1A
ITGA4
IL1RAPL2
IAPP
FGFR3
MMP7
XDH
MYD88
MAPK14
WNT11
XIAP
IFNA1
USP2
CD28
IL2RB
ITGB2
AGRN
POLB
UCP1
SUV39H1
DMD
IPO8
HLA-DPA1
MMP12
EPHX2
C1QA
CYLD
GSTM1
GP1BA
EDNRA
NOTCH3
IGKV3-20
PLG
JUN
PKD1
CXCL12
ACKR2
ADD2
TNFSF12-TNFSF13
CASP1
ITGB1
SLC5A2
LIPC
IFIH1
MMP3
PCNA
HLA-E
FCGR3A
GSTT1
PAFAH1B1
FCRL3
GNB3
SERPINA3
CDCA7
PTGS2
HORMAD2
DNMT1
IL1R2
NQO1
SMAD7
NID1
CSF2
TAP1
GABBR1
FABP2
IGHV4-38-2
LGR4
C5
IGFBP1
KNG1
GREM2
FHL2
NUP133
FZD8
MMP2
NSD2
PLAUR
CFB
FCGR2A
IL4R
FGB
PARP1
MYOM2
CUBN
WNT8B
RHOA
WNT16
DRD2
MYC
ST6GAL1
SST
EFHC2
TFR2
ADRB3
LAMB1
SPTAN1
LEP
TPSAB1
SMAD1
TRAF1
BGLAP
KLK11
MUC20
FCGR3B
HTR2A
IL7
CASR
ADRB2
SLC3A1
CD44
CYP2C9
MPDU1
PLAU
GYS1
SLC22A6
HS6ST2
BCAT2
RYK
AHSG
TNFSF11
SOCS1
CXCR3
DAND5
TGFBR2
FZD1
MCAM
WNT9A
ZFPM1
GATA3
CCL25
IL9
HLA-DMA
GCG
IGF1R
BCL6
CCL28
CER1
FCN3
SRC
SERPINC1
ELANE
XBP1
HSPD1
FCER2
IGHM
ACTA2
TLR1
ITGAX
SLC30A8
BLZF1
HPSE
F5
AXL
PRL
LRP1
CBX5
SOX15
ACOXL
F2RL1
GHRL
GALNT2
WNT5B
BDNF
ADH1B
S100A8
ATP6V1B1
LALBA
AQP10
CARD9
CMA1
CX3CL1
IL5RA
UNC119
ERCC6
HDAC6
TGFBR1
LAMB2
ENG
DOCK8
UTS2
F12
CYP2J2
GJA4
GP6
MTTP
THBS4
GCLM
FUT4
SAMHD1
KDR
NFE2L2
PTPRO
SMAD4
CDK2
MS4A1
APOM
CD38
SHC1
TBXAS1
DCN
TJP1
WNT8A
APOC2
GZMB
NOTCH4
CXCL1
CLCN5
WNT6
CDKN2A
CCL11
PRSS1
GPX3
DEFA3
MAPK3
CDH1
TNR
GCM1
EP300
LTBP1
C4B
FLT3LG
CCL20
NRP1
GAD2
MDK
CAMP
CRYAA
TNFSF12
BACH1
CYP21A2
PSMB9
AQP9
ACSL4
DEFA1
F10
AIRE
CELA3B
IFNGR1
DDX58
CXCL9
CHGA
CERT1
S100A9
CALR
AVP
SDC1
NPY1R
ATL1
ITIH4
ATP6AP2
CLEC12A
PRKCA
ZNF236
TMEM11
APOBEC2
KMT2C
SMAD5
TET2
HMGB1
FCER1A
PTGDS
HIPK2
IRF3
LTBR
VIM
COL1A2
CD84
VCX3A
GSTP1
ASGR2
GDF15
MDM2
STAT6
MX1
HAVCR2
ITGB3
FOXP1
CAV1
RGS1
TNFSF10
WRN
ADAMTS13
CARD8
PML
HRAS
LAP3
LGALS3BP
ENAH
JAK2
CLDN14
MYO15A
CD81
VAV3
DEFA5
HSPA1A
PRDM1
CDC42
CASP9
LTC4S
PDE5A
TNFRSF6B
TNFAIP1
FDX1
CXCR4
NR3C1
C5AR1
APOA4
IL18BP
NES
LAMA1
HLA-C
SDC2
NLRC4
E2F1
SMARCA4
COL1A1
MSR1
PIK3CA
GPX1
H1-5
H3C14
ANKRD55
TUG1
TXN
H2BC12L
SOX2
ANGPT1
PTPN3
RB1
TRAF6
ALOX5
B4GALT1
PTMA
REG1A
ENO1
CYP3A5
TSBP1
C1QTNF3
C3AR1
HDAC9
GALNS
ITGA1
LRG1
NPY
NOS1
CDK5
ITGAL
TMEM147
PSTPIP1
ANPEP
IL10RA
C4BPA
H2AX
AMMECR1
ZC3H12C
TMEM164
POMGNT2
KLRK1
SIRPA
IL11
AQP7
ALG9
ERBB2
PEBP4
LGALS3
CYP19A1
GALNT12
ITGA5
MAGT1
PLCG1
YAP1
EEF1A1
FCN2
AQP8
NPPC
CD5L
CD55
XCL1
CMIP
PTPRN
IL33
STAT5B
SH2B3
FCRL6
G6PD
LCP2
MASP2
HDAC4
LAMA2
IGBP1
KCNE5
TNFSF14
DDN
GC
PLA2G7
CCR3
DDOST
MET
MICA
SAFB
FCGR2B
TNFRSF12A
PTGS1
ITGA3
PREP
HLA-DMB
FBN1
FAT1
BATF
TLR10
SERPINH1
FOS
PROC
TGM1
TRAF5
PTPN2
SORD
CXCL16
SLC30A10
LIF
CFHR4
CD226
CDKN1A
CSNK2B
POU5F1
TCF19
PSORS1C1
GHR
CD5
GAST
TSLP
CYP2D6
ACVR1
SIGLEC1
MAF
XRCC1
ADAMTS5
GH1
PSAP
XK
SDCBP
CD59
CDH5
MR1
DGKE
GOLGA2
MYCT1
ZNF543
UBE2W
FCRLB
DNMT3A
TCF3
CHIA
STMN1
KPNA4
IRF4
TGFBI
PDGFRB
PROCR
SPINK1
SOCS3
TLR7
COL18A1
TWIST1
HSP90AA1
ADAM10
IFNB1
CYCS
LCN1
NCAM1
LPP
ACTN1
IL12B
HAX1
SERPINA7
IL1RL1
CELA1
CXCR2
SETD2
PRCP
SPINT2
CAP1
KPNA1
HMGB2
TFF3
IL22RA1
FCRL2
DEFA6
FCRL1
HECW1
VWCE
SMARCA2
SNX9
ABCG1
UNC13D
EXOC7
PROS1
PTPN11
TKT
DYSF
BSG
DACH1
CADM1
SEMA3A
SPN
HSPA4
TNFRSF17
TBX21
IKZF3
H1-4
H3C1
CREB1
ELN
EDNRB
FMOD
BCL2L11
NDUFS3
GNG2
NTN4
PHLDB1
THY1
AGPAT1
EGFL8
GPANK1
C6orf15
FCGR1A
HPX
RPGR
ALOX5AP
RECQL5
VCL
ACTB
PIK3CG
ITGA6
COL5A1
GSTA1
MMP14
TREM1
SLC4A4
MB
PTPN6
KIRREL2
UHRF1
SMURF1
SLC5A1
CHI3L1
PDPN
RNASEH1
CSN2
BRD4
CD209
CXCL5
BID
OPTN
CEBPA
PXN
LGALS1
CD69
GCH1
CABIN1
ABCF1
LSM2
CDH11
H3-7
CR1
TGFB1I1
PTPRQ
RHOD
CDK1
INCENP
FCGRT
GCKR
ACSM3
NPNT
MMAB
MST1R
KMT2D
MRC2
ZMPSTE24
SLC4A1
AQP11
ITGAE
CSF3
GHSR
COMT
CLEC4A
PDGFC
GPT
SLAMF7
SPARC
ICAM3
CLTRN
IL22
GRB2
NOTCH2
SHBG
CKAP5
ILK
ALDH2
DES
FDCSP
GP2
ITK
RECQL4
MT-CYB
ACKR1
F9
PKM
LYN
COL5A2
DMRT1
AREG
TNC
HNRNPA2B1
VDAC1
STAT5A
ACTR2
CCL26
USF1
USP14
NLRP12
ROCK1
NR1I2
LCP1
SH2D4B
CBL
IFI27
TAC1
CALCA
MMAA
PLEK
WHAMM
KLF10
ETS1
RPS27A
TNFSF4
EIF4H
NUP85
NUP160
BUD23
PRKAA2
CD63
ANXA5
TNFAIP8
SMURF2
ABL1
U2AF1
SERPINF2
DKK3
CA2
TNFRSF8
PLSCR3
MSN
ABCB7
TUBG1
RIPK1
RAB27A
NCKIPSD
NLRC5
CXCL13
GFAP
GRN
KDM4C
CD34
XRCC3
CDH23
PADI6
TMEM107
APP
TIA1
ALK
SLPI
HSPA8
LUM
PTK2
TERT
PPIA
ATP6V0A4
SCT
PREX2
NAT2
GADD45G
IKZF1
CCK
HBB
IRAK1
IRAK4
PTAFR
UBE4A
RIPK3
HLA-G
FYN
VAV1
WASF1
NCK1
CTTN
WASF2
BAIAP2
ACTR3
WASL
WASF3
MCPH1
TRIP10
FMN1
LYST
ARFRP1
WASHC1
NFKBIA
TRAF3
SUCNR1
CREBBP
ABCB11
SUOX
BRAF
NR1H2
FOXM1
SNTA1
CCL24
LAMP2
TNFRSF10A
MUC16
ACP1
FCN1
CTCF
PI4KA
DNMT3L
CCN1
IDH2
CCND2
BLNK
CD79B
IGLL1
LRRC8A
MCL1
CD274
SH3KBP1
NGF
GPRC5B
CD46
FOSL1
FOSB
CALB2
LAMP3
COG2
SERPINB4
AZGP1
NTRK2
CDKN1B
EXT2
TRB
MUC7
DRD1
TNS1
AXDND1
EZR
RAB11A
EZH2
CDK4
KIT
FLT3
IDH1
AURKA
IMPDH1
RXRA
NF1
PIK3R2
CCND3
RAB7A
BARD1
ABCB6
BAP1
BCL2L1
NKX2-1
BIRC2
ATP6V1A
DKK1
CD33
CDKN2C
LATS1
TUBB4A
NCOR2
CRBN
KDM5C
PSMB5
TNFRSF9
ERF
SPTBN2
UCHL5
TNFRSF18
TRNT1
CKS1B
DIS3
EIF1AX
TET3
WDR45
CTRL
PMAIP1
DAZAP2
ARID4A
MGA
P2RY8
BCORL1
LRRC56
FAM135A
RAB7B
TENT5C
H2AC16
H2AC17
DDAH2
CD68
MTRR
PEPD
PPOX
POLI
NTRK1
AFP
JUP
AP2B1
RCAN1
CXCR5
LAMP1
PDP1
DAG1
PDLIM5
CD74
SELENBP1
FABP3
GUSB
OTC
SFTPD
KLF6
CHEK1
SMN1
MAGI2
ANXA3
KEAP1
NR1H3
ASIC1
ASIC2
KPNA2
PYCARD
NDE1
EPAS1
STOM
NOD1
C1QC
C1QB
TMPO
RECK
TRIM40
ICA1
CYP2B6
LILRB3
PCNT
SFN
CYP2C19
PGR
DPEP1
FMR1
FSHB
ROM1
FAM20B
ABCC2
NLN
ARF6
USF2
PGC
FAR2
SMPDL3B
PDLIM1
EFEMP1
PRSS8
IBTK
SNRNP70
DISC1
CTNND1
CRHR1
DEFB1
KAT5
EEF1D
UBA52
TP63
CTSC
A2M
BCHE
ADCYAP1
S100A6
ACYP2
CCL4
BTD
INPP5D
APOD
CXCL6
AZIN2
PLA2G2A
PTH1R
ANXA2
ATF2
TAGLN
CCL8
HDAC5
PTK2B
ATP7B
PTGER2
RARB
MKI67
CRKL
SI
ASGR1
CTSG
C4BPB
UBC
CCL23
TBXT
ENO2
LTA4H
CASQ1
HRG
S100B
CD2
GZMA
SPTB
C1D
B3GNT2
CD248
LGALS9
CCL13

## Sheet: Table S4
A list of the interactions between 17 compounds from THH and IgAN-related 165 target genes
Compound	Gene
(+)-Epicatechin	PTGS1
(+)-Epicatechin	ESR1
(+)-Epicatechin	PTGS2
(+)-Epicatechin	HSP90AA1
(+)-Catechin	PTGS1
(+)-Catechin	ESR1
(+)-Catechin	PTGS2
(+)-Catechin	HSP90AA1
(+)-Catechin	RXRA
Triptolide	STAT3
Triptolide	BCL2
Triptolide	FOS
Triptolide	CDKN1A
Triptolide	IFNB1
Triptolide	PLAU
Triptolide	YAP1
Triptolide	NOD1
Triptolide	JUN
Triptolide	CASP3
Triptolide	TP63
Triptolide	PTGS2
Triptolide	STAT1
Triptolide	MCL1
Triptolide	IL2
Triptolide	IFNG
Triptolide	IFNGR1
Triptolide	IL4
Triptolide	XIAP
Triptolide	CD80
Triptolide	CD86
Triptolide	CXCR4
Triptolide	CD274
Triptolide	CD40
Triptolide	CD14
Triptolide	C3
Triptophenolide	PTGS2
Triptophenolide	CA2
Triptophenolide	RXRA
Triptophenolide	PGR
Triptophenolide	HSP90AA1
Triptophenolide	PARP1
Triptophenolide	DRD2
Triptophenolide	PLA2G7
Triptophenolide	HTR2A
Celafurine	F2
Celafurine	ADAM17
Celafurine	AGTR2
Celafurine	AURKA
Celafurine	BDKRB2
Celafurine	BRD4
Celafurine	CA2
Celafurine	CASP3
Celafurine	CCR5
Celafurine	CDK1
Celafurine	CDK2
Celafurine	CDK4
Celafurine	CREBBP
Celafurine	CRHR1
Celafurine	JAK1
Celafurine	JAK2
Celafurine	JAK3
Celafurine	KDR
Celafurine	KIF11
Celafurine	MDM2
Celafurine	MET
Celafurine	MTOR
Celafurine	PDE8B
Celafurine	PDGFRB
Celafurine	PIK3CA
Celafurine	PIK3CG
Celafurine	PLA2G7
Celafurine	PRKCD
Celafurine	RHOA
Hypodiolide A	NR3C1
Hypodiolide A	HMGCR
Hypodiolide A	CYP19A1
Hypodiolide A	VDR
Hypodiolide A	CCR1
Hypodiolide A	C5AR1
Hypodiolide A	PRKCA
Hypodiolide A	PRSS1
Hypodiolide A	EPHX2
Hypodiolide A	SHBG
Hypodiolide A	APP
Hypodiolide A	HIF1A
Triptinin B	PTGS2
Triptinin B	CA2
Triptinin B	RXRA
Triptinin B	PGR
Triptinin B	NR3C1
Triptinin B	ACE
Triptinin B	ECE1
Triptinin B	ESR1
Triptinin B	MDM2
Triptinin B	AGTR1
Triptinin B	SGK1
Triptinin B	RARB
Triptoditerpenic acid B	PTGS1
Triptoditerpenic acid B	F10
Triptoditerpenic acid B	PTGS2
Triptoditerpenic acid B	CA2
Triptoditerpenic acid B	RXRA
Triptoditerpenic acid B	PGR
Triptoditerpenic acid B	NR3C1
Triptoditerpenic acid B	HSP90AA1
Triptoditerpenic acid B	AGTR1
Triptoditerpenic acid B	MDM2
Triptoditerpenic acid B	TBXAS1
Triptoditerpenic acid B	CMA1
Triptoditerpenic acid B	RBP4
Triptoditerpenic acid B	SLC22A6
Triptoditerpenic acid B	ACE
Triptoditerpenic acid B	MAPK14
Triptoditerpenic acid B	MME
Triptoditerpenic acid B	ACE2
Triptoditerpenic acid B	RARB
Triptoditerpenic acid B	PTGER2
Triptoditerpenic acid B	ADAMTS5
Triptoditerpenic acid B	MMP3
Triptoditerpenic acid B	MMP1
Triptonoditerpenic acid	PTGS2
Triptonoditerpenic acid	CA2
Triptonoditerpenic acid	ACE
Triptonoditerpenic acid	AGTR1
Triptonoditerpenic acid	CCR1
Triptonoditerpenic acid	MMP3
Triptonoditerpenic acid	MDM2
Triptonoterpene	PTGS1
Triptonoterpene	PTGS2
Triptonoterpene	CA2
Triptonoterpene	RXRA
Triptonoterpene	PGR
Triptonoterpene	NR3C1
Triptonoterpene	CYP19A1
Triptonoterpene	ESR1
Triptonoterpene	KDR
Triptonoterpene	NR1H3
Triptonoterpene	NR1H2
Triptonoterpene	SRC
Triptonoterpene	PTK2
Triptonoterpene	ALK
Triptonoterpene	SHBG
Triptonoterpene	ALOX5
Triptonoterpene	PARP1
Triptonoterpene	IGF1R
Triptonoterpene	ERBB2
Triptonolide	F10
Triptonolide	PTGS2
Triptonolide	CA2
Triptonolide	PGR
Triptonolide	DRD2
Triptonolide	ADAM17
Triptonolide	HTR2A
Triptonolide	MMP1
Triptonolide	MMP14
Triptonolide	MMP3
Triptonolide	CDK4
Triptonolide	DRD1
Triptonolide	MMP7
Triptonolide	PDGFRB
Triptonolide	ELANE
Triptonolide	HDAC6
Triptonolide	TLR9
Triptonolide	TYMS
Triptonolide	AURKA
Triptonolide	PLA2G7
Triptonolide	EGFR
Triptonolide	MYC
Epigallocatechin	PTGS1
Epigallocatechin	ALB
Epigallocatechin	ESR1
Epigallocatechin	PTGS2
Epigallocatechin	HSP90AA1
Celastrol	TP53
Celastrol	NR3C1
Celastrol	CCND1
Celastrol	BCL2
Celastrol	STAT3
Celastrol	BCL2L1
Celastrol	BAX
Celastrol	FLT1
Celastrol	YAP1
Celastrol	KDR
Celastrol	MMP9
Celastrol	JUN
Celastrol	PTGS2
Celastrol	BIRC2
Celastrol	AKR1B1
Celastrol	MMP2
Celastrol	TIMP1
Celastrol	MMP1
Celastrol	MYC
Celastrol	COL7A1
Celastrol	COL4A4
Celastrol	TERT
Celastrol	PTPN11
Celastrol	TLR9
Celastrol	IFNB1
Celastrol	CYP19A1
Celastrol	PTEN
Celastrol	SHBG
Celastrol	XIAP
Celastrol	ACE
Oleanolic acid	CASP3
Oleanolic acid	POLB
Oleanolic acid	PTPN2
Oleanolic acid	PLA2G1B
Oleanolic acid	ACP1
Oleanolic acid	CD81
Oleanolic acid	PTPN6
Oleanolic acid	NOS2
Oleanolic acid	FABP1
Oleanolic acid	PPARG
Oleanolic acid	PREP
Oleanolic acid	PTPN11
Oleanolic acid	TERT
Oleanolic acid	PTGS2
Oleanolic acid	CYP19A1
Oleanolic acid	PPARA
Oleanolic acid	SHBG
Oleanolic acid	G6PD
Oleanolic acid	PTGS1
Oleanolic acid	FABP3
Oleanolic acid	PTGER2
Oleanolic acid	MAPK3
Oleanolic acid	NR1H3
Oleanolic acid	NR3C1
Oleanolic acid	CYP2C19
Oleanolic acid	HMGCR
Oleanolic acid	TLR9
Oleanolic acid	ALOX5
Oleanolic acid	PGR
Oleanolic acid	ALOX5AP
Oleanolic acid	ESR1
Oleanolic acid	BCHE
Oleanolic acid	MDM2
Triptonide	PTGS2
Triptonide	F2RL1
Triptonide	NR3C1
Triptonide	GSTM1
Triptonide	MAOB
Triptonide	TERT
Triptonide	CASP8
Triptonide	CASP1
Triptonide	PGR
Triptonide	ERBB2
Triptonide	VAV1
Triptonide	NFKBIA
Triptonide	MAPK14
Triptonide	PTGS1
Triptonide	AURKA
Triptonide	SLC5A1
Triptonide	CYP19A1
Triptonide	BDKRB1
Triptonide	MPO
Triptonide	KDM5C
Triptonide	HDAC6
Triptonide	KIF11
Triptonide	EDNRB
Celabenzine	HTR2A
Celabenzine	CCR5
Celabenzine	EPHX2
Celabenzine	EGFR
Celabenzine	PRCP
Celabenzine	DPP4
Celabenzine	EP300
Celabenzine	DRD2
Celabenzine	CCR3
Celabenzine	F2
Celabenzine	F10
Celabenzine	MTOR
Celabenzine	PIK3CA
Celabenzine	CYP11B2
Celabenzine	CCR1
Celabenzine	CREBBP
Celabenzine	PPIA
Celabenzine	PLA2G2A
Celabenzine	SYK
Celabenzine	PDE5A
Celabenzine	APP
Celabenzine	MET
Celabenzine	TGFBR1
Celabenzine	AURKA
Celabenzine	PSMB5
Celabenzine	MAPK14
Celabenzine	CRHR1
Celabenzine	NTRK1
Salaspermic acid	CYP19A1
Salaspermic acid	TERT
Salaspermic acid	PTPN11
Salaspermic acid	CD81
Salaspermic acid	ACP1
Salaspermic acid	ACE
Salaspermic acid	PLA2G1B
Salaspermic acid	AGTR1
The bold and underlined genes represent the ten hub targets in the PPI network.

## Sheet: Table S5
GO enrichment analysis of 165 common target genes intersecting IgAN and THH
Category	term	Count	Genes	PValue	Fold Enrichment
BP	positive regulation of transcription from RNA polymerase II promoter	40	YAP1, APP, CD40, PLA2G1B, CD81, NR3C1, HIF1A, EGFR, RXRA, MYC, EP300, JAK2, DRD2, TP63, MAPK3, BRD4, JUN, CREBBP, PARP1, IFNB1, STAT1, VDR, NR1H2, STAT3, NR1H3, FOS, MAPK14, ESR1, IL2, IL4, NFKBIA, TLR9, MDM2, RARB, F2RL1, PPARG, PGR, PPARA, MET, TP53	1.55216e-13	3.93929
BP	cytokine-mediated signaling pathway	38	CD86, CDKN1A, CD80, PTGS2, HIF1A, CCND1, MYC, CASP3, ALOX5, CASP1, TIMP1, JAK2, CCR5, JAK3, JAK1, MCL1, CCR1, HSP90AA1, SYK, NOS2, IFNB1, IFNGR1, MMP1, STAT1, MMP2, MMP3, STAT3, PTPN11, FOS, MMP9, IL2, VAV1, IL4, PIK3CA, BCL2, PTPN6, TP53, BCL2L1	1.93556e-31	13.8802
BP	signal transduction	34	ALK, CD274, PLA2G1B, SRC, C5AR1, NOD1, NR3C1, HIF1A, EGFR, IGF1R, C3, PLAU, ERBB2, CASP1, TIMP1, JAK2, CCR5, PDE8B, PDGFRB, CREBBP, IFNGR1, STAT1, PRKCD, STAT3, MAPK14, ESR1, TGFBR1, CDK4, CDK2, RARB, PDE5A, PPARG, PGR, MET	1.42094e-09	3.33171
BP	negative regulation of apoptotic process	31	CDKN1A, SRC, PTEN, XIAP, AKR1B1, MPO, EGFR, AURKA, IGF1R, EDNRB, MYC, CASP3, KDR, TIMP1, MCL1, PDGFRB, NTRK1, MMP9, IL2, PTK2, IL4, FABP1, NFKBIA, ALB, BCL2, CDK1, MDM2, RARB, TP53, BIRC2, BCL2L1	1.06529e-16	6.86198
BP	positive regulation of cell proliferation	29	CD86, FLT1, PLA2G1B, CD81, PTEN, HTR2A, EGFR, IGF1R, DPP4, EDNRB, MYC, ERBB2, KDR, TIMP1, PDGFRB, F2, TGFBR1, IL2, PTK2, IL4, ADAM17, IFNG, CDK4, CDK2, BCL2, MDM2, PTPN6, AGTR2, BCL2L1	9.68342e-15	6.37145
BP	apoptotic process	29	C5AR1, PTEN, CXCR4, NOD1, NR3C1, CASP8, CASP3, CASP1, EP300, CD14, JAK2, TP63, MCL1, MAPK3, PARP1, PRKCD, MAPK14, TGFBR1, NFKBIA, IFNG, BCL2, CDK1, MDM2, BAX, SGK1, PPIA, TP53, BIRC2, BCL2L1	7.77595e-14	5.85868
BP	G-protein coupled receptor signaling pathway	29	APP, SRC, PTGER2, C5AR1, CXCR4, ECE1, HTR2A, PIK3CG, CRHR1, C3, EDNRB, BDKRB2, BDKRB1, DRD1, JAK2, CCR5, PDE8B, CCR3, CCR1, PDGFRB, F2, RHOA, VAV1, PIK3CA, AGTR1, F2RL1, PTPN6, PPARG, AGTR2	4.61639e-07	2.93688
BP	negative regulation of transcription from RNA polymerase II promoter	28	YAP1, APP, NR3C1, RXRA, EDNRB, CCND1, MYC, EP300, ELANE, TP63, JUN, CREBBP, PARP1, STAT1, VDR, NR1H2, STAT3, NR1H3, ESR1, IL4, IFNG, CDK2, MDM2, RARB, PPARG, PPARA, TP53, PTPN2	3.1656e-08	3.44832
BP	positive regulation of transcription, DNA-templated	27	YAP1, CD86, SRC, CD80, HIF1A, EGFR, RXRA, MYC, EP300, TP63, BRD4, JUN, CREBBP, STAT1, NR1H2, STAT3, NR1H3, FOS, ESR1, TGFBR1, IL4, CDK2, PPARG, AGTR2, PPARA, TP53, BIRC2	6.78947e-11	4.77587
BP	response to drug	25	CDKN1A, MAOB, SRC, PTEN, HTR2A, TYMS, CCND1, MYC, CASP3, DRD1, DRD2, NTRK1, BCHE, JUN, STAT1, FOS, RHOA, ADAM17, FABP3, CDK4, BCL2, CDK1, MDM2, PPARG, TP53	2.22529e-17	10.3131
BP	inflammatory response	25	CD40, PTGER2, C5AR1, CXCR4, NOD1, PTGS2, PIK3CG, PTGS1, C3, POLB, BDKRB2, BDKRB1, CD14, CCR5, CCR3, CCR1, NOS2, PLA2G2A, STAT3, FOS, MTOR, TLR9, AGTR1, F2RL1, AGTR2	5.34867e-14	7.31896
BP	positive regulation of gene expression	24	YAP1, APP, IFNGR1, VDR, EPHX2, NR1H2, STAT3, PTEN, MAPK14, HIF1A, TGFBR1, MTOR, IL4, IFNG, MYC, ERBB2, MDM2, CDK1, TLR9, PGR, PPARG, DRD1, TP53, MAPK3	6.96187e-11	5.48752
BP	positive regulation of cell migration	23	PDGFRB, CCR1, CD274, FLT1, MMP7, F10, MMP2, STAT3, PRKCA, MMP9, RHOA, EGFR, TGFBR1, PTK2, IGF1R, IL4, MMP14, ADAM17, PLAU, KDR, F2RL1, DRD1, JAK2	3.73253e-16	10.5177
BP	proteolysis	23	PRSS1, ACE, MMP7, F10, MME, MMP1, MMP2, MMP3, PREP, PRCP, F2, MMP9, DPP4, ACE2, ADAMTS5, MMP14, ADAM17, CASP8, PSMB5, PLAU, CASP3, CASP1, ELANE	2.06588e-11	6.16723
BP	response to xenobiotic stimulus	22	NTRK1, BCHE, JUN, ACE, MAOB, STAT1, SRC, MMP2, FOS, HTR2A, TYMS, PTGS2, RHOA, ADAM17, CCND1, CDK4, MYC, CASP3, BCL2, CDK1, DRD1, DRD2	9.53542e-16	10.9519
BP	protein phosphorylation	22	NTRK1, APP, SYK, PRKCD, PRKCA, TGFBR1, MTOR, PIK3CG, PTK2, AURKA, PIK3CA, CCND1, CDK4, ERBB2, CDK2, CDK1, JAK2, SGK1, JAK3, JAK1, BRD4, MAPK3	1.74849e-09	5.1398
BP	cell surface receptor signaling pathway	20	CD86, CCR1, CD274, IFNB1, CD80, F2, MAPK14, EGFR, CRHR1, CASP8, EDNRB, IFNG, ERBB2, BDKRB2, CD14, AGTR2, CCR5, MET, BIRC2, MAPK3	1.48241e-11	7.66115
BP	positive regulation of protein kinase B signaling	19	PDGFRB, CD86, APP, HSP90AA1, F10, SRC, CD80, PTPN11, ESR1, EGFR, TGFBR1, MTOR, PIK3CG, VAV1, PTK2, IGF1R, PIK3CA, ERBB2, MET	5.18078e-14	11.5549
BP	positive regulation of ERK1 and ERK2 cascade	19	PDGFRB, CCR1, NTRK1, APP, JUN, SRC, PLA2G2A, C5AR1, PTEN, PRKCA, PTPN11, NOD1, HMGCR, HTR2A, EGFR, KDR, F2RL1, DRD2, MAPK3	7.80226e-13	9.87512
BP	regulation of apoptotic process	19	ALK, CREBBP, HSP90AA1, STAT1, XIAP, NOD1, ESR1, CASP8, CASP1, BAX, PTPN6, JAK2, SGK1, JAK3, TP53, BIRC2, TP63, MCL1, BCL2L1	3.75294e-12	9.00262
BP	negative regulation of gene expression	19	YAP1, CCR1, APP, CDKN1A, ACE, NOS2, VDR, NR1H2, HIF1A, ESR1, AURKA, IFNG, TERT, PIK3CA, MYC, KDR, CDK1, PGR, PPARG	2.37377e-10	7.00516
BP	viral process	19	CREBBP, HSP90AA1, SYK, STAT1, MMP1, SRC, STAT3, RHOA, IGF1R, NFKBIA, PSMB5, MDM2, KDR, BAX, EP300, TP53, CCR3, BRD4, MAPK3	1.08305e-07	4.72922
BP	aging	18	PDGFRB, NTRK1, JUN, ACE, MMP7, MME, MMP2, PTEN, FOS, HMGCR, HTR2A, TYMS, PTGS2, MPO, POLB, EDNRB, TIMP1, MAPK3	4.12157e-13	11.2961
BP	intracellular signal transduction	18	SYK, PLA2G1B, SRC, CD80, PRKCD, PRKCA, NOD1, MAPK14, TGFBR1, ERBB2, PTPN6, AGTR2, JAK2, SGK1, DRD2, JAK3, JAK1, MAPK3	2.29641e-07	4.77229
BP	response to ethanol	17	G6PD, MAOB, HMGCR, TYMS, RHOA, IL2, IGF1R, POLB, RBP4, CASP8, CCND1, MYC, TBXAS1, CDK1, CD14, PPARA, BIRC2	1.43514e-14	15.548
BP	positive regulation of cytosolic calcium ion concentration	17	CCR1, APP, PTGER2, C5AR1, CXCR4, ESR1, IL2, PIK3CG, EDNRB, BDKRB2, AGTR1, F2RL1, BDKRB1, JAK2, CCR5, JAK3, CCR3	2.93131e-13	12.857
BP	response to hypoxia	17	CREBBP, ACE, NOS2, MMP2, CXCR4, HIF1A, RHOA, DPP4, MMP14, ADAM17, PLAU, CASP3, CASP1, EP300, DRD2, PPARA, BIRC2	3.21723e-12	11.0203
BP	positive regulation of protein phosphorylation	17	NTRK1, APP, HSP90AA1, CD40, F2, MMP9, EGFR, PTK2, C3, ADAM17, EDNRB, IFNG, CCND1, ERBB2, KDR, PPIA, MAPK3	1.98248e-11	9.78385
BP	peptidyl-tyrosine phosphorylation	16	PDGFRB, ALK, NTRK1, FLT1, SYK, SRC, PRKCD, EGFR, PTK2, ERBB2, KDR, PTPN6, JAK2, JAK3, MET, JAK1	3.66161e-13	14.3008
BP	angiogenesis	16	PDGFRB, JUN, FLT1, SYK, MMP2, PTEN, PRKCA, PTGS2, MAPK14, HIF1A, PIK3CG, PTK2, MMP14, CASP8, PIK3CA, KDR	2.85278e-09	7.64254
BP	positive regulation of apoptotic process	16	PDGFRB, APP, JUN, ACE, SRC, MMP2, PTGS2, MMP9, VAV1, CASP8, CDK4, CASP3, BAX, RARB, TP53, MCL1	7.61324e-07	4.99393
BP	negative regulation of cell proliferation	16	NTRK1, BCHE, APP, CDKN1A, JUN, VDR, STAT3, PTEN, PTGS2, FABP3, RARB, PTPN6, JAK2, DRD2, TP53, PTPN2	7.77588e-06	4.13065
BP	neutrophil degranulation	16	HSP90AA1, MME, PRKCD, C5AR1, PRCP, MAPK14, MPO, MMP9, RHOA, C3, PLAU, ALOX5, PTPN6, CD14, PPIA, ELANE	1.45988e-05	3.91641
BP	response to lipopolysaccharide	15	JUN, ACE, MAOB, NOS2, PTGER2, C5AR1, FOS, PTGS2, MPO, ADAM17, CASP8, CASP3, BDKRB1, JAK2, ELANE	5.3585e-11	11.4176
BP	regulation of cell proliferation	15	ALK, JUN, NOS2, STAT1, PTGER2, STAT3, XIAP, PTK2, PTGS1, NFKBIA, ACE2, PLAU, AGTR1, SGK1, BIRC2	8.22146e-11	11.0608
BP	cellular response to lipopolysaccharide	15	CD86, CD274, CD40, NOS2, SRC, CD80, NR1H3, MAPK14, RHOA, EDNRB, CDK4, CASP1, CD14, JAK2, CCR5	8.06445e-10	9.31435
BP	MAPK cascade	15	PDGFRB, EGFR, IL2, PTK2, PSMB5, PIK3CA, MYC, ERBB2, JAK2, CCR5, JAK3, MET, JAK1, BCL2L1, MAPK3	3.06913e-07	5.82147
BP	immune response	15	CD86, CCR1, CD274, CD80, C5AR1, CXCR4, IL2, VAV1, CRHR1, IGF1R, IL4, C3, TLR9, CCR5, CCR3	5.49398e-05	3.70235
BP	cell differentiation	15	NTRK1, SYK, SRC, VDR, NR1H2, NR1H3, EGFR, PTK2, RXRA, RARB, PTPN6, PPARG, JAK2, PPARA, MCL1	0.00150324	2.66525
BP	response to toxic substance	14	PDGFRB, CDKN1A, KDM5C, MAOB, EPHX2, FOS, TYMS, CDK4, MDM2, BCL2, CDK1, BAX, DRD2, MAPK3	3.96084e-13	18.9856
BP	platelet activation	14	CD40, SYK, SRC, PRKCD, PRKCA, PTPN11, F2, MAPK14, PIK3CG, VAV1, PIK3CA, PTPN6, PPIA, MAPK3	9.77307e-12	14.8806
BP	protein autophosphorylation	14	PDGFRB, ALK, NTRK1, FLT1, SYK, SRC, EGFR, MTOR, PTK2, AURKA, IGF1R, ERBB2, KDR, JAK2	3.95393e-09	9.22762
BP	cellular response to DNA damage stimulus	14	YAP1, CDKN1A, PARP1, XIAP, POLB, CCND1, MYC, CASP3, BCL2, SGK1, TP53, TP63, BRD4, MAPK3	3.86975e-07	6.25661
BP	protein deubiquitination	14	PTEN, HIF1A, ESR1, RHOA, TGFBR1, POLB, NFKBIA, PSMB5, MYC, MDM2, CDK1, EP300, TP53, BIRC2	4.23314e-07	6.20956
BP	positive regulation of phosphatidylinositol 3-kinase signaling	13	PDGFRB, NTRK1, FLT1, SRC, F2, PIK3CG, PTK2, IGF1R, PIK3CA, KDR, F2RL1, PTPN6, JAK2	2.23378e-11	16.3166
BP	transmembrane receptor protein tyrosine kinase signaling pathway	13	PDGFRB, ALK, NTRK1, FLT1, SYK, SRC, EGFR, PTK2, IGF1R, ERBB2, KDR, BDKRB2, MET	1.23999e-09	11.6194
BP	peptidyl-serine phosphorylation	13	SYK, SRC, PRKCD, PRKCA, MAPK14, TGFBR1, MTOR, AURKA, CDK2, BCL2, CDK1, SGK1, MAPK3	2.68144e-08	8.86568
BP	heart development	13	CDKN1A, MMP2, PTEN, ECE1, PTPN11, TGFBR1, RBP4, CASP8, CASP3, ERBB2, EP300, PPARG, PPARA	2.75809e-07	7.16711
BP	negative regulation of transcription, DNA-templated	13	JUN, KDM5C, SRC, VDR, NR1H2, NR3C1, HDAC6, IL4, IFNG, MDM2, PPARG, TP53, TP63	0.00377698	2.64442
BP	positive regulation of smooth muscle cell proliferation	12	PDGFRB, PIK3CA, STAT1, MYC, MMP2, AKR1B1, HMGCR, PTGS2, EGFR, ELANE, MTOR, IGF1R	1.09353e-11	20.8203
BP	positive regulation of inflammatory response	12	NFKBIA, APP, ACE, IFNG, PLA2G2A, CASP1, AGTR1, TLR9, JAK2, PLA2G7, EGFR, IL2	1.10469e-09	13.7454
BP	cellular response to hypoxia	12	FABP1, TERT, SRC, MYC, PTEN, MDM2, BCL2, PPARG, PTGS2, HIF1A, TP53, MTOR	1.3243e-08	10.8906
BP	transcription initiation from RNA polymerase II promoter	12	YAP1, CREBBP, RXRA, VDR, NR1H2, RARB, NR1H3, PGR, PPARG, PPARA, NR3C1, ESR1	4.13646e-08	9.764
BP	positive regulation of MAPK cascade	12	NTRK1, ALK, APP, FLT1, CD81, ERBB2, TLR9, KDR, JAK2, PPIA, TGFBR1, IGF1R	1.06746e-07	8.90428
BP	positive regulation of angiogenesis	12	NTRK1, C3, CD40, FLT1, TERT, CMA1, STAT3, C5AR1, KDR, PRKCA, HIF1A, CCR3	1.21234e-07	8.79367
BP	regulation of cell cycle	12	CDKN1A, JUN, CDK4, STAT3, PTEN, MDM2, EP300, BAX, XIAP, TP53, TGFBR1, BIRC2	1.18655e-05	5.50887
BP	cell migration	12	PDGFRB, FLT1, PIK3CA, MMP2, PTEN, CDK1, KDR, BDKRB1, MET, PTK2, RHOA, PIK3CG	1.23545e-05	5.48752
BP	multicellular organism development	12	NTRK1, PDGFRB, ALK, FLT1, VDR, ERBB2, KDR, F2, MET, EGFR, IGF1R, MCL1	0.00797281	2.52818
BP	extracellular matrix disassembly	11	ADAMTS5, MMP14, PRSS1, MMP7, MMP1, CMA1, MMP2, MMP3, TIMP1, MMP9, ELANE	2.23786e-10	19.3701
BP	positive regulation of MAP kinase activity	11	PDGFRB, CD40, FLT1, PLA2G1B, SRC, ERBB2, PDE5A, HTR2A, EGFR, ELANE, PIK3CG	1.19227e-09	16.4278
BP	regulation of inflammatory response	11	ACE2, CMA1, ALOX5, CASP1, AGTR1, XIAP, JAK2, PTGS2, ESR1, BIRC2, BRD4	3.91551e-09	14.582
BP	activation of MAPK activity	11	ALK, APP, PLA2G1B, CD81, C5AR1, CXCR4, PTPN11, NOD1, MAPK14, PPIA, MAPK3	6.59966e-08	10.9059
BP	positive regulation of NF-kappaB transcription factor activity	11	NTRK1, NFKBIA, ALK, APP, CD40, PLA2G1B, STAT3, TLR9, EP300, NOD1, PPIA	2.02381e-06	7.54534
BP	extracellular matrix organization	11	ADAMTS5, APP, MMP14, MMP7, MMP1, COL4A4, MMP2, COL7A1, MMP3, KDR, MMP9	7.34877e-05	4.99153
BP	nervous system development	11	NTRK1, YAP1, APP, EDNRB, STAT3, PTEN, EP300, FOS, HMGCR, MET, TGFBR1	0.00164263	3.36217
BP	innate immune response	11	APP, SYK, SRC, TLR9, F2RL1, NOD1, PPARG, CD14, JAK3, PTK2, PIK3CG	0.032142	2.14867
BP	positive regulation of pri-miRNA transcription from RNA polymerase II promoter	10	JUN, TERT, NR1H2, MYC, STAT3, PPARG, FOS, NR3C1, HIF1A, TP53	1.44376e-10	25.6482
BP	response to mechanical stimulus	10	MMP14, JUN, STAT1, SRC, MMP2, BDKRB2, BDKRB1, PPARG, MPO, RHOA	2.36984e-09	19.0293
BP	positive regulation of kinase activity	10	NTRK1, PDGFRB, ALK, FLT1, ERBB2, KDR, MET, EGFR, IL2, IGF1R	1.04796e-08	16.1619
BP	positive regulation of cell growth	10	YAP1, MMP14, ADAM17, ERBB2, BCL2, F2, RHOA, EGFR, TGFBR1, IL2	5.00743e-08	13.5611
BP	viral entry into host cell	10	CD86, ACE2, CD81, CD80, CDK1, AGTR1, CXCR4, HTR2A, CCR5, EGFR	1.55054e-07	11.9173
BP	positive regulation of tumor necrosis factor production	10	APP, IFNG, SYK, IFNGR1, STAT3, TLR9, PTPN11, NOD1, CD14, JAK2	2.57835e-07	11.2364
BP	response to estradiol	10	PDGFRB, CASP8, CCND1, MYC, CASP3, STAT3, PTEN, PTGS2, ESR1, CYP19A1	4.48358e-07	10.5341
BP	negative regulation of neuron apoptotic process	10	NTRK1, JUN, TERT, PIK3CA, C5AR1, BCL2, BAX, JAK2, RHOA, BCL2L1	5.74717e-06	7.76195
BP	regulation of signal transduction by p53 class mediator	10	CDK2, MDM2, CDK1, EP300, MAPK14, SGK1, TP53, TP63, MTOR, AURKA	6.73552e-06	7.61172
BP	neuron apoptotic process	9	POLB, APP, CASP3, BCL2, BAX, XIAP, TP53, TP63, BCL2L1	3.53066e-09	23.5963
BP	response to cytokine	9	CD274, JUN, STAT1, BCL2, FOS, TIMP1, TYMS, BCL2L1, MCL1	1.17256e-08	20.4199
BP	T cell costimulation	9	DPP4, CD86, CD274, PIK3CA, SRC, CD80, PTPN6, PTPN11, VAV1	1.59823e-08	19.6636
BP	cellular response to cytokine stimulus	9	MME, STAT1, STAT3, CASP1, CXCR4, PTPN6, PTPN11, RHOA, PTPN2	2.48448e-08	18.6287
BP	positive regulation of interleukin-8 production	9	SYK, NOS2, PLA2G1B, STAT3, TLR9, F2RL1, NOD1, CD14, ELANE	6.33087e-08	16.5912
BP	vascular endothelial growth factor receptor signaling pathway	9	HSP90AA1, FLT1, PIK3CA, SRC, KDR, MAPK14, VAV1, PTK2, RHOA	8.09887e-08	16.0884
BP	cellular response to mechanical stimulus	9	CD40, CASP8, MMP7, CASP1, PTPN11, PTGS2, EGFR, IGF1R, MAPK3	4.92718e-07	12.7932
BP	positive regulation of peptidyl-tyrosine phosphorylation	9	SYK, SRC, CD81, CD80, PTPN11, HTR2A, JAK2, TP53, MTOR	1.50997e-06	11.0608
BP	wound healing	9	PDGFRB, YAP1, CDKN1A, CASP3, ERBB2, PPARA, EGFR, TGFBR1, MTOR	1.90833e-06	10.7256
BP	positive regulation of interleukin-6 production	9	APP, IFNG, SYK, NOS2, STAT3, TLR9, F2RL1, PTPN11, NOD1	2.39279e-06	10.4102
BP	transforming growth factor beta receptor signaling pathway	9	JUN, PARP1, SRC, STAT3, FOS, TP53, PTK2, RHOA, TGFBR1	3.43222e-06	9.9237
BP	glucose homeostasis	9	RBP4, ALOX5, STAT3, PTPN11, PRCP, PPARG, HIF1A, PTPN2, IGF1R	5.51355e-06	9.31435
BP	negative regulation of inflammatory response	9	IL4, ALOX5, PRKCD, NR1H3, PPARG, PPARA, IL2, ELANE, PTPN2	1.29666e-05	8.29559
BP	positive regulation of I-kappaB kinase/NF-kappaB signaling	9	CD40, CASP8, CASP1, TLR9, F2RL1, NOD1, RHOA, BIRC2, BRD4	0.000219726	5.55935
BP	leukocyte migration	9	PIK3CA, MMP1, SRC, F2RL1, PTPN6, PTPN11, F2, PPIA, MMP9	0.000261786	5.41753
BP	defense response to virus	9	CD40, IFNG, IFNB1, IFNGR1, STAT1, BCL2, TLR9, F2RL1, BCL2L1	0.000600234	4.78304
BP	adaptive immune response	9	CD86, CD274, IFNG, SYK, IFNB1, JAK2, JAK3, IL2, PIK3CG	0.0370896	2.35963
BP	positive regulation of nitric oxide biosynthetic process	8	APP, HSP90AA1, IFNG, AGTR2, JAK2, PTGS2, ESR1, MTOR	1.45741e-07	19.6636
BP	positive regulation of fibroblast proliferation	8	PDGFRB, CDKN1A, JUN, PLA2G1B, CDK4, MYC, ESR1, EGFR	2.57438e-07	18.151
BP	cellular response to UV	8	CREBBP, PARP1, MYC, PRKCD, EP300, BAX, PTGS2, TP53	3.36012e-07	17.4788
BP	positive regulation of interleukin-1 beta production	8	APP, CASP8, IFNG, STAT3, CASP1, F2RL1, NOD1, JAK2	1.09833e-06	14.7477
BP	response to estrogen	8	PDGFRB, MMP14, CCND1, CA2, MMP2, EP300, PPARG, ESR1	1.84144e-06	13.679
BP	positive regulation of NIK/NF-kappaB signaling	8	CD86, APP, TLR9, EP300, NOD1, CD14, RHOA, EGFR	2.03167e-06	13.4836
BP	cellular response to insulin stimulus	8	PARP1, STAT1, PLA2G1B, SRC, CDK4, MYC, PTEN, PPARG	3.83759e-05	8.65921
BP	tumor necrosis factor-mediated signaling pathway	8	NFKBIA, ADAM17, CD40, PSMB5, STAT1, JAK2, TP53, BIRC2	0.000101419	7.43192
BP	Fc-gamma receptor signaling pathway involved in phagocytosis	8	HSP90AA1, SYK, PIK3CA, SRC, PRKCD, VAV1, PTK2, MAPK3	0.000148546	6.99151
BP	cell proliferation	8	YAP1, SRC, MYC, STAT3, BCL2, CDK1, TP63, BCL2L1	0.000261767	6.37739
BP	defense response to bacterium	8	ADAMTS5, SYK, NOS2, PRKCD, TLR9, NOD1, MPO, ELANE	0.00340282	4.10371
BP	axon guidance	8	NTRK1, PIK3CA, SRC, CXCR4, PTPN11, PRKCA, PTK2, MAPK3	0.00382626	4.0164
BP	regulation of gene expression	8	APP, PIK3CA, CDK4, MYC, CDK2, BCL2, HIF1A, TGFBR1	0.00525218	3.79058
BP	cell cycle	8	SRC, PRKCD, EP300, NR3C1, TP53, TP63, AURKA, MAPK3	0.0322651	2.63646
BP	interleukin-6-mediated signaling pathway	7	YAP1, STAT1, SRC, STAT3, PTPN11, JAK2, JAK1	8.07566e-09	43.4669
BP	microglial cell activation	7	IL4, APP, JUN, IFNG, IFNGR1, C5AR1, JAK2	1.31869e-07	28.4783
BP	response to antibiotic	7	HSP90AA1, CASP8, CASP3, MDM2, JAK2, TP53, JAK1	2.0157e-07	26.641
BP	extrinsic apoptotic signaling pathway in absence of ligand	7	IL4, CASP3, BCL2, BAX, IL2, BCL2L1, MCL1	2.99023e-07	25.0264
BP	positive regulation of reactive oxygen species metabolic process	7	PDGFRB, ACE2, CDKN1A, AGTR1, F2, MAPK14, TP53	4.32164e-07	23.5963
BP	positive regulation of B cell proliferation	7	IL4, CDKN1A, CD40, CD81, BCL2, TLR9, IL2	1.53529e-06	19.2063
BP	ovarian follicle development	7	MMP14, MYC, MMP2, BCL2, KDR, BAX, BCL2L1	2.02287e-06	18.3527
BP	hormone-mediated signaling pathway	7	RXRA, RARB, NR1H3, PTPN11, PPARG, PPARA, CRHR1	3.81173e-06	16.5174
BP	regulation of transcription initiation from RNA polymerase II promoter	7	CDKN1A, CCND1, CDK4, PTEN, CDK1, BAX, TP53	6.02541e-06	15.2939
BP	DNA damage response, signal transduction by p53 class mediator resulting in cell cycle arrest	7	CDKN1A, MDM2, CDK1, EP300, BAX, TP53, AURKA	9.18411e-06	14.2392
BP	learning or memory	7	NTRK1, APP, MME, CASP3, PTEN, EP300, EGFR	1.3567e-05	13.3205
BP	cell chemotaxis	7	PDGFRB, CCR1, PRKCD, AGTR1, CXCR4, CCR5, CCR3	2.96946e-05	11.632
BP	interferon-gamma-mediated signaling pathway	7	IFNG, IFNGR1, STAT1, PRKCD, JAK2, TP53, JAK1	3.21703e-05	11.4704
BP	cellular response to hydrogen peroxide	7	FABP1, SRC, PRKCD, MDM2, CDK1, PTPN11, HDAC6	3.48091e-05	11.3133
BP	regulation of blood pressure	7	ACE, EDNRB, PPARG, AGTR2, SGK1, PTGS2, PTGS1	3.48091e-05	11.3133
BP	positive regulation of endothelial cell proliferation	7	JUN, KDR, PRKCA, HIF1A, CCR3, TGFBR1, MTOR	3.76188e-05	11.1604
BP	circadian rhythm	7	NTRK1, JUN, NOS2, CDK4, EP300, TYMS, EGFR	4.37839e-05	10.8667
BP	rhythmic process	7	KDM5C, CREBBP, CDK1, EP300, PPARG, TP53, MTOR	5.07331e-05	10.5881
BP	B cell differentiation	7	NTRK1, IL4, ADAM17, IFNB1, EP300, JAK3, PTPN2	5.4524e-05	10.4541
BP	calcium-mediated signaling	7	CCR1, APP, EDNRB, AGTR1, CXCR4, CCR5, CCR3	8.78608e-05	9.60316
BP	ephrin receptor signaling pathway	7	NTRK1, SRC, MMP2, PTPN11, MMP9, PTK2, RHOA	9.37183e-05	9.49278
BP	positive regulation of peptidyl-serine phosphorylation	7	APP, HSP90AA1, PIK3CA, BCL2, PTGS2, EGFR, HDAC6	0.00012033	9.07552
BP	regulation of protein stability	7	TERT, CD81, CASP3, PTEN, BCL2, HDAC6, AURKA	0.000135712	8.88034
BP	male gonad development	7	PDGFRB, MMP14, ACE, BCL2, ESR1, TGFBR1, BCL2L1	0.000322817	7.57681
BP	response to oxidative stress	7	APP, MMP14, PSMB5, PTGS2, MPO, TP53, PTGS1	0.000516321	6.9401
BP	kidney development	7	ACE, MME, CA2, AGTR1, BAX, RHOA, TGFBR1	0.000615085	6.71441
BP	chemotaxis	7	CCR1, PLAU, C5AR1, CXCR4, CCR5, MAPK14, CCR3	0.000615085	6.71441
BP	macromolecular complex assembly	7	YAP1, CREBBP, CD40, MDM2, CDK1, TP53, MAPK3	0.000856138	6.30437
BP	cellular protein metabolic process	7	C3, APP, MMP1, MMP2, ALB, TIMP1, F2	0.00171887	5.50581
BP	Fc-epsilon receptor signaling pathway	7	JUN, PSMB5, SYK, PIK3CA, FOS, VAV1, MAPK3	0.00339901	4.80158
BP	negative regulation of inflammatory response to antigenic stimulus	7	ADAM17, SYK, SRC, PTGER2, DRD1, MAPK14, CRHR1	0.00907568	3.91409
BP	cellular response to UV-A	6	MME, MMP1, MMP2, MMP3, TIMP1, MMP9	1.76941e-08	64.3537
BP	regulation of interferon-gamma-mediated signaling pathway	6	IFNG, IFNGR1, STAT1, JAK2, PTPN2, JAK1	4.86227e-08	54.4531
BP	positive regulation of nitric-oxide synthase biosynthetic process	6	IFNG, STAT1, TLR9, KDR, JAK2, JAK3	3.12847e-07	39.3272
BP	negative regulation of anoikis	6	PIK3CA, SRC, BCL2, PTK2, BCL2L1, MCL1	3.12847e-07	39.3272
BP	peptidyl-tyrosine autophosphorylation	6	NTRK1, SRC, KDR, EGFR, IGF1R, MAPK3	3.12847e-07	39.3272
BP	response to gamma radiation	6	POLB, PARP1, MYC, BCL2, BAX, TP53	4.02316e-06	24.41
BP	regulation of sequence-specific DNA binding transcription factor activity	6	JUN, SYK, FOS, MAPK14, SGK1, MAPK3	4.02316e-06	24.41
BP	positive regulation of apoptotic signaling pathway	6	IFNB1, PRKCD, PTEN, JAK2, TP63, TGFBR1	4.79506e-06	23.5963
BP	ERBB2 signaling pathway	6	HSP90AA1, PIK3CA, SRC, ERBB2, PRKCA, EGFR	5.67842e-06	22.8352
BP	cellular response to reactive oxygen species	6	JUN, MMP2, FOS, MMP9, EGFR, MAPK3	1.39853e-05	19.1322
BP	mRNA transcription from RNA polymerase II promoter	6	RXRA, VDR, STAT3, C5AR1, NR1H3, PPARG	1.59952e-05	18.6287
BP	phosphatidylinositol 3-kinase signaling	6	PIK3CA, ERBB2, PTEN, HTR2A, PIK3CG, IGF1R	1.59952e-05	18.6287
BP	positive regulation of interleukin-10 production	6	IL4, CD274, SYK, STAT3, TLR9, F2RL1	2.33991e-05	17.2656
BP	positive regulation of neuron death	6	APP, CASP8, IFNG, PARP1, FOS, MTOR	2.63813e-05	16.8545
BP	positive regulation of protein import into nucleus	6	IFNG, PRKCD, CDK1, JAK2, MAPK14, PTGS2	2.96506e-05	16.4626
BP	collagen catabolic process	6	MMP14, MMP7, MMP1, MMP2, MMP3, MMP9	2.96506e-05	16.4626
BP	positive regulation of chemokine production	6	APP, ADAM17, IFNG, TLR9, F2RL1, HIF1A	3.71259e-05	15.7309
BP	animal organ regeneration	6	CDKN1A, ACE, CDK4, C5AR1, CDK1, PPARG	4.59839e-05	15.0615
BP	visual learning	6	APP, DRD1, HMGCR, DRD2, HIF1A, MTOR	4.59839e-05	15.0615
BP	epidermal growth factor receptor signaling pathway	6	ADAM17, PIK3CA, SRC, PTPN11, PTK2, EGFR	6.2236e-05	14.1578
BP	positive regulation of vascular smooth muscle cell proliferation	6	JUN, TERT, MMP2, MDM2, JAK2, MMP9	6.85344e-05	13.8802
BP	negative regulation of autophagy	6	STAT3, BCL2, MET, MTOR, BCL2L1, MCL1	6.85344e-05	13.8802
BP	response to hydrogen peroxide	6	PDGFRB, JUN, STAT1, CASP3, MMP2, BCL2	8.25963e-05	13.3564
BP	response to nutrient levels	6	NTRK1, ACE, MMP7, SRC, NR1H2, MTOR	8.25963e-05	13.3564
BP	sensory perception of pain	6	ACE, EDNRB, MME, BDKRB1, PTGS2, MAPK3	9.04096e-05	13.1091
BP	positive regulation of cysteine-type endopeptidase activity involved in apoptotic process	6	APP, SYK, MYC, CASP1, NOD1, RHOA	9.04096e-05	13.1091
BP	positive regulation of Notch signaling pathway	6	YAP1, CREBBP, SRC, STAT3, EP300, TP63	9.8779e-05	12.8707
BP	phosphatidylinositol-mediated signaling	6	NTRK1, PDGFRB, PIK3CA, RHOA, PIK3CG, IGF1R	9.8779e-05	12.8707
BP	response to activity	6	PIK3CA, MMP2, PTEN, CDK1, CXCR4, MTOR	0.000107731	12.6409
BP	positive regulation of neuron apoptotic process	6	APP, JUN, CASP3, BAX, TP53, RHOA	0.000117292	12.4191
BP	positive regulation of T cell proliferation	6	IL4, CD86, CD274, CD80, JAK2, JAK3	0.000219186	10.8906
BP	response to glucocorticoid	6	BCHE, CASP3, BCL2, TYMS, PTGS2, RHOA	0.000235553	10.7256
BP	apoptotic signaling pathway	6	CASP8, CASP3, CASP1, BAX, PRKCA, CD14	0.000310491	10.1127
BP	positive regulation of tyrosine phosphorylation of STAT protein	6	IL4, CD40, IFNG, STAT3, JAK2, IL2	0.000331764	9.97029
BP	peptidyl-threonine phosphorylation	6	PRKCD, BCL2, CDK1, PRKCA, TGFBR1, MTOR	0.000331764	9.97029
BP	negative regulation of cysteine-type endopeptidase activity involved in apoptotic process	6	FABP1, SRC, MDM2, XIAP, PTGS2, BIRC2	0.0003776	9.69713
BP	negative regulation of protein binding	6	CDKN1A, ACE, PRKCD, BAX, PPARA, AURKA	0.000455129	9.31435
BP	positive regulation of interferon-gamma production	6	APP, TLR9, F2RL1, CD14, JAK2, IL2	0.000544085	8.96064
BP	intracellular receptor signaling pathway	6	RXRA, NR1H2, STAT3, EP300, NR1H3, PPARA	0.000576454	8.84863
BP	negative regulation of protein phosphorylation	6	PTEN, BDKRB1, DRD2, PPIA, IL2, MTOR	0.000610248	8.73939
BP	neutrophil chemotaxis	6	SYK, PLA2G1B, C5AR1, PPIA, VAV1, PIK3CG	0.000610248	8.73939
BP	positive regulation of translation	6	CDK4, MYC, ERBB2, RHOA, MTOR, MAPK3	0.000645506	8.63281
BP	regulation of lipid metabolic process	6	FABP1, CREBBP, RXRA, PPARG, HMGCR, PPARA	0.000682269	8.5288
BP	protein import into nucleus	6	NFKBIA, CDKN1A, SYK, STAT3, DRD1, TP53	0.00131592	7.37386
BP	cellular calcium ion homeostasis	6	CCR1, CD40, VDR, HTR2A, DRD2, ELANE	0.00212561	6.6158
BP	response to virus	6	IFNG, IFNB1, IFNGR1, SRC, CXCR4, BCL2L1	0.00280063	6.20956
BP	defense response to Gram-positive bacterium	6	APP, ADAM17, PLA2G1B, PLA2G2A, C5AR1, NOD1	0.00290837	6.15557
BP	positive regulation of sequence-specific DNA binding transcription factor activity	6	APP, PTEN, EP300, PPARG, JAK2, ESR1	0.00336945	5.94866
BP	stimulatory C-type lectin receptor signaling pathway	6	CREBBP, PSMB5, SYK, SRC, PRKCD, EP300	0.00349248	5.89909
BP	Notch signaling pathway	6	APP, ADAM17, CREBBP, MYC, EP300, TP63	0.0036187	5.85033
BP	phosphorylation	6	ALK, PIK3CA, STAT3, MTOR, PIK3CG, MAPK3	0.00444577	5.57394
BP	negative regulation of cell growth	6	CDKN1A, BCL2, BDKRB1, PPARG, AGTR2, TP53	0.00474911	5.48752
BP	cell cycle arrest	6	CDKN1A, IFNG, MYC, TP53, TGFBR1, MTOR	0.00539946	5.32248
BP	blood coagulation	6	F10, IFNB1, PLAU, F2RL1, F2, JAK2	0.0239662	3.66783
BP	protein stabilization	6	CDKN1A, HSP90AA1, PRKCD, PTEN, EP300, TP53	0.0273886	3.53945
BP	negative regulation of macrophage derived foam cell differentiation	5	NFKBIA, NR1H2, NR1H3, PPARG, PPARA	3.2711e-06	45.3776
BP	astrocyte activation	5	APP, IFNG, IFNGR1, C5AR1, EGFR	1.06055e-05	34.7005
BP	response to muscle stretch	5	NFKBIA, JUN, PIK3CA, FOS, MAPK14	1.35463e-05	32.7727
BP	response to hyperoxia	5	PDGFRB, POLB, CDKN1A, CDK4, MMP2	1.35463e-05	32.7727
BP	response to iron ion	5	CCND1, MDM2, BCL2, DRD2, HIF1A	1.70462e-05	31.0478
BP	regulation of vasoconstriction	5	ACE2, ACE, BDKRB2, AGTR1, ECE1	2.11681e-05	29.4954
BP	positive regulation of superoxide anion generation	5	APP, SYK, PRKCD, F2RL1, EGFR	2.59776e-05	28.0909
BP	granulocyte differentiation	5	CDKN1A, RXRA, CDK4, CDK2, EP300	3.15425e-05	26.814
BP	release of cytochrome c from mitochondria	5	JUN, BCL2, BAX, TP53, BCL2L1	3.15425e-05	26.814
BP	negative regulation of proteolysis	5	NR1H2, NR1H3, F2, TP53, HDAC6	4.52216e-05	24.5795
BP	arachidonic acid secretion	5	ACE, PLA2G1B, PLA2G2A, BDKRB2, DRD2	5.3483e-05	23.5963
BP	positive regulation of glycolytic process	5	APP, IFNG, MYC, HTR2A, HIF1A	5.3483e-05	23.5963
BP	positive regulation of nitric-oxide synthase activity	5	TERT, NOD1, AGTR2, HIF1A, ESR1	6.27936e-05	22.6888
BP	positive regulation of cholesterol efflux	5	NFKBIA, RXRA, NR1H2, NR1H3, PPARG	7.32321e-05	21.8485
BP	negative regulation of intrinsic apoptotic signaling pathway	5	SRC, BCL2, MMP9, BCL2L1, MCL1	8.48787e-05	21.0682
BP	positive regulation of G2/M transition of mitotic cell cycle	5	APP, CCND1, CDK4, CDK1, BRD4	9.78156e-05	20.3417
BP	cell aging	5	BCL2, CDK1, TP53, TP63, MTOR	9.78156e-05	20.3417
BP	cellular response to gamma radiation	5	YAP1, CDKN1A, MDM2, TP53, BCL2L1	0.000127897	19.0293
BP	positive regulation of mitotic cell cycle	5	APP, MDM2, CDK1, PTPN11, PRKCA	0.000145213	18.4346
BP	endothelial cell migration	5	DPP4, PIK3CA, PTEN, RHOA, TGFBR1	0.000164163	17.876
BP	positive regulation of protein localization to nucleus	5	YAP1, PARP1, SRC, CDK1, F2	0.000184836	17.3503
BP	response to tumor necrosis factor	5	CASP8, CASP3, CD14, JAK2, PTGS2	0.000207324	16.8545
BP	cellular response to dexamethasone stimulus	5	AGTR2, JAK2, NR3C1, EGFR, IGF1R	0.000231717	16.3863
BP	vasodilation	5	EDNRB, BDKRB2, F2RL1, DRD1, AGTR2	0.000258108	15.9435
BP	positive regulation of vasoconstriction	5	ACE, TBXAS1, HTR2A, PTGS2, EGFR	0.000258108	15.9435
BP	positive regulation of epithelial cell migration	5	JUN, IFNG, SRC, HIF1A, HDAC6	0.000286592	15.5239
BP	cell motility	5	MMP14, ADAM17, PTEN, PTK2, TGFBR1	0.000286592	15.5239
BP	JAK-STAT cascade	5	IFNG, STAT1, STAT3, JAK2, JAK1	0.000286592	15.5239
BP	placenta development	5	MME, PPARG, MAPK14, PTK2, BIRC2	0.000317263	15.1259
BP	liver regeneration	5	CCND1, MYC, TYMS, EGFR, AURKA	0.000317263	15.1259
BP	cellular senescence	5	CDKN1A, CDK2, PRKCD, MAPK14, IGF1R	0.000350216	14.7477
BP	response to nicotine	5	CASP3, MMP2, BCL2, DRD2, IGF1R	0.000350216	14.7477
BP	cellular response to cadmium ion	5	JUN, FOS, MMP9, EGFR, MAPK3	0.000385548	14.388
BP	positive regulation of interleukin-12 production	5	CD40, IFNG, SYK, TLR9, MAPK14	0.000463735	13.7188
BP	response to progesterone	5	YAP1, PTGER2, NR1H3, FOS, TYMS	0.000552606	13.1091
BP	negative regulation of T cell proliferation	5	CD86, CD274, CD80, PTPN6, PDE5A	0.000601295	12.8241
BP	negative regulation of receptor activity	5	ACE2, PTEN, PPARG, AGTR2, PPARA	0.000652952	12.5512
BP	intrinsic apoptotic signaling pathway in response to DNA damage	5	POLB, BCL2, BAX, BCL2L1, MCL1	0.000652952	12.5512
BP	positive regulation of blood vessel endothelial cell migration	5	ADAM17, CD40, KDR, PRKCA, HIF1A	0.000826727	11.7982
BP	protein destabilization	5	CREBBP, SRC, MDM2, EP300, HDAC6	0.000891254	11.5668
BP	cellular response to virus	5	HSP90AA1, IFNB1, BAX, MAPK14, HIF1A	0.00118505	10.7256
BP	positive regulation of protein complex assembly	5	IFNG, SYK, MMP1, MMP3, BAX	0.00118505	10.7256
BP	response to organic cyclic compound	5	MMP14, G6PD, EDNRB, CDK1, PPARA	0.00144567	10.1708
BP	positive regulation of epithelial cell proliferation	5	YAP1, MYC, ERBB2, C5AR1, EGFR	0.00208212	9.21732
BP	phospholipase C-activating G-protein coupled receptor signaling pathway	5	EDNRB, C5AR1, AGTR1, HTR2A, ESR1	0.00208212	9.21732
BP	regulation of circadian rhythm	5	CDK1, NR1H3, PPARG, PPARA, MTOR	0.00220428	9.07552
BP	cellular response to drug	5	NOS2, MYC, CXCR4, TP53, EGFR	0.00220428	9.07552
BP	I-kappaB kinase/NF-kappaB signaling	5	NFKBIA, EDNRB, TLR9, CD14, BIRC2	0.00288981	8.42726
BP	regulation of insulin secretion	5	DPP4, IFNG, NOS2, ALOX5, PRKCA	0.00288981	8.42726
BP	protein processing	5	MMP14, ADAM17, MME, CASP3, ECE1	0.00304253	8.30857
BP	G1/S transition of mitotic cell cycle	5	CDKN1A, CCND1, CDK4, MYC, CDK2	0.00353359	7.97174
BP	cellular oxidant detoxification	5	FABP1, ALOX5AP, ALB, PTGS2, PTGS1	0.00407592	7.66115
BP	response to nutrient	5	STAT1, PTEN, PPARG, HMGCR, MTOR	0.00407592	7.66115
BP	regulation of cellular response to heat	5	HSP90AA1, CREBBP, EP300, MTOR, MAPK3	0.00407592	7.66115
BP	regulation of G2/M transition of mitotic cell cycle	5	CDKN1A, HSP90AA1, CDK2, CDK1, AURKA	0.00510021	7.19401
BP	axonogenesis	5	APP, BCL2, PTPN11, DRD2, IGF1R	0.0053239	7.10733
BP	multicellular organism growth	5	EP300, RARB, PTPN11, TP53, MTOR	0.00628422	6.78056
BP	negative regulation of transforming growth factor beta receptor signaling pathway	5	ADAM17, PPARG, PPARA, TP53, TGFBR1	0.00654108	6.70351
BP	lung development	5	MMP14, RBP4, MME, EP300, EGFR	0.00680481	6.62819
BP	activation of cysteine-type endopeptidase activity involved in apoptotic process	5	CASP8, BAX, NOD1, PPARG, JAK2	0.0070755	6.55454
BP	memory	5	APP, PTEN, DRD1, HTR2A, PTGS2	0.0070755	6.55454
BP	Ras protein signal transduction	5	CDKN1A, JUN, CDK2, MAPK14, TP53	0.007638	6.41205
BP	positive regulation of JNK cascade	5	APP, TLR9, F2RL1, XIAP, NOD1	0.0085357	6.20956
BP	cholesterol homeostasis	5	FABP3, NR1H2, EPHX2, NR1H3, HMGCR	0.0108918	5.78342
BP	peptidyl-tyrosine dephosphorylation	5	PTEN, PTPN6, PTPN11, ACP1, PTPN2	0.0108918	5.78342
BP	integrin-mediated signaling pathway	5	SYK, SRC, PTPN11, VAV1, PTK2	0.0136316	5.412
BP	skeletal system development	5	MMP14, VDR, MMP9, TP63, TGFBR1	0.0268143	4.4023
BP	chromatin remodeling	5	KDM5C, MYC, ESR1, TP63, BRD4	0.0274576	4.36969
BP	G2/M transition of mitotic cell cycle	5	CDKN1A, HSP90AA1, CDK2, CDK1, AURKA	0.0307899	4.21363
BP	protein localization	5	NOS2, CD81, EPHX2, DRD2, TP53	0.0315109	4.18375
BP	positive regulation of canonical Wnt signaling pathway	5	YAP1, PSMB5, SRC, XIAP, EGFR	0.0430812	3.78146
BP	negative regulation of interferon-gamma-mediated signaling pathway	4	NR1H2, NR1H3, PPARG, PTPN2	3.18645e-05	58.9909
BP	interleukin-21-mediated signaling pathway	4	STAT1, STAT3, JAK3, JAK1	3.18645e-05	58.9909
BP	interleukin-9-mediated signaling pathway	4	STAT1, STAT3, JAK3, JAK1	4.75008e-05	52.4363
BP	leukotriene biosynthetic process	4	SYK, PLA2G1B, ALOX5, ALOX5AP	9.21541e-05	42.9024
BP	interleukin-2-mediated signaling pathway	4	SYK, JAK3, IL2, JAK1	9.21541e-05	42.9024
BP	interleukin-35-mediated signaling pathway	4	STAT1, STAT3, JAK2, JAK1	9.21541e-05	42.9024
BP	negative regulation of cholesterol storage	4	NR1H2, NR1H3, PPARG, PPARA	9.21541e-05	42.9024
BP	positive regulation of receptor activity	4	IFNG, JAK2, HIF1A, HDAC6	0.000122112	39.3272
BP	angiotensin maturation	4	ACE2, ACE, MME, CMA1	0.000122112	39.3272
BP	regulation of cell adhesion mediated by integrin	4	PLAU, PTPN11, PTK2, PIK3CG	0.000157765	36.3021
BP	beta-amyloid clearance	4	C3, MME, C5AR1, IGF1R	0.000199551	33.7091
BP	cellular response to angiotensin	4	MYC, PRKCD, PTPN11, IGF1R	0.000199551	33.7091
BP	interleukin-27-mediated signaling pathway	4	STAT1, STAT3, JAK2, JAK1	0.000247898	31.4618
BP	positive regulation of cellular protein metabolic process	4	NFKBIA, NR1H2, AGTR1, NR1H3	0.000247898	31.4618
BP	cellular response to fluid shear stress	4	CA2, SRC, MMP2, PTGS2	0.000247898	31.4618
BP	positive regulation of phosphoprotein phosphatase activity	4	PDGFRB, AGTR2, JAK2, MTOR	0.000303221	29.4954
BP	replicative senescence	4	CDKN1A, TERT, MME, TP53	0.000303221	29.4954
BP	low-density lipoprotein particle remodeling	4	PLA2G2A, AGTR1, MPO, PLA2G7	0.000365924	27.7604
BP	dendritic cell chemotaxis	4	CCR1, CXCR4, CCR5, PIK3CG	0.000365924	27.7604
BP	uterus development	4	RBP4, SRC, ESR1, CYP19A1	0.000365924	27.7604
BP	retinoic acid receptor signaling pathway	4	RXRA, NR1H2, RARB, PPARG	0.000436399	26.2182
BP	positive regulation of SMAD protein import into nucleus	4	PARP1, PPARG, JAK2, TGFBR1	0.000515028	24.8383
BP	platelet formation	4	CASP3, EP300, PTPN6, PTPN11	0.000515028	24.8383
BP	response to corticosterone	4	CDKN1A, MAOB, CCND1, FOS	0.00060218	23.5963
BP	response to X-ray	4	CDKN1A, CCND1, CASP3, TP53	0.00060218	23.5963
BP	positive regulation of bone resorption	4	SYK, CA2, PRKCA, EGFR	0.00060218	23.5963
BP	temperature homeostasis	4	STAT3, DRD1, HTR2A, DRD2	0.000698214	22.4727
BP	neurotrophin TRK receptor signaling pathway	4	NTRK1, SRC, CASP3, PTPN11	0.000698214	22.4727
BP	peptide hormone processing	4	DPP4, BCHE, ECE1, PLA2G7	0.000803478	21.4512
BP	macrophage differentiation	4	CASP8, IFNG, PARP1, MMP9	0.000803478	21.4512
BP	positive regulation of smooth muscle cell migration	4	PDGFRB, SRC, MYC, BCL2	0.000918309	20.5186
BP	positive regulation of osteoclast differentiation	4	CCR1, IFNG, CA2, FOS	0.000918309	20.5186
BP	negative regulation of reactive oxygen species metabolic process	4	G6PD, BCL2, HIF1A, TP53	0.000918309	20.5186
BP	regulation of multicellular organism growth	4	APP, PIK3CA, CDK4, STAT3	0.00117798	18.8771
BP	maternal process involved in female pregnancy	4	ACE2, MMP7, AKR1B1, MTOR	0.00117798	18.8771
BP	positive regulation of protein insertion into mitochondrial membrane involved in apoptotic signaling pathway	4	CASP8, BCL2, TP53, TP63	0.00132343	18.151
BP	positive regulation of immunoglobulin production	4	CD86, RBP4, TLR9, IL2	0.00132343	18.151
BP	negative regulation of blood pressure	4	NOS2, BDKRB1, DRD2, PPARA	0.00147971	17.4788
BP	endodermal cell differentiation	4	MMP14, MMP2, COL7A1, MMP9	0.00164709	16.8545
BP	beta-catenin-TCF complex assembly	4	CREBBP, TERT, MYC, EP300	0.00182585	16.2733
BP	positive regulation of synaptic transmission, glutamatergic	4	NTRK1, DRD1, PTGS2, EGFR	0.00182585	16.2733
BP	regulation of ERK1 and ERK2 cascade	4	SYK, ERBB2, PTPN6, EGFR	0.00182585	16.2733
BP	phosphatidylcholine acyl-chain remodeling	4	PLA2G1B, NR1H2, PLA2G2A, NR1H3	0.00201626	15.7309
BP	TRIF-dependent toll-like receptor signaling pathway	4	CD40, CASP8, CD14, BIRC2	0.00201626	15.7309
BP	positive regulation of release of sequestered calcium ion into cytosol	4	BAX, BDKRB1, DRD1, F2	0.00201626	15.7309
BP	positive regulation of vascular endothelial growth factor production	4	C3, C5AR1, PTGS2, HIF1A	0.00201626	15.7309
BP	intrinsic apoptotic signaling pathway in response to DNA damage by p53 class mediator	4	CDKN1A, EP300, TP53, TP63	0.00201626	15.7309
BP	negative regulation of fibroblast proliferation	4	MYC, BAX, AGTR2, TP53	0.00221859	15.2234
BP	response to electrical stimulus	4	NTRK1, SRC, MMP2, CD14	0.00221859	15.2234
BP	platelet-derived growth factor receptor signaling pathway	4	PDGFRB, PTEN, PTPN11, JAK2	0.00243308	14.7477
BP	positive regulation of phosphatidylinositol 3-kinase activity	4	PDGFRB, FLT1, SRC, PTK2	0.00243308	14.7477
BP	response to morphine	4	MDM2, CXCR4, DRD2, MTOR	0.00243308	14.7477
BP	positive regulation of DNA binding	4	MYC, PPARG, JAK2, MMP9	0.00265997	14.3008
BP	positive regulation of cyclin-dependent protein serine/threonine kinase activity	4	ADAM17, CCND1, SRC, EGFR	0.00265997	14.3008
BP	positive regulation of erythrocyte differentiation	4	STAT1, STAT3, MAPK14, HIF1A	0.00265997	14.3008
BP	positive regulation of cytosolic calcium ion concentration involved in phospholipase C-activating G-protein coupled signaling pathway	4	AGTR1, F2RL1, DRD1, DRD2	0.0028995	13.8802
BP	activation of phospholipase C activity	4	CD86, C5AR1, HTR2A, EGFR	0.0028995	13.8802
BP	B cell activation	4	IL4, CD86, CD40, CASP8	0.00315189	13.4836
BP	B cell proliferation	4	CD40, IFNB1, PRKCD, BCL2	0.00315189	13.4836
BP	response to axon injury	4	NTRK1, CDK1, BAX, DRD2	0.00315189	13.4836
BP	negative regulation of extrinsic apoptotic signaling pathway in absence of ligand	4	TERT, BCL2, BCL2L1, MCL1	0.00341736	13.1091
BP	blood vessel remodeling	4	ACE, MDM2, BAX, AGTR2	0.00341736	13.1091
BP	negative regulation of extrinsic apoptotic signaling pathway	4	YAP1, IL4, SRC, TGFBR1	0.00369612	12.7548
BP	lipopolysaccharide-mediated signaling pathway	4	NFKBIA, CD14, MAPK14, MAPK3	0.00369612	12.7548
BP	ERK1 and ERK2 cascade	4	MYC, CDK1, KDR, MAPK3	0.00398836	12.4191
BP	activation of MAPKK activity	4	NTRK1, JAK2, TGFBR1, MAPK3	0.00429429	12.1007
BP	energy homeostasis	4	ALK, PIK3CA, STAT3, PRCP	0.00461408	11.7982
BP	positive regulation of intrinsic apoptotic signaling pathway	4	BCL2, BAX, TP53, BCL2L1	0.00494791	11.5104
BP	response to cold	4	HSP90AA1, CASP8, PPARG, FOS	0.00494791	11.5104
BP	protein kinase B signaling	4	CD40, PIK3CA, PTEN, KDR	0.00494791	11.5104
BP	cellular response to estradiol stimulus	4	MMP2, ESR1, EGFR, IGF1R	0.00529595	11.2364
BP	extrinsic apoptotic signaling pathway	4	CASP8, IFNG, BAX, JAK2	0.00565837	10.975
BP	negative regulation of vascular smooth muscle cell proliferation	4	CDKN1A, PTEN, PPARG, RHOA	0.00565837	10.975
BP	negative regulation of MAP kinase activity	4	PRKCD, PTPN6, PPARG, HMGCR	0.00642693	10.4873
BP	cellular response to epidermal growth factor stimulus	4	MYC, ERBB2, PTPN11, EGFR	0.00725476	10.041
BP	response to cAMP	4	JUN, STAT1, FOS, BIRC2	0.00725476	10.041
BP	interleukin-12-mediated signaling pathway	4	IFNG, JAK2, PPIA, JAK1	0.00725476	10.041
BP	positive regulation of G1/S transition of mitotic cell cycle	4	ADAM17, CCND1, TERT, EGFR	0.00814291	9.63116
BP	erythrocyte differentiation	4	CASP3, JAK2, JAK3, PTPN2	0.0086099	9.43854
BP	T cell activation	4	DPP4, IL4, CASP8, PIK3CG	0.00909232	9.25347
BP	negative regulation of I-kappaB kinase/NF-kappaB signaling	4	CASP8, STAT1, ESR1, RHOA	0.0101038	8.90428
BP	response to retinoic acid	4	PDGFRB, RBP4, RXRA, MMP2	0.0101038	8.90428
BP	cellular response to amino acid stimulus	4	MMP2, EGFR, MTOR, BCL2L1	0.0111782	8.58049
BP	positive regulation of type I interferon production	4	CREBBP, SYK, EP300, CD14	0.0111782	8.58049
BP	cellular response to xenobiotic stimulus	4	NOS2, MYC, CXCR4, TP53	0.0141432	7.86545
BP	humoral immune response	4	IFNG, IFNB1, ALOX5, BCL2	0.0141432	7.86545
BP	learning	4	BCHE, APP, JUN, PTGS2	0.0147845	7.73651
BP	negative regulation of G1/S transition of mitotic cell cycle	4	CDKN1A, CDK4, PTEN, BCL2	0.0154421	7.61172
BP	cartilage development	4	TIMP1, TYMS, HIF1A, MAPK3	0.0154421	7.61172
BP	glucose metabolic process	4	G6PD, PIK3CA, MYC, MAPK14	0.016116	7.4909
BP	positive regulation of cytokine production	4	IFNG, SRC, AGTR2, PIK3CG	0.0182356	7.15041
BP	phagocytosis	4	PIK3CA, CD14, MET, ELANE	0.0182356	7.15041
BP	response to wounding	4	CCR1, MYC, F2, AURKA	0.0197307	6.9401
BP	regulation of transcription from RNA polymerase II promoter in response to hypoxia	4	CREBBP, PSMB5, EP300, HIF1A	0.0229182	6.55454
BP	positive regulation of protein binding	4	APP, ACE, TERT, EP300	0.0246107	6.37739
BP	hematopoietic progenitor cell differentiation	4	FLT1, KDR, PTPN6, TP53	0.0246107	6.37739
BP	response to insulin	4	FABP3, MAPK14, PPARA, MTOR	0.0272727	6.12892
BP	defense response	4	STAT1, STAT3, NOD1, MPO	0.0291295	5.97376
BP	regulation of actin cytoskeleton organization	4	PDGFRB, PRKCD, RHOA, MTOR	0.0300824	5.89909
BP	cellular response to glucose stimulus	4	ACE, PIK3CA, CMA1, IGF1R	0.0310516	5.82626
BP	cholesterol metabolic process	4	IL4, APP, RXRA, CYP11B2	0.0310516	5.82626
BP	cell morphogenesis	4	YAP1, VDR, MAPK14, EGFR	0.0361411	5.48752
BP	anaphase-promoting complex-dependent catabolic process	4	PSMB5, CDK2, CDK1, AURKA	0.0382898	5.3628
BP	cellular response to interleukin-1	4	CD40, MYC, MMP2, HIF1A	0.0382898	5.3628
BP	fatty acid metabolic process	4	C3, FABP3, PPARG, PPARA	0.0416324	5.18601
BP	female pregnancy	4	ACE, BCL2, FOS, CRHR1	0.04631	4.96765
BP	interleukin-1-mediated signaling pathway	4	NFKBIA, PSMB5, NOD1, MAPK3	0.0487423	4.86523
BP	intestinal epithelial cell maturation	3	CDKN1A, TYMS, HIF1A	0.000418532	88.4863
BP	entry into host	3	CXCR4, CCR5, PPIA	0.000418532	88.4863
BP	activation of cysteine-type endopeptidase activity involved in apoptotic signaling pathway	3	CASP8, BAX, JAK2	0.000418532	88.4863
BP	regulation of systemic arterial blood pressure by renin-angiotensin	3	ACE2, ACE, AGTR1	0.00103477	58.9909
BP	cellular response to aldosterone	3	ACE, SGK1, IGF1R	0.00103477	58.9909
BP	positive regulation of killing of cells of other organism	3	IFNG, SYK, NOS2	0.00103477	58.9909
BP	enzyme linked receptor protein signaling pathway	3	ERBB2, JAK2, JAK3	0.00144066	50.5636
BP	negative regulation of response to endoplasmic reticulum stress	3	NR1H2, ALOX5, NR1H3	0.00144066	50.5636
BP	macrophage derived foam cell differentiation	3	STAT1, EP300, PPARG	0.00144066	50.5636
BP	regulation of toll-like receptor signaling pathway	3	APP, ESR1, BIRC2	0.00144066	50.5636
BP	positive regulation of transporter activity	3	RXRA, NR1H3, SGK1	0.00191026	44.2431
BP	fusion of virus membrane with host plasma membrane	3	CXCR4, CCR5, PPIA	0.00191026	44.2431
BP	progesterone receptor signaling pathway	3	YAP1, SRC, PGR	0.00244248	39.3272
BP	positive regulation of isotype switching to IgG isotypes	3	IL4, CD40, IL2	0.00303624	35.3945
BP	vagina development	3	RBP4, BAX, ESR1	0.00303624	35.3945
BP	response to salt stress	3	BDKRB2, BAX, TP53	0.00303624	35.3945
BP	negative regulation of lipid storage	3	NFKBIA, PPARG, PTPN2	0.00303624	35.3945
BP	negative regulation of cell size	3	PTEN, RHOA, MTOR	0.00303624	35.3945
BP	cyclooxygenase pathway	3	TBXAS1, PTGS2, PTGS1	0.00369049	32.1768
BP	angiotensin-activated signaling pathway	3	CA2, AGTR1, AGTR2	0.00369049	32.1768
BP	negative regulation of beta-amyloid clearance	3	IFNG, IFNGR1, HMGCR	0.00369049	32.1768
BP	regulation of cytokine production involved in inflammatory response	3	NOS2, ALOX5, MAPK14	0.00369049	32.1768
BP	neutrophil mediated immunity	3	ADAM17, ACE, PLA2G1B	0.00369049	32.1768
BP	intracellular steroid hormone receptor signaling pathway	3	PGR, NR3C1, ESR1	0.00369049	32.1768
BP	response to cholesterol	3	HMGCR, CCR5, TGFBR1	0.00369049	32.1768
BP	cellular response to insulin-like growth factor stimulus	3	PTEN, PTPN11, IGF1R	0.00369049	32.1768
BP	negative regulation of production of miRNAs involved in gene silencing by miRNA	3	TERT, ESR1, TP53	0.00369049	32.1768
BP	positive regulation of MHC class II biosynthetic process	3	IL4, IFNG, JAK2	0.00440416	29.4954
BP	prepulse inhibition	3	PTEN, DRD1, DRD2	0.00440416	29.4954
BP	negative regulation of epithelial cell differentiation	3	YAP1, IFNG, CCND1	0.00440416	29.4954
BP	response to magnesium ion	3	CCND1, MDM2, CD14	0.00440416	29.4954
BP	epithelial cell development	3	CXCR4, ESR1, TP63	0.00440416	29.4954
BP	positive regulation of phospholipase C activity	3	PDGFRB, FLT1, ESR1	0.00517623	27.2265
BP	mitotic G1 DNA damage checkpoint	3	CCND1, CDK2, TP53	0.00517623	27.2265
BP	digestive tract morphogenesis	3	BCL2, HIF1A, EGFR	0.00517623	27.2265
BP	interleukin-15-mediated signaling pathway	3	STAT3, JAK3, JAK1	0.00517623	27.2265
BP	negative regulation of telomerase activity	3	SRC, PPARG, TP53	0.00517623	27.2265
BP	growth hormone receptor signaling pathway	3	STAT3, JAK2, PTK2	0.00517623	27.2265
BP	positive regulation of phagocytosis, engulfment	3	C3, F2RL1, PPARG	0.00517623	27.2265
BP	striatum development	3	RARB, DRD1, DRD2	0.00600568	25.2818
BP	JAK-STAT cascade involved in growth hormone signaling pathway	3	STAT3, JAK2, JAK3	0.00600568	25.2818
BP	response to yeast	3	APP, MPO, ELANE	0.00600568	25.2818
BP	positive regulation of ATP biosynthetic process	3	IL4, MYC, PPARA	0.00600568	25.2818
BP	detection of mechanical stimulus involved in sensory perception of pain	3	NTRK1, CXCR4, HTR2A	0.00689149	23.5963
BP	behavioral response to cocaine	3	DRD1, HTR2A, DRD2	0.00689149	23.5963
BP	positive regulation of granulocyte macrophage colony-stimulating factor production	3	SYK, CD80, TLR9	0.00689149	23.5963
BP	positive regulation of G-protein coupled receptor protein signaling pathway	3	C3, APP, DRD2	0.00689149	23.5963
BP	positive regulation of renal sodium excretion	3	EDNRB, AGTR2, DRD2	0.00689149	23.5963
BP	response to beta-amyloid	3	MMP2, MMP3, MMP9	0.00689149	23.5963
BP	positive regulation of myotube differentiation	3	MMP14, MAPK14, MTOR	0.00689149	23.5963
BP	lipoxygenase pathway	3	ALOX5, ALOX5AP, PTGS2	0.00783267	22.1216
BP	intrinsic apoptotic signaling pathway in response to oxidative stress	3	PRKCD, BCL2, JAK2	0.00783267	22.1216
BP	histone phosphorylation	3	CDK2, PRKCD, CDK1	0.00783267	22.1216
BP	vascular endothelial growth factor signaling pathway	3	FLT1, PIK3CA, KDR	0.00783267	22.1216
BP	long-chain fatty acid transport	3	FABP1, FABP3, PPARG	0.00882824	20.8203
BP	megakaryocyte development	3	EP300, PTPN6, PTPN11	0.00882824	20.8203
BP	positive regulation of glial cell proliferation	3	MYC, EGFR, MTOR	0.00987722	19.6636
BP	regulation of protein kinase B signaling	3	NTRK1, PTEN, MTOR	0.00987722	19.6636
BP	positive regulation of transcription of Notch receptor target	3	CREBBP, STAT1, EP300	0.00987722	19.6636
BP	negative regulation of focal adhesion assembly	3	MMP14, SRC, PTEN	0.00987722	19.6636
BP	regulation of necroptotic process	3	HSP90AA1, CASP8, BIRC2	0.00987722	19.6636
BP	regulation of JNK cascade	3	F2RL1, EGFR, IGF1R	0.00987722	19.6636
BP	detection of temperature stimulus involved in sensory perception of pain	3	NTRK1, CXCR4, HTR2A	0.00987722	19.6636
BP	cellular response to estrogen stimulus	3	MYC, MDM2, ESR1	0.00987722	19.6636
BP	positive regulation of macrophage chemotaxis	3	C5AR1, PTK2, MAPK3	0.0109787	18.6287
BP	positive regulation of DNA biosynthetic process	3	PDGFRB, SRC, MYC	0.0109787	18.6287
BP	positive regulation of chemotaxis	3	PDGFRB, F2RL1, CXCR4	0.0109787	18.6287
BP	vasoconstriction	3	ACE, EDNRB, BDKRB2	0.0109787	18.6287
BP	axon regeneration	3	JUN, BCL2, JAK2	0.0109787	18.6287
BP	positive regulation of cardiac muscle cell apoptotic process	3	PTEN, HMGCR, TP53	0.0109787	18.6287
BP	prostaglandin biosynthetic process	3	TBXAS1, PTGS2, PTGS1	0.0109787	18.6287
BP	cellular response to low-density lipoprotein particle stimulus	3	SYK, CD81, PPARG	0.0121316	17.6973
BP	negative regulation of pri-miRNA transcription from RNA polymerase II promoter	3	APP, PPARG, PPARA	0.0133351	16.8545
BP	regulation of innate immune response	3	CASP8, XIAP, BIRC2	0.0133351	16.8545
BP	positive regulation of beta-amyloid formation	3	IFNG, IFNGR1, CASP3	0.0133351	16.8545
BP	negative regulation of chondrocyte differentiation	3	RARB, PTPN11, TGFBR1	0.0133351	16.8545
BP	cellular response to peptide hormone stimulus	3	CYP11B2, SRC, MDM2	0.0133351	16.8545
BP	necroptotic process	3	CD14, TP53, BIRC2	0.0145883	16.0884
BP	positive regulation of cardiac muscle hypertrophy	3	PARP1, PRKCA, PDE5A	0.0145883	16.0884
BP	pyroptosis	3	CASP8, CASP1, ELANE	0.0145883	16.0884
BP	positive regulation of long-term synaptic potentiation	3	APP, MME, DRD2	0.0158902	15.3889
BP	positive regulation of monocyte chemotaxis	3	CCR1, APP, PLA2G7	0.0158902	15.3889
BP	regulation of blood vessel diameter	3	ACE2, ACE, AGTR1	0.0158902	15.3889
BP	negative regulation of cell cycle arrest	3	CCND1, CDK4, MDM2	0.0158902	15.3889
BP	positive regulation of mesenchymal cell proliferation	3	STAT1, MYC, KDR	0.0158902	15.3889
BP	positive regulation of oligodendrocyte differentiation	3	CXCR4, PPARG, MTOR	0.0158902	15.3889
BP	response to fatty acid	3	FABP3, TBXAS1, PTGS2	0.0172399	14.7477
BP	B cell homeostasis	3	CASP3, BCL2, BAX	0.0172399	14.7477
BP	long-chain fatty acid biosynthetic process	3	ALOX5, EPHX2, PTGS2	0.0186366	14.1578
BP	protein tetramerization	3	APP, TP53, TP63	0.0186366	14.1578
BP	execution phase of apoptosis	3	CASP8, CASP3, CASP1	0.0200794	13.6133
BP	cellular response to platelet-derived growth factor stimulus	3	PDGFRB, SRC, MYC	0.0200794	13.6133
BP	natural killer cell activation	3	CASP8, IFNB1, IL2	0.0200794	13.6133
BP	regulation of calcium ion transport	3	BCL2, CXCR4, RHOA	0.0200794	13.6133
BP	purinergic nucleotide receptor signaling pathway	3	C3, APP, CASP1	0.0200794	13.6133
BP	regulation of protein binding	3	APP, SRC, TGFBR1	0.0200794	13.6133
BP	decidualization	3	VDR, PTGS2, MAPK3	0.0215673	13.1091
BP	homeostasis of number of cells within a tissue	3	BCL2, BAX, PTPN11	0.0230997	12.6409
BP	negative regulation of tumor necrosis factor-mediated signaling pathway	3	F2RL1, XIAP, PTPN2	0.0230997	12.6409
BP	positive regulation of release of cytochrome c from mitochondria	3	BAX, TP53, MMP9	0.0230997	12.6409
BP	innate immune response in mucosa	3	IL4, NOS2, PLA2G1B	0.0230997	12.6409
BP	response to radiation	3	NTRK1, JUN, BCL2	0.0246755	12.205
BP	cellular response to hormone stimulus	3	CYP11B2, STAT3, FOS	0.0246755	12.205
BP	T cell homeostasis	3	CASP3, BCL2, JAK3	0.0246755	12.205
BP	regulation of G1/S transition of mitotic cell cycle	3	CDKN1A, CCND1, PTPN6	0.0246755	12.205
BP	negative regulation of peptidyl-serine phosphorylation	3	PTEN, BDKRB2, BAX	0.0246755	12.205
BP	regulation of cell motility	3	ERBB2, RHOA, EGFR	0.026294	11.7982
BP	telomere maintenance via telomerase	3	HSP90AA1, TERT, CDK2	0.026294	11.7982
BP	response to amino acid	3	CASP3, RHOA, MTOR	0.026294	11.7982
BP	interleukin-7-mediated signaling pathway	3	STAT3, JAK3, JAK1	0.026294	11.7982
BP	positive regulation of macroautophagy	3	IL4, KDR, HIF1A	0.0279544	11.4176
BP	negative regulation of DNA binding	3	NFKBIA, JUN, JAK2	0.0279544	11.4176
BP	behavioral fear response	3	DPP4, BCL2, DRD1	0.0279544	11.4176
BP	DNA biosynthetic process	3	POLB, TERT, TYMS	0.0279544	11.4176
BP	regulation of mitochondrial membrane potential	3	BCL2, BAX, BCL2L1	0.0279544	11.4176
BP	intrinsic apoptotic signaling pathway	3	CDKN1A, BAX, TP53	0.0296558	11.0608
BP	face morphogenesis	3	MMP2, EP300, PTPN11	0.0296558	11.0608
BP	positive regulation of DNA replication	3	JUN, CDK1, EGFR	0.0296558	11.0608
BP	positive regulation of cardiac muscle cell proliferation	3	YAP1, CDK1, MAPK14	0.0313975	10.7256
BP	regulation of tumor necrosis factor-mediated signaling pathway	3	CASP8, SYK, BIRC2	0.0313975	10.7256
BP	positive regulation of neurogenesis	3	ACE, IFNG, MME	0.0313975	10.7256
BP	negative regulation of cyclin-dependent protein serine/threonine kinase activity	3	CDKN1A, CASP3, PTEN	0.0313975	10.7256
BP	extrinsic apoptotic signaling pathway via death domain receptors	3	CASP8, BCL2, BAX	0.0313975	10.7256
BP	positive regulation of telomerase activity	3	HSP90AA1, MYC, MAPK3	0.0331786	10.4102
BP	establishment of cell polarity	3	HSP90AA1, PTK2, IGF1R	0.0331786	10.4102
BP	positive regulation of Ras protein signal transduction	3	NTRK1, JAK2, VAV1	0.0331786	10.4102
BP	positive regulation of defense response to virus by host	3	IL4, HSP90AA1, STAT1	0.0331786	10.4102
BP	response to exogenous dsRNA	3	NFKBIA, IFNB1, MAPK3	0.0331786	10.4102
BP	positive regulation of transforming growth factor beta receptor signaling pathway	3	ADAM17, CREBBP, EP300	0.0331786	10.4102
BP	cellular response to vascular endothelial growth factor stimulus	3	FLT1, KDR, MAPK14	0.0331786	10.4102
BP	intrinsic apoptotic signaling pathway in response to endoplasmic reticulum stress	3	BCL2, BAX, TP53	0.0331786	10.4102
BP	spleen development	3	POLB, ADAM17, BCL2	0.0331786	10.4102
BP	regulation of heart rate	3	EDNRB, MDM2, DRD2	0.0349984	10.1127
BP	T cell differentiation in thymus	3	ADAM17, BCL2, TP53	0.0349984	10.1127
BP	negative regulation of smooth muscle cell proliferation	3	ACE2, IFNG, PPARG	0.0349984	10.1127
BP	activation of protein kinase B activity	3	SRC, PPIA, MTOR	0.0368561	9.83181
BP	T cell differentiation	3	VAV1, IL2, PTPN2	0.0368561	9.83181
BP	negative regulation of endothelial cell apoptotic process	3	IL4, TERT, KDR	0.0368561	9.83181
BP	long-term memory	3	DRD2, SGK1, MTOR	0.038751	9.56608
BP	positive regulation of JAK-STAT cascade	3	AKR1B1, F2, JAK2	0.038751	9.56608
BP	negative regulation of protein catabolic process	3	NOS2, HMGCR, EGFR	0.0406822	9.31435
BP	response to cocaine	3	MDM2, DRD2, MTOR	0.0406822	9.31435
BP	negative regulation of protein complex assembly	3	SRC, EP300, HDAC6	0.0426492	9.07552
BP	negative regulation of endothelial cell proliferation	3	STAT1, ALOX5, TGFBR1	0.0426492	9.07552
BP	positive regulation of glucose import	3	TERT, PTPN11, MAPK14	0.0426492	9.07552
BP	lung alveolus development	3	ACE, KDR, PGR	0.0426492	9.07552
BP	germ cell development	3	BAX, MTOR, BCL2L1	0.0426492	9.07552
BP	response to interleukin-1	3	APP, SRC, PRKCA	0.044651	8.84863
BP	positive regulation of cytokinesis	3	DRD2, RHOA, IGF1R	0.044651	8.84863
BP	cellular response to ionizing radiation	3	CDKN1A, MAPK14, TP53	0.044651	8.84863
BP	positive regulation of cell cycle	3	CCND1, CDK4, MYC	0.0466871	8.63281
BP	cellular response to nerve growth factor stimulus	3	NTRK1, APP, PTEN	0.0466871	8.63281
BP	embryo implantation	3	MMP2, PTGS2, MMP9	0.0466871	8.63281
BP	negative regulation of Notch signaling pathway	3	NFKBIA, MMP14, EGFR	0.0466871	8.63281
BP	positive regulation of interferon-beta production	3	HSP90AA1, TLR9, PTPN11	0.0487566	8.42726
BP	negative regulation of hydrogen peroxide metabolic process	2	MMP3, HDAC6	0.0167779	117.982
BP	abortive mitotic cell cycle	2	PTPN6, PTPN11	0.0167779	117.982
BP	regulation of nitrogen utilization	2	BCL2, BAX	0.0167779	117.982
BP	leukotriene production involved in inflammatory response	2	ALOX5, ALOX5AP	0.0167779	117.982
BP	negative regulation of cholangiocyte apoptotic process	2	MTOR, IGF1R	0.0167779	117.982
BP	conditioned taste aversion	2	FOS, DRD1	0.0250616	78.6545
BP	response to UV-A	2	CCND1, EGFR	0.0250616	78.6545
BP	respiratory burst involved in defense response	2	MPO, PIK3CG	0.0250616	78.6545
BP	female genitalia morphogenesis	2	RBP4, TP63	0.0250616	78.6545
BP	positive regulation of apoptotic process involved in mammary gland involution	2	VDR, BAX	0.0250616	78.6545
BP	regulation of viral genome replication	2	BCL2, PPIA	0.0250616	78.6545
BP	positive regulation of cyclase activity	2	MAPK14, MAPK3	0.0250616	78.6545
BP	cellular response to lectin	2	SYK, MYC	0.0250616	78.6545
BP	N-terminal peptidyl-lysine acetylation	2	CREBBP, EP300	0.0250616	78.6545
BP	hormone catabolic process	2	ACE, ECE1	0.0250616	78.6545
BP	beta selection	2	SYK, RHOA	0.0250616	78.6545
BP	negative regulation of chronic inflammatory response	2	IL4, CYP19A1	0.033276	58.9909
BP	negative regulation of lipid transport	2	NR1H2, NR1H3	0.033276	58.9909
BP	leukocyte activation involved in immune response	2	SYK, IL2	0.033276	58.9909
BP	cellular response to hydrostatic pressure	2	PIK3CA, MYC	0.033276	58.9909
BP	re-entry into mitotic cell cycle	2	CCND1, MYC	0.033276	58.9909
BP	mammary gland branching involved in pregnancy	2	VDR, ESR1	0.033276	58.9909
BP	neutrophil mediated killing of gram-negative bacterium	2	F2, ELANE	0.033276	58.9909
BP	stress-induced premature senescence	2	CDKN1A, MAPK14	0.033276	58.9909
BP	negative regulation of chemotaxis	2	ELANE, PTPN2	0.033276	58.9909
BP	negative regulation of pinocytosis	2	NR1H2, NR1H3	0.033276	58.9909
BP	cellular response to actinomycin D	2	MDM2, TP53	0.033276	58.9909
BP	response to cobalamin	2	CD40, EGFR	0.033276	58.9909
BP	post-embryonic camera-type eye morphogenesis	2	KDR, BAX	0.033276	58.9909
BP	angiogenesis involved in coronary vascular morphogenesis	2	ACE, TGFBR1	0.033276	58.9909
BP	renin-angiotensin regulation of aldosterone production	2	AGTR1, AGTR2	0.033276	58.9909
BP	regulation of nucleotide-binding oligomerization domain containing signaling pathway	2	XIAP, BIRC2	0.0414215	47.1927
BP	positive regulation of neuron maturation	2	BCL2, MTOR	0.0414215	47.1927
BP	positive regulation of fatty acid metabolic process	2	PPARG, PPARA	0.0414215	47.1927
BP	negative regulation of cardiac muscle contraction	2	PDE5A, PIK3CG	0.0414215	47.1927
BP	negative regulation of hepatocyte apoptotic process	2	PPARA, IGF1R	0.0414215	47.1927
BP	connective tissue replacement involved in inflammatory response wound healing	2	TIMP1, HIF1A	0.0414215	47.1927
BP	negative regulation of cellular response to transforming growth factor beta stimulus	2	IL4, PPARG	0.0414215	47.1927
BP	positive regulation of cell activation	2	APP, JAK2	0.0414215	47.1927
BP	regulation of dopamine uptake involved in synaptic transmission	2	DRD1, DRD2	0.0414215	47.1927
BP	lipoxin biosynthetic process	2	ALOX5, ALOX5AP	0.0414215	47.1927
BP	positive regulation of vitamin D receptor signaling pathway	2	RXRA, VDR	0.0414215	47.1927
BP	B cell lineage commitment	2	BCL2, TP53	0.0414215	47.1927
BP	response to cobalt ion	2	CASP8, CASP3	0.0494989	39.3272
BP	lipid oxidation	2	ALOX5, PLA2G7	0.0494989	39.3272
BP	negative regulation of sequestering of triglyceride	2	PPARG, PPARA	0.0494989	39.3272
BP	negative regulation of ERBB signaling pathway	2	ERBB2, EGFR	0.0494989	39.3272
BP	regulation of epithelial cell migration	2	SRC, PTK2	0.0494989	39.3272
BP	mitotic centrosome separation	2	KIF11, AURKA	0.0494989	39.3272
BP	positive regulation of fatty acid oxidation	2	PPARG, PPARA	0.0494989	39.3272
BP	mitochondrial DNA repair	2	PARP1, TP53	0.0494989	39.3272
BP	activation of Janus kinase activity	2	IL4, JAK2	0.0494989	39.3272
BP	neuron-neuron synaptic transmission	2	PTEN, DRD2	0.0494989	39.3272
BP	regulation of systemic arterial blood pressure by endothelin	2	ECE1, RHOA	0.0494989	39.3272
BP	cellular response to progesterone stimulus	2	SRC, IGF1R	0.0494989	39.3272
BP	epithelial cell maturation	2	AKR1B1, PGR	0.0494989	39.3272
BP	bradykinin catabolic process	2	ACE, ECE1	0.0494989	39.3272
BP	regulation of platelet aggregation	2	SYK, PRKCA	0.0494989	39.3272
BP	mating behavior	2	APP, DRD1	0.0494989	39.3272
BP	receptor-mediated virion attachment to host cell	2	ACE2, CD81	0.0494989	39.3272
BP	positive regulation of transcription from RNA polymerase II promoter in response to hypoxia	2	HIF1A, TP53	0.0494989	39.3272
BP	cerebral cortex GABAergic interneuron migration	2	DRD1, DRD2	0.0494989	39.3272
BP	regulation of smooth muscle cell migration	2	ACE, PLAU	0.0494989	39.3272
BP	positive regulation of cholesterol transport	2	NR1H2, NR1H3	0.0494989	39.3272
MF	protein binding	145	CD86, APP, CD81, CD80, PREP, NR3C1, MPO, IGF1R, EDNRB, CCND1, PLAU, MYC, KDR, EP300, TP63, PDGFRB, G6PD, PRKCD, PRKCA, ACE2, RBP4, ADAM17, AGTR1, PGR, AGTR2, PPIA, TP53, CD274, SLC22A6, MAOB, SLC5A1, HIF1A, CRHR1, DPP4, C3, TERT, DRD1, CD14, DRD2, ELANE, MCL1, CCR1, CREBBP, JUN, VDR, ESR1, PTK2, IL2, NFKBIA, IL4, CDK4, ALB, CDK2, BCL2, MDM2, CDK1, SHBG, BCL2L1, ALK, CDKN1A, KDM5C, CD40, FLT1, PTE…	3.7818e-10	1.31769
MF	identical protein binding	49	ALK, APP, PTEN, HTR2A, PIK3CG, IGF1R, CASP8, CASP1, KDR, JAK2, CCR5, TP63, G6PD, HSP90AA1, PARP1, FOS, MMP9, ACE2, PPARG, PGR, MET, TP53, BIRC2, SLC22A6, MAOB, XIAP, NOD1, HMGCR, EGFR, DPP4, RXRA, TERT, ERBB2, DRD2, MAPK3, NTRK1, BCHE, JUN, STAT1, STAT3, ESR1, MTOR, NFKBIA, ALB, ALOX5AP, BCL2, MDM2, BAX, BCL2L1	1.109e-13	3.2712
MF	zinc ion binding	33	KDM5C, ECE1, NR3C1, HDAC6, ADAMTS5, RXRA, CA2, EP300, TIMP1, CREBBP, MMP7, ACE, PARP1, MME, MMP1, VDR, NR1H2, MMP2, MMP3, NR1H3, PRKCA, MMP9, ESR1, ACE2, MMP14, ALB, MDM2, RARB, PPARG, PGR, PPARA, TP53, BIRC2	3.1692e-12	4.34491
MF	metal ion binding	32	CDKN1A, PRSS1, KDM5C, XIAP, ECE1, PTGS2, MPO, PTGS1, POLB, TERT, EP300, TIMP1, JAK2, PDE8B, TP63, JAK1, CREBBP, ACE, MME, NOS2, PRKCD, ESR1, TGFBR1, VAV1, ADAM17, ALB, CDK2, MDM2, PDE5A, PPARG, TP53, BIRC2	0.0498234	1.3815
MF	ATP binding	31	ALK, FLT1, SRC, NOD1, KIF11, EGFR, PIK3CG, AURKA, IGF1R, ERBB2, KDR, JAK2, JAK3, JAK1, MAPK3, PDGFRB, NTRK1, HSP90AA1, SYK, PRKCD, PRKCA, MAPK14, TGFBR1, MTOR, PTK2, PIK3CA, CDK4, CDK2, CDK1, SGK1, MET	2.49979e-05	2.28993
MF	enzyme binding	29	APP, CD40, SRC, PTEN, CYP2C19, PTGS2, HIF1A, HDAC6, EGFR, POLB, RXRA, CCND1, BRD4, PDGFRB, BCHE, JUN, GSTM1, PARP1, STAT1, PRKCD, PRKCA, MAPK14, ESR1, NFKBIA, ALOX5AP, MDM2, PPARG, PGR, TP53	3.53189e-18	8.63605
MF	protein serine/threonine/tyrosine kinase activity	25	ALK, FLT1, SRC, EGFR, PIK3CG, AURKA, IGF1R, ERBB2, KDR, JAK2, JAK3, JAK1, PDGFRB, NTRK1, SYK, PRKCD, PRKCA, MTOR, PTK2, PIK3CA, CDK4, CDK2, CDK1, SGK1, MET	4.77207e-13	6.61381
MF	protein kinase binding	23	PDGFRB, CDKN1A, SYK, PARP1, PRKCD, STAT3, PTEN, PTPN11, KIF11, NR3C1, HIF1A, ESR1, RHOA, EGFR, MTOR, PTK2, AURKA, CCND1, PTPN6, JAK2, TP53, PTPN2, BCL2L1	4.39714e-10	5.25386
MF	DNA binding	23	APP, JUN, KDM5C, PARP1, STAT1, VDR, NR1H2, STAT3, NR1H3, FOS, NR3C1, ESR1, POLB, TERT, MYC, ALB, EP300, RARB, PGR, PPARG, PPARA, TP53, TP63	0.00156463	2.06505
MF	protein homodimerization activity	21	NTRK1, APP, G6PD, HSP90AA1, GSTM1, NOS2, MME, STAT1, EPHX2, STAT3, ECE1, NOD1, TYMS, PTGS2, DPP4, TERT, BCL2, TLR9, BAX, MCL1, BCL2L1	3.62925e-06	3.38852
MF	RNA polymerase II core promoter proximal region sequence-specific DNA binding	21	YAP1, APP, JUN, STAT1, VDR, NR1H2, STAT3, NR1H3, FOS, NR3C1, HIF1A, ESR1, HDAC6, RXRA, MYC, RARB, PGR, PPARG, PPARA, TP53, TP63	0.00428413	1.9825
MF	protein kinase activity	19	NTRK1, SYK, SRC, PRKCD, PRKCA, MAPK14, EGFR, TGFBR1, MTOR, PIK3CG, PTK2, AURKA, CCND1, CDK4, ERBB2, CDK2, CDK1, JAK2, MET	5.47834e-09	5.74839
MF	endopeptidase activity	17	ACE, MMP7, MME, MMP1, CMA1, MMP2, MMP3, PREP, ECE1, MMP9, ACE2, ADAMTS5, MMP14, ADAM17, PSMB5, CASP1, ELANE	3.02364e-17	22.487
MF	macromolecular complex binding	17	CDKN1A, JUN, NOD1, FOS, HTR2A, MTOR, RBP4, CASP8, CCND1, CDK4, MYC, CASP3, ALOX5AP, RARB, DRD2, PPARA, BIRC2	5.86892e-07	4.75154
MF	transmembrane receptor protein tyrosine kinase activity	16	PDGFRB, ALK, NTRK1, FLT1, SYK, SRC, PRKCD, EGFR, PTK2, IGF1R, ERBB2, KDR, JAK2, JAK3, MET, JAK1	8.86689e-14	15.6907
MF	ubiquitin protein ligase binding	16	CDKN1A, JUN, HSP90AA1, CD40, SRC, CXCR4, HIF1A, EGFR, HDAC6, AURKA, NFKBIA, CASP8, MDM2, BCL2, TP53, JAK1	7.09897e-08	6.007
MF	transcription factor binding	16	CREBBP, JUN, PARP1, STAT3, FOS, HIF1A, ESR1, NFKBIA, CCND1, MYC, BCL2, EP300, PPARG, AGTR2, PPARA, TP53	1.12995e-07	5.79656
MF	transcription factor activity, sequence-specific DNA binding	16	JUN, STAT1, VDR, NR1H2, STAT3, FOS, NR3C1, HIF1A, ESR1, RXRA, MYC, PGR, PPARG, PPARA, TP53, TP63	0.00010994	3.2795
MF	protein tyrosine kinase activity	15	PDGFRB, ALK, NTRK1, FLT1, SYK, SRC, EGFR, PTK2, IGF1R, ERBB2, KDR, JAK2, JAK3, MET, JAK1	6.74908e-13	15.6547
MF	chromatin binding	15	YAP1, APP, CREBBP, JUN, FOS, MPO, ESR1, EGFR, FABP1, CDK1, EP300, PPARG, TP53, TP63, BRD4	5.37355e-05	3.70949
MF	serine-type endopeptidase activity	14	PRSS1, MMP7, F10, MMP1, CMA1, MMP2, MMP3, PREP, F2, MMP9, DPP4, MMP14, PLAU, ELANE	1.33358e-08	8.33825
MF	protein serine/threonine kinase activity	14	SYK, PRKCD, PRKCA, MAPK14, TGFBR1, MTOR, PIK3CG, AURKA, PIK3CA, CDK4, CDK2, CDK1, SGK1, MAPK3	4.19289e-05	4.06277
MF	integrin binding	13	APP, SYK, CD81, SRC, PRKCA, EGFR, PTK2, ADAMTS5, MMP14, ADAM17, KDR, PPIA, PTPN2	1.78711e-08	9.18539
MF	sequence-specific DNA binding	13	STAT1, VDR, NR1H2, NR1H3, NR3C1, HIF1A, ESR1, RXRA, BCL2, RARB, PGR, PPARG, PPARA	3.33798e-05	4.49498
MF	receptor binding	13	PDGFRB, APP, SYK, PLA2G1B, SRC, STAT3, F2, PTK2, DPP4, C3, F2RL1, PGR, JAK2	0.000217046	3.6879
MF	transcriptional activator activity, RNA polymerase II transcription regulatory region sequence-specific binding	13	JUN, NR1H2, STAT3, NR1H3, FOS, NR3C1, HIF1A, ESR1, MYC, PGR, PPARA, TP53, TP63	0.000908739	3.13981
MF	kinase activity	12	ALK, CDKN1A, PIK3CA, PLAU, CDK4, ERBB2, PRKCA, JAK2, SGK1, EGFR, MTOR, PIK3CG	4.54168e-06	6.09416
MF	RNA polymerase II transcription factor activity, ligand-activated sequence-specific DNA binding	11	RXRA, VDR, NR1H2, STAT3, RARB, NR1H3, PGR, PPARG, PPARA, NR3C1, ESR1	3.38193e-11	23.1728
MF	protein heterodimerization activity	11	APP, ERBB2, BDKRB2, BCL2, AGTR1, BAX, HIF1A, TP53, BCL2L1, AURKA, MCL1	0.00157146	3.38198
MF	virus receptor activity	10	DPP4, CD86, ACE2, CD81, CD80, CDK1, CXCR4, HTR2A, CCR5, EGFR	2.05581e-08	14.9681
MF	protein phosphatase binding	10	ERBB2, STAT3, PPARG, MAPK14, TP53, JAK3, MET, PTK2, EGFR, JAK1	1.11282e-07	12.365
MF	peptidase activity	10	ADAMTS5, APP, ADAM17, CASP8, PSMB5, MMP1, CASP3, MMP3, MMP9, ELANE	2.96208e-07	11.0444
MF	metalloendopeptidase activity	10	ADAMTS5, MMP14, ADAM17, MMP7, MME, MMP1, MMP2, MMP3, ECE1, MMP9	9.43825e-07	9.64047
MF	heme binding	10	NOS2, CYP11B2, SRC, TBXAS1, CYP2C19, JAK2, PTGS2, MPO, CYP19A1, PTGS1	7.28643e-06	7.53361
MF	metallopeptidase activity	9	ADAMTS5, ACE2, ADAM17, ACE, MMP7, MME, MMP2, MMP3, MMP9	2.37552e-07	14.0249
MF	RNA polymerase II sequence-specific DNA binding transcription factor binding	9	CREBBP, JUN, PARP1, STAT3, EP300, FOS, PPARA, HIF1A, TP53	0.000142204	5.91802
MF	transcription regulatory region sequence-specific DNA binding	9	YAP1, JUN, RXRA, STAT3, NR1H3, PPARG, FOS, TP53, TP63	0.00112675	4.33821
MF	protein domain specific binding	9	CD40, CDK2, MDM2, PTPN11, PPARA, HIF1A, TP63, RHOA, MTOR	0.00228268	3.8781
MF	transcription coactivator binding	8	CREBBP, TERT, STAT1, EP300, PGR, PPARA, HIF1A, ESR1	5.98738e-08	22.1966
MF	non-membrane spanning protein tyrosine kinase activity	7	SYK, SRC, PRKCD, JAK2, JAK3, PTK2, JAK1	2.84757e-06	17.3109
MF	p53 binding	7	CREBBP, MDM2, EP300, HIF1A, TP53, TP63, BRD4	3.63657e-05	11.2155
MF	protease binding	7	DPP4, CASP3, BDKRB2, BCL2, TIMP1, TP53, ELANE	0.000372608	7.37318
MF	protein C-terminus binding	7	YAP1, TERT, SRC, ERBB2, EP300, PPARG, JAK2	0.00978625	3.84687
MF	transcription cofactor binding	6	RXRA, MYC, EP300, PPARG, FOS, ESR1	1.45066e-05	18.9596
MF	chaperone binding	6	APP, TERT, ALB, BAX, TP53, BIRC2	0.00280465	6.20496
MF	protein N-terminus binding	6	TERT, PARP1, ALOX5AP, MDM2, TP53, BIRC2	0.00339682	5.93518
MF	histone deacetylase binding	6	HSP90AA1, CCND1, PARP1, HIF1A, TP53, HDAC6	0.00570914	5.25035
MF	heparin binding	6	ADAMTS5, APP, MMP7, F2, MPO, ELANE	0.01757	3.96829
MF	insulin receptor substrate binding	5	PIK3CA, PRKCD, PTPN11, JAK2, IGF1R	2.6333e-06	47.399
MF	growth factor binding	5	PDGFRB, FLT1, ERBB2, KDR, TGFBR1	0.00023815	16.2511
MF	SH2 domain binding	5	SYK, SRC, PTPN6, JAK2, PTK2	0.000442229	13.8729
MF	phosphotyrosine binding	5	SYK, PTPN6, PTPN11, VAV1, MAPK3	0.000580869	12.927
MF	peptide binding	5	RXRA, MME, CMA1, BDKRB1, PPARG	0.00265797	8.618
MF	scaffold protein binding	5	HSP90AA1, CASP8, SYK, SRC, MAPK3	0.00346474	8.0111
MF	ATPase binding	5	SRC, NR1H2, PGR, ESR1, EGFR	0.00771611	6.39088
MF	kinase binding	5	NTRK1, SRC, PRKCD, CASP1, EGFR	0.0119091	5.63156
MF	protein tyrosine phosphatase activity	5	PTEN, PTPN6, PTPN11, ACP1, PTPN2	0.014015	5.36592
MF	iron ion binding	5	CYP11B2, ALOX5, TBXAS1, CYP2C19, CYP19A1	0.0345284	4.06277
MF	BH3 domain binding	4	BCL2, BAX, BCL2L1, MCL1	1.28483e-05	75.8384
MF	retinoid X receptor binding	4	VDR, NR1H2, RARB, PPARG	0.000485265	25.2795
MF	chemokine receptor activity	4	CCR1, CXCR4, CCR5, CCR3	0.000485265	25.2795
MF	steroid hormone receptor activity	4	RXRA, PGR, PPARA, ESR1	0.00101996	19.7839
MF	C-C chemokine receptor activity	4	CCR1, CXCR4, CCR5, CCR3	0.00101996	19.7839
MF	R-SMAD binding	4	JUN, PARP1, PPARG, FOS	0.00115823	18.9596
MF	C-C chemokine binding	4	CCR1, CXCR4, CCR5, CCR3	0.00115823	18.9596
MF	insulin receptor binding	4	APP, SRC, PTPN11, IGF1R	0.00115823	18.9596
MF	steroid binding	4	PGR, NR3C1, SHBG, ESR1	0.00223588	15.1677
MF	cyclin binding	4	CDKN1A, CDK4, CDK2, CDK1	0.00321239	13.3832
MF	protein phosphatase 2A binding	4	STAT1, BCL2, HMGCR, TP53	0.00349123	13.0009
MF	coreceptor activity	4	CD86, CD80, CXCR4, CCR5	0.00547317	11.0983
MF	ligand-dependent nuclear receptor binding	4	RXRA, STAT1, EP300, HIF1A	0.0066715	10.3416
MF	Hsp90 protein binding	4	KDR, NR3C1, HIF1A, HDAC6	0.0066715	10.3416
MF	estrogen receptor binding	4	PARP1, SRC, PPARG, ESR1	0.00710281	10.1118
MF	RNA polymerase II activating transcription factor binding	4	CREBBP, JUN, EP300, FOS	0.00899117	9.28633
MF	oxidoreductase activity, acting on paired donors, with incorporation or reduction of molecular oxygen	4	CYP11B2, TBXAS1, CYP2C19, CYP19A1	0.0148929	7.71238
MF	serine-type peptidase activity	4	DPP4, CMA1, PREP, PRCP	0.0155782	7.58384
MF	damaged DNA binding	4	POLB, CREBBP, EP300, TP63	0.018495	7.10985
MF	heterocyclic compound binding	3	FABP1, ACE, DRD2	0.000745782	68.2545
MF	type 1 angiotensin receptor binding	3	EDNRB, BDKRB2, JAK2	0.00154821	48.7532
MF	nitric-oxide synthase regulator activity	3	HSP90AA1, ESR1, EGFR	0.00262374	37.9192
MF	non-membrane spanning protein tyrosine phosphatase activity	3	PTPN11, ACP1, PTPN2	0.00326089	34.1273
MF	cysteine-type endopeptidase activity involved in apoptotic signaling pathway	3	CASP8, CASP3, CASP1	0.00326089	34.1273
MF	MDM2/MDM4 family protein binding	3	PPARA, TP53, TP63	0.00472807	28.4394
MF	STAT family protein binding	3	EP300, PPARG, PTPN2	0.00472807	28.4394
MF	RNA polymerase II carboxy-terminal domain kinase activity	3	CDK4, CDK1, BRD4	0.00472807	28.4394
MF	oxidoreductase activity, acting on single donors with incorporation of molecular oxygen, incorporation of two atoms of oxygen	3	ALOX5, PTGS2, PTGS1	0.00840186	21.3295
MF	core promoter sequence-specific DNA binding	3	MYC, NR3C1, TP53	0.00946785	20.0749
MF	carboxypeptidase activity	3	ACE2, ACE, PRCP	0.0156293	15.5124
MF	phosphatidylinositol 3-kinase binding	3	PDGFRB, JAK2, IGF1R	0.0170207	14.8379
MF	phospholipase binding	3	SYK, SRC, PTPN11	0.0199545	13.6509
MF	phosphatidylinositol phospholipase C activity	3	CCR1, BDKRB2, CCR5	0.0214949	13.1259
MF	histone acetyltransferase binding	3	STAT1, HIF1A, TP53	0.0230832	12.6397
MF	nuclear hormone receptor binding	3	STAT1, EP300, HIF1A	0.0230832	12.6397
MF	cyclin-dependent protein serine/threonine kinase activity	3	CDK4, CDK2, CDK1	0.0263992	11.768
MF	G-protein alpha-subunit binding	3	F2RL1, HTR2A, IGF1R	0.0263992	11.768
MF	ephrin receptor binding	3	APP, SRC, PIK3CG	0.0281251	11.3758
MF	steroid hydroxylase activity	3	CYP11B2, CYP2C19, CYP19A1	0.0335639	10.3416
MF	RNA polymerase II repressing transcription factor binding	3	STAT3, PPARG, PPARA	0.0373985	9.75065
MF	protein tyrosine kinase binding	3	HSP90AA1, PTEN, PTPN11	0.0373985	9.75065
MF	activating transcription factor binding	3	MYC, EP300, PPARG	0.0373985	9.75065
MF	peroxidase activity	3	PTGS2, MPO, PTGS1	0.0393757	9.4798
MF	oxygen binding	3	ALB, CYP2C19, CYP19A1	0.0393757	9.4798
MF	disordered domain specific binding	3	HSP90AA1, MDM2, TP53	0.041392	9.22359
MF	dioxygenase activity	3	KDM5C, PTGS2, PTGS1	0.041392	9.22359
MF	fatty acid binding	3	FABP1, FABP3, ALB	0.0434462	8.98086
MF	peptide N-acetyltransferase activity	2	CREBBP, EP300	0.0173988	113.758
MF	bradykinin receptor binding	2	ACE, AGTR1	0.0173988	113.758
MF	bradykinin receptor activity	2	BDKRB2, BDKRB1	0.0173988	113.758
MF	cyclin-dependent protein kinase activity	2	CDK2, CDK1	0.0173988	113.758
MF	prostaglandin-endoperoxide synthase activity	2	PTGS2, PTGS1	0.0173988	113.758
MF	arachidonate 5-lipoxygenase activity	2	ALOX5, ALOX5AP	0.0173988	113.758
MF	chemokine (C-C motif) ligand 5 binding	2	CCR1, CCR5	0.0173988	113.758
MF	vitamin D response element binding	2	RXRA, VDR	0.0259851	75.8384
MF	oleic acid binding	2	FABP1, FABP3	0.0259851	75.8384
MF	oligopeptidase activity	2	MME, PREP	0.0259851	75.8384
MF	histone kinase activity	2	CDK2, CDK1	0.0259851	75.8384
MF	peptidyl-dipeptidase activity	2	ACE2, ACE	0.0259851	75.8384
MF	DBD domain binding	2	RXRA, PPARG	0.0344967	56.8788
MF	angiotensin type II receptor activity	2	AGTR1, AGTR2	0.0344967	56.8788
MF	exopeptidase activity	2	ACE, MME	0.0344967	56.8788
MF	dopamine neurotransmitter receptor activity	2	DRD1, DRD2	0.0429345	45.503
MF	phosphatidylinositol 3-kinase activity	2	PIK3CA, PIK3CG	0.0429345	45.503
CC	cytosol	83	APP, CDKN1A, KDM5C, PREP, PTEN, AKR1B1, HTR2A, KIF11, NR3C1, PIK3CG, CASP8, CCND1, CA2, CASP3, CASP1, EP300, JAK2, PDE8B, JAK3, ACP1, JAK1, G6PD, HSP90AA1, SYK, PRKCD, PRKCA, FOS, RHOA, VAV1, ADAM17, MMP14, PIK3CA, PDE5A, PPARG, PGR, SGK1, PPIA, TP53, BIRC2, YAP1, SRC, XIAP, NOD1, TYMS, HIF1A, HDAC6, AURKA, PSMB5, RXRA, TERT, ALOX5, ERBB2, ELANE, MCL1, MAPK3, JUN, GSTM1, NOS2, CMA1, STAT1, VDR, E…	1.87047e-10	1.87696
CC	cytoplasm	81	APP, CD40, PREP, PTEN, NR3C1, PIK3CG, IGF1R, POLB, CASP8, CCND1, CA2, CASP3, CASP1, EP300, JAK2, CCR5, ACP1, TP63, CCR3, JAK1, PDGFRB, G6PD, HSP90AA1, PARP1, SYK, MME, PRKCD, PRKCA, ADAM17, MMP14, PIK3CA, TLR9, RARB, PPARG, PGR, SGK1, PPIA, TP53, BIRC2, YAP1, SRC, CXCR4, XIAP, NOD1, TYMS, CYP2C19, PTGS2, PLA2G7, HIF1A, HDAC6, EGFR, PTGS1, PSMB5, TERT, ALOX5, ELANE, MCL1, MAPK3, CCR1, CREBBP, GSTM…	9.28341e-10	1.84643
CC	nucleus	79	APP, CDKN1A, KDM5C, PREP, PTEN, KIF11, NR3C1, MPO, IGF1R, POLB, CCND1, MYC, CASP3, KDR, EP300, JAK2, TP63, JAK1, PDGFRB, G6PD, HSP90AA1, PARP1, SYK, MMP2, PRKCD, PRKCA, FOS, RHOA, TGFBR1, MMP14, RARB, PPARG, PGR, SGK1, PPARA, PPIA, TP53, BIRC2, YAP1, CXCR4, XIAP, TYMS, HIF1A, HDAC6, EGFR, AURKA, PSMB5, RXRA, TERT, ERBB2, DRD1, BRD4, MCL1, MAPK3, JUN, CREBBP, NOS2, STAT1, VDR, NR1H2, STAT3, NR1H3,…	3.59407e-07	1.65087
CC	plasma membrane	77	CD86, ALK, APP, CD40, FLT1, CD81, CD80, PTEN, ECE1, HTR2A, PIK3CG, IGF1R, EDNRB, PLAU, CA2, CASP1, KDR, BDKRB2, BDKRB1, JAK2, CCR5, JAK3, CCR3, PDGFRB, HSP90AA1, SYK, MME, IFNGR1, MMP2, PRKCD, PRKCA, F2, RHOA, TGFBR1, VAV1, ACE2, ADAM17, MMP14, PIK3CA, AGTR1, TLR9, AGTR2, SGK1, MET, CD274, SLC22A6, SRC, PTGER2, C5AR1, CXCR4, PRCP, SLC5A1, EGFR, CRHR1, DPP4, C3, TERT, ERBB2, DRD1, CD14, DRD2, MAPK…	1.02844e-09	1.89753
CC	nucleoplasm	60	CDKN1A, KDM5C, PTEN, AKR1B1, NR3C1, MPO, POLB, CASP8, CCND1, MYC, CASP3, EP300, JAK2, TP63, HSP90AA1, PARP1, PRKCD, PRKCA, FOS, RARB, PPARG, PGR, SGK1, PPARA, TP53, YAP1, CD274, SRC, XIAP, HIF1A, HDAC6, AURKA, PSMB5, RXRA, TERT, ALOX5, BRD4, MCL1, MAPK3, JUN, CREBBP, NOS2, STAT1, VDR, NR1H2, STAT3, NR1H3, PTPN11, MAPK14, ESR1, MTOR, NFKBIA, FABP1, CDK4, CDK2, BCL2, CDK1, MDM2, PTPN6, PTPN2	2.55788e-07	1.90649
CC	extracellular exosome	46	CD86, ALK, CD274, APP, SLC22A6, CD40, CD81, SRC, AKR1B1, CXCR4, ECE1, PRCP, SLC5A1, MPO, PTGS1, DPP4, C3, PSMB5, PLAU, CA2, CD14, TIMP1, ACP1, ELANE, G6PD, HSP90AA1, MMP7, ACE, MME, EPHX2, PLA2G2A, PRKCD, PRKCA, F2, MMP9, RHOA, FABP1, ACE2, FABP3, RBP4, ALB, CDK1, BAX, PTPN6, SHBG, PPIA	4.08938e-09	2.53562
CC	extracellular region	44	APP, PRSS1, PLA2G1B, PTEN, MPO, PLA2G7, DPP4, C3, ADAMTS5, PLAU, ALOX5, CASP1, KDR, CD14, TIMP1, ELANE, BCHE, HSP90AA1, MMP7, ACE, F10, IFNB1, MMP1, CMA1, MMP2, PLA2G2A, PRKCD, MMP3, MAPK14, F2, MMP9, IL2, IL4, ACE2, RBP4, IFNG, COL4A4, COL7A1, ALB, TLR9, PTPN6, SHBG, MET, PPIA	9.96688e-09	2.53995
CC	membrane	40	YAP1, APP, CD81, PREP, ECE1, KIF11, CYP19A1, EGFR, PIK3CG, CRHR1, IGF1R, DPP4, CCND1, JAK2, JAK3, JAK1, MCL1, PDGFRB, BCHE, G6PD, HSP90AA1, ACE, PARP1, IFNGR1, PRKCD, PRKCA, FOS, ESR1, TGFBR1, MTOR, ADAM17, PIK3CA, COL4A4, ALOX5AP, BCL2, CDK1, BAX, PTPN6, MET, PPIA	4.3802e-05	1.94673
CC	macromolecular complex	33	ALK, APP, CDKN1A, SLC22A6, CXCR4, KIF11, NR3C1, PTGS2, HIF1A, HDAC6, EGFR, C3, POLB, CASP8, MYC, CASP1, TP63, MAPK3, NTRK1, HSP90AA1, SYK, PARP1, STAT1, PTPN11, ESR1, FABP1, RBP4, ALB, BCL2, MDM2, PTPN6, PPIA, TP53	1.02808e-15	5.82775
CC	extracellular space	38	APP, PRSS1, CD40, FLT1, PLA2G1B, AKR1B1, MPO, EGFR, C3, ADAMTS5, PLAU, CA2, ALOX5, CD14, TIMP1, ELANE, BCHE, MMP7, ACE, F10, IFNB1, CMA1, MMP2, PLA2G2A, MMP3, F2, MMP9, IL2, IL4, ACE2, MMP14, FABP3, RBP4, IFNG, COL4A4, COL7A1, ALB, PPIA	4.68257e-07	2.43005
CC	integral component of plasma membrane	33	ALK, APP, SLC22A6, CD40, FLT1, CD81, PTGER2, C5AR1, HTR2A, SLC5A1, EGFR, CRHR1, IGF1R, EDNRB, ERBB2, KDR, BDKRB2, BDKRB1, DRD1, CCR5, DRD2, CCR3, CCR1, PDGFRB, NTRK1, MME, IFNGR1, ADAM17, MMP14, AGTR1, F2RL1, AGTR2, MET	1.82028e-07	2.78701
CC	mitochondrion	27	APP, MAOB, SRC, PTEN, TYMS, NR3C1, CASP8, RXRA, MYC, CASP1, TP63, MCL1, MAPK3, HSP90AA1, PARP1, MMP2, PRKCD, PRKCA, PTPN11, MAPK14, CYP11B2, BCL2, CDK1, BAX, SGK1, TP53, BCL2L1	7.71582e-05	2.3302
CC	cell surface	21	PDGFRB, CD86, NTRK1, APP, CD40, MMP7, MME, PLA2G1B, CD80, C5AR1, CXCR4, EGFR, TGFBR1, DPP4, C3, ACE2, ADAM17, PLAU, CCR5, MET, ELANE	1.60351e-07	4.14592
CC	perinuclear region of cytoplasm	21	APP, CDKN1A, HSP90AA1, NOS2, STAT1, SRC, PLA2G2A, PRKCD, AKR1B1, ECE1, PRKCA, SLC5A1, EGFR, HDAC6, AURKA, PIK3CA, CDK4, ALOX5, ERBB2, PPARG, AGTR2	3.42802e-06	3.40362
CC	chromatin	21	CREBBP, JUN, STAT1, VDR, NR1H2, STAT3, NR1H3, FOS, NR3C1, HIF1A, ESR1, RXRA, CDK4, MYC, RARB, PGR, PPARG, PPARA, TP53, TP63, BRD4	0.00025334	2.50618
CC	endoplasmic reticulum	18	APP, PLA2G2A, PRKCD, PRKCA, FOS, HMGCR, PTGS2, CYP19A1, ALOX5AP, ALB, KDR, BCL2, TLR9, BAX, BDKRB1, TP53, PTPN2, BCL2L1	0.00929285	1.97638
CC	endoplasmic reticulum membrane	17	PLA2G2A, HMGCR, PTGS2, CYP2C19, CYP19A1, RHOA, EGFR, MTOR, PTGS1, TBXAS1, ALOX5AP, BCL2, CDK1, TLR9, BAX, DRD1, SGK1	0.00900442	2.03877
CC	focal adhesion	16	PDGFRB, FLT1, MME, CD81, SRC, RHOA, EGFR, PTK2, DPP4, MMP14, ADAM17, PLAU, JAK2, PPIA, JAK1, MAPK3	1.94926e-06	4.63341
CC	receptor complex	15	PDGFRB, ALK, NTRK1, APP, FLT1, VDR, NR1H3, EGFR, TGFBR1, IGF1R, RXRA, ERBB2, KDR, PPARG, MET	2.75764e-09	8.48653
CC	membrane raft	15	APP, MME, SRC, EGFR, TGFBR1, DPP4, ACE2, ADAM17, CASP8, EDNRB, CASP3, KDR, CD14, JAK2, BIRC2	1.78603e-08	7.33236
CC	endosome	15	APP, ACE, FLT1, ECE1, RHOA, EGFR, TGFBR1, CRHR1, CDK2, KDR, BDKRB2, TLR9, CCR5, JAK3, JAK1	2.88335e-07	5.85652
CC	endoplasmic reticulum lumen	14	BCHE, APP, F10, F2, PTGS2, C3, ACE2, ADAMTS5, ADAM17, COL4A4, COL7A1, ALB, TIMP1, MAPK3	1.43675e-06	5.57291
CC	external side of plasma membrane	13	CD86, CCR1, CD274, CD40, ACE, CD80, CXCR4, ECE1, F2, KDR, CD14, CCR5, CCR3	0.000305603	3.55409
CC	transcription factor complex	12	CREBBP, JUN, RXRA, PARP1, CDK4, STAT3, CDK2, EP300, FOS, HIF1A, ESR1, TP53	2.73966e-06	6.4319
CC	RNA polymerase II transcription factor complex	10	JUN, RXRA, STAT1, VDR, NR1H2, STAT3, NR1H3, PPARG, FOS, HIF1A	3.62154e-07	10.8147
CC	early endosome	10	NTRK1, APP, MME, ERBB2, KDR, F2RL1, CXCR4, ECE1, SLC5A1, MAPK3	0.000529467	4.31824
CC	axon	10	NTRK1, APP, MME, STAT1, CA2, HTR2A, DRD2, RHOA, HDAC6, IGF1R	0.00223385	3.51167
CC	apical plasma membrane	10	PDGFRB, DPP4, ACE2, ADAM17, ERBB2, PTEN, TLR9, NOD1, SLC5A1, EGFR	0.00329829	3.31182
CC	mitochondrial outer membrane	9	CASP8, MAOB, PLA2G2A, BCL2, BAX, PGR, MTOR, BCL2L1, MCL1	0.000162251	5.81934
CC	caveola	8	SLC22A6, SRC, HTR2A, JAK2, PTGS2, HDAC6, IGF1R, MAPK3	3.08772e-06	12.6967
CC	basolateral plasma membrane	8	SLC22A6, CA2, CD81, ERBB2, C5AR1, TLR9, NOD1, EGFR	0.00302057	4.19592
CC	nuclear membrane	8	EDNRB, CCND1, CDK4, ALOX5, ALOX5AP, BCL2, EGFR, BCL2L1	0.00339666	4.10777
CC	extracellular matrix	8	ADAMTS5, MMP14, MMP7, MMP1, COL4A4, MMP2, MMP3, TIMP1	0.00500061	3.81894
CC	neuron projection	8	CASP8, SRC, PTEN, BDKRB1, FOS, PTGS2, CRHR1, PTGS1	0.027424	2.73086
CC	glutamatergic synapse	8	SRC, DRD1, HTR2A, DRD2, JAK2, MAPK14, RHOA, MTOR	0.0304043	2.67117
CC	neuronal cell body	8	NTRK1, HSP90AA1, CD40, MME, CASP3, HTR2A, MTOR, IGF1R	0.0454885	2.44412
CC	nuclear envelope	7	PARP1, ALOX5, MYC, ALOX5AP, BAX, MTOR, MAPK3	0.00515977	4.4095
CC	cytoplasmic vesicle	7	PDGFRB, MMP14, MME, ERBB2, CXCR4, HTR2A, RHOA	0.0482896	2.65665
CC	dendritic spine	6	APP, PTEN, DRD1, DRD2, PTK2, RHOA	0.0116005	4.41709
CC	cell-cell junction	6	APP, ADAM17, PRKCD, PTPN6, SLC5A1, VAV1	0.0196831	3.85914
CC	cyclin-dependent protein kinase holoenzyme complex	5	CDKN1A, CCND1, CDK4, CDK2, CDK1	0.000277906	15.6674
CC	spindle microtubule	5	POLB, CDK1, XIAP, KIF11, AURKA	0.000444414	13.8871
CC	basal plasma membrane	5	ACE, CD81, ERBB2, MET, EGFR	0.000782785	11.981
CC	transcriptional repressor complex	5	JUN, CCND1, MDM2, TP53, ELANE	0.0017302	9.69889
CC	secretory granule	5	PLA2G1B, CMA1, PLA2G2A, MPO, ELANE	0.00813662	6.29928
CC	secretory granule lumen	5	C3, HSP90AA1, ALOX5, MAPK14, PPIA	0.014518	5.31331
CC	ficolin-1-rich granule lumen	5	HSP90AA1, ALOX5, MAPK14, PPIA, MMP9	0.0186338	4.92766
CC	blood microparticle	5	C3, BCHE, PRSS1, ALB, F2	0.0301536	4.24327
CC	myelin sheath	4	HSP90AA1, CA2, ERBB2, BCL2	0.00285616	13.9664
CC	cytoplasmic side of plasma membrane	4	G6PD, PTEN, ACP1, BIRC2	0.0106843	8.729
CC	extrinsic component of cytoplasmic side of plasma membrane	4	SYK, SRC, PTK2, RHOA	0.0173088	7.29588
CC	phagocytic vesicle	4	TLR9, NOD1, ELANE, MTOR	0.0194339	6.9832
CC	azurophil granule lumen	4	C3, PRKCD, MPO, ELANE	0.0381611	5.37169
CC	collagen trimer	4	MMP1, COL4A4, COL7A1, TIMP1	0.0402923	5.25617
CC	ruffle membrane	4	ADAM17, SRC, RHOA, EGFR	0.0470388	4.93762
CC	secretory granule membrane	4	MME, C5AR1, CD14, RHOA	0.0494037	4.83984
CC	Bcl-2 family protein complex	3	BAX, BCL2L1, MCL1	0.00178273	45.8273
CC	nuclear envelope lumen	3	BCHE, APP, ALOX5	0.00283461	36.6618
CC	cyclin D1-CDK4 complex	2	CCND1, CDK4	0.0162009	122.206
CC	phosphatidylinositol 3-kinase complex, class IB	2	PIK3CA, PIK3CG	0.0321408	61.103
CC	transcription factor AP-1 complex	2	JUN, FOS	0.0400143	48.8824
CC	endolysosome	2	PRKCD, TLR9	0.0400143	48.8824
CC	phosphatidylinositol 3-kinase complex, class IA	2	PIK3CA, PIK3CG	0.0478241	40.7354

## Sheet: Table S6
Targets in signaling pathways related to THH against IgAN
Term	Genes
Pathways in cancer	ALK, CDKN1A, PTEN, IGF1R, CASP8, EDNRB, CCND1, MYC, CASP3, BDKRB2, BDKRB1, EP300, JAK2, JAK3, JAK1, PDGFRB, HSP90AA1, IFNGR1, MMP1, MMP2, PRKCA, FOS, F2, MMP9, RHOA, TGFBR1, IFNG, PIK3CA, COL4A4, AGTR1, RARB, PPARG, MET, TP53, BIRC2, PTGER2, CXCR4, XIAP, PTGS2, HIF1A, EGFR, RXRA, TERT, ERBB2, MAPK3, NTRK1, JUN, CREBBP, GSTM1, NOS2, STAT1, STAT3, ESR1, MTOR, IL2, PTK2, NFKBIA, IL4, CDK4, CDK2, BCL…
PI3K-Akt signaling pathway	CDKN1A, FLT1, PTEN, EGFR, PIK3CG, IGF1R, RXRA, CCND1, MYC, ERBB2, KDR, JAK2, JAK3, JAK1, MCL1, MAPK3, PDGFRB, NTRK1, HSP90AA1, SYK, IFNB1, PRKCA, IL2, MTOR, PTK2, IL4, PIK3CA, CDK4, COL4A4, CDK2, BCL2, MDM2, SGK1, MET, TP53, BCL2L1
Kaposi sarcoma-associated herpesvirus infection	CD86, CDKN1A, SRC, PTGS2, HIF1A, PIK3CG, C3, CASP8, CCND1, MYC, CASP3, EP300, JAK2, CCR5, CCR3, JAK1, MAPK3, CCR1, JUN, CREBBP, SYK, IFNB1, IFNGR1, STAT1, STAT3, FOS, MAPK14, MTOR, NFKBIA, PIK3CA, CDK4, BAX, TP53
Lipid and atherosclerosis	CD40, SRC, CASP8, RXRA, CASP3, CASP1, CD14, JAK2, MAPK3, JUN, HSP90AA1, IFNB1, MMP1, MMP3, STAT3, PRKCA, FOS, MAPK14, MMP9, RHOA, VAV1, PTK2, NFKBIA, PIK3CA, BCL2, BAX, PPARG, TP53, BCL2L1
Proteoglycans in cancer	CDKN1A, SRC, HIF1A, EGFR, IGF1R, CCND1, PLAU, MYC, CASP3, ERBB2, KDR, MAPK3, MMP2, STAT3, PRKCA, PTPN11, MAPK14, MMP9, ESR1, RHOA, MTOR, VAV1, PTK2, PIK3CA, MDM2, PTPN6, MET, TP53
Human cytomegalovirus infection	CDKN1A, SRC, PTGER2, CXCR4, PTGS2, EGFR, CASP8, CCND1, MYC, CASP3, CCR5, CCR3, JAK1, MAPK3, CCR1, IFNB1, STAT3, PRKCA, MAPK14, RHOA, MTOR, PTK2, NFKBIA, PIK3CA, CDK4, MDM2, BAX, TP53
Viral carcinogenesis	CDKN1A, SRC, HDAC6, C3, POLB, CASP8, CCND1, CASP3, EP300, CCR5, JAK3, CCR3, JAK1, MAPK3, JUN, CREBBP, SYK, STAT3, RHOA, NFKBIA, PIK3CA, CDK4, CDK2, CDK1, MDM2, BAX, TP53
Hepatitis B	CDKN1A, SRC, CASP8, MYC, CASP3, EP300, JAK2, JAK3, JAK1, MAPK3, JUN, CREBBP, IFNB1, STAT1, STAT3, PRKCA, FOS, MAPK14, MMP9, TGFBR1, NFKBIA, PIK3CA, CDK2, BCL2, BAX, TP53
JAK-STAT signaling pathway	CDKN1A, EGFR, CCND1, MYC, EP300, JAK2, JAK3, JAK1, MCL1, PDGFRB, CREBBP, IFNB1, IFNGR1, STAT1, STAT3, PTPN11, IL2, MTOR, IL4, IFNG, PIK3CA, BCL2, PTPN6, PTPN2, BCL2L1
Human T-cell leukemia virus 1 infection	CDKN1A, CD40, PTEN, XIAP, POLB, CCND1, TERT, MYC, EP300, JAK3, JAK1, MAPK3, JUN, CREBBP, MMP7, FOS, TGFBR1, IL2, NFKBIA, PIK3CA, CDK4, CDK2, BAX, TP53, BCL2L1
MicroRNAs in cancer	CDKN1A, PTEN, PTGS2, EGFR, CCND1, PLAU, MYC, CASP3, ERBB2, EP300, TP63, MCL1, MAPK3, PDGFRB, CREBBP, STAT3, PRKCA, MMP9, RHOA, MTOR, PIK3CA, BCL2, MDM2, MET, TP53
Coronavirus disease - COVID-19	JUN, ACE, SYK, IFNB1, STAT1, MMP1, STAT3, C5AR1, MMP3, PRKCA, FOS, F2, MAPK14, EGFR, IL2, C3, NFKBIA, ACE2, ADAM17, PIK3CA, CASP1, AGTR1, JAK1, MAPK3
Human papillomavirus infection	PDGFRB, CDKN1A, CREBBP, IFNB1, STAT1, PTEN, PTGS2, EGFR, MTOR, PTK2, CASP8, TERT, PIK3CA, CCND1, CDK4, CASP3, COL4A4, CDK2, MDM2, BAX, EP300, TP53, JAK1, MAPK3
Hepatitis C	CDKN1A, IFNB1, CD81, STAT1, STAT3, NR1H3, EGFR, NFKBIA, CASP8, RXRA, IFNG, PIK3CA, CCND1, CDK4, MYC, CASP3, CDK2, BAX, PPARA, TP53, JAK1, MAPK3
Tuberculosis	CREBBP, SYK, NOS2, IFNB1, IFNGR1, STAT1, SRC, VDR, MAPK14, RHOA, C3, CASP8, IFNG, CASP3, BCL2, TLR9, BAX, EP300, CD14, JAK2, JAK1, MAPK3
Transcriptional misregulation in cancer	CD86, NTRK1, CDKN1A, CD40, FLT1, MMP3, MPO, MMP9, PTK2, IGF1R, RXRA, PLAU, MYC, MDM2, BAX, PPARG, CD14, MET, TP53, ELANE, BIRC2, BCL2L1
Epstein-Barr virus infection	CDKN1A, JUN, CD40, SYK, IFNB1, STAT1, STAT3, MAPK14, NFKBIA, CASP8, PIK3CA, CCND1, CDK4, MYC, CASP3, CDK2, MDM2, BCL2, BAX, JAK3, TP53, JAK1
Chemical carcinogenesis - receptor activation	JUN, HSP90AA1, GSTM1, SRC, VDR, EPHX2, STAT3, XIAP, PRKCA, FOS, ESR1, EGFR, MTOR, RXRA, PIK3CA, CCND1, MYC, BCL2, PGR, JAK2, PPARA, MAPK3
PD-L1 expression and PD-1 checkpoint pathway in cancer	ALK, CD274, JUN, IFNGR1, STAT1, STAT3, PTEN, PTPN11, FOS, MAPK14, HIF1A, EGFR, MTOR, NFKBIA, IFNG, PIK3CA, TLR9, PTPN6, JAK2, JAK1, MAPK3
Small cell lung cancer	CDKN1A, NOS2, PTEN, XIAP, PTGS2, PTK2, NFKBIA, RXRA, PIK3CA, CCND1, CDK4, MYC, CASP3, COL4A4, CDK2, BCL2, BAX, RARB, TP53, BIRC2, BCL2L1
Prostate cancer	PDGFRB, CDKN1A, CREBBP, HSP90AA1, MMP3, PTEN, MMP9, EGFR, MTOR, IGF1R, NFKBIA, PIK3CA, CCND1, PLAU, ERBB2, CDK2, MDM2, BCL2, EP300, TP53, MAPK3
Endocrine resistance	CDKN1A, JUN, SRC, MMP2, FOS, MAPK14, ESR1, MMP9, EGFR, MTOR, PTK2, IGF1R, PIK3CA, CCND1, CDK4, ERBB2, MDM2, BCL2, BAX, TP53, MAPK3
Focal adhesion	PDGFRB, JUN, FLT1, SRC, PTEN, XIAP, PRKCA, RHOA, EGFR, VAV1, PTK2, IGF1R, PIK3CA, CCND1, COL4A4, ERBB2, KDR, BCL2, MET, BIRC2, MAPK3
Shigellosis	JUN, IFNB1, SRC, PRKCD, NOD1, MAPK14, RHOA, EGFR, MTOR, PTK2, C3, NFKBIA, PIK3CA, MDM2, CASP1, BCL2, BAX, CD14, TP53, BCL2L1, MAPK3
Herpes simplex virus 1 infection	SYK, IFNB1, IFNGR1, STAT1, SRC, PTPN11, MTOR, C3, NFKBIA, CASP8, IFNG, PIK3CA, CASP3, BCL2, TLR9, BAX, JAK2, TP53, BIRC2, JAK1, BCL2L1
Toxoplasmosis	CD40, NOS2, IFNGR1, STAT1, STAT3, XIAP, MAPK14, PIK3CG, NFKBIA, CASP8, IFNG, CASP3, ALOX5, BCL2, JAK2, CCR5, BIRC2, JAK1, BCL2L1, MAPK3
Measles	JUN, IFNB1, STAT1, STAT3, FOS, IL2, NFKBIA, CASP8, PIK3CA, CCND1, CDK4, CASP3, CDK2, BCL2, TLR9, BAX, JAK3, TP53, JAK1, BCL2L1
Th17 cell differentiation	JUN, HSP90AA1, IFNGR1, STAT1, STAT3, FOS, MAPK14, HIF1A, TGFBR1, IL2, MTOR, IL4, NFKBIA, RXRA, IFNG, JAK2, JAK3, JAK1, MAPK3
Salmonella infection	JUN, HSP90AA1, NOD1, FOS, MAPK14, RHOA, PIK3CG, NFKBIA, CASP8, PIK3CA, MYC, CASP3, CASP1, BCL2, TLR9, BAX, CD14, BIRC2, MAPK3
EGFR tyrosine kinase inhibitor resistance	PDGFRB, SRC, STAT3, PTEN, PRKCA, EGFR, MTOR, IGF1R, PIK3CA, ERBB2, KDR, BCL2, BAX, JAK2, MET, JAK1, BCL2L1, MAPK3
AGE-RAGE signaling pathway in diabetic complications	JUN, STAT1, MMP2, PRKCD, STAT3, PRKCA, MAPK14, TGFBR1, PIK3CA, CCND1, CDK4, CASP3, COL4A4, BCL2, AGTR1, BAX, JAK2, MAPK3
HIF-1 signaling pathway	CDKN1A, CREBBP, FLT1, NOS2, IFNGR1, STAT3, PRKCA, HIF1A, EGFR, MTOR, IGF1R, IFNG, PIK3CA, ERBB2, BCL2, EP300, TIMP1, MAPK3
Hepatocellular carcinoma	CDKN1A, GSTM1, PTEN, PRKCA, EGFR, TGFBR1, MTOR, IGF1R, TERT, PIK3CA, CCND1, CDK4, MYC, BAX, MET, TP53, BCL2L1, MAPK3
Influenza A	CREBBP, PRSS1, IFNB1, IFNGR1, STAT1, PRKCA, NFKBIA, CASP8, IFNG, PIK3CA, CDK4, CASP3, CASP1, BAX, EP300, JAK2, JAK1, MAPK3
Human immunodeficiency virus 1 infection	JUN, IFNB1, CXCR4, PRKCA, FOS, MAPK14, MTOR, PTK2, NFKBIA, CASP8, PIK3CA, CASP3, BCL2, CDK1, BAX, CCR5, BCL2L1, MAPK3
MAPK signaling pathway	PDGFRB, NTRK1, JUN, FLT1, PRKCA, FOS, MAPK14, EGFR, TGFBR1, IGF1R, MYC, CASP3, ERBB2, KDR, CD14, MET, TP53, MAPK3
Chagas disease	JUN, ACE, NOS2, IFNB1, IFNGR1, FOS, MAPK14, TGFBR1, IL2, C3, NFKBIA, CASP8, IFNG, PIK3CA, BDKRB2, TLR9, MAPK3
Breast cancer	CDKN1A, JUN, PTEN, FOS, ESR1, EGFR, MTOR, IGF1R, PIK3CA, CCND1, CDK4, MYC, ERBB2, BAX, PGR, TP53, MAPK3
Gastric cancer	CDKN1A, EGFR, TGFBR1, MTOR, RXRA, TERT, PIK3CA, CCND1, MYC, ERBB2, CDK2, BCL2, BAX, RARB, MET, TP53, MAPK3
Necroptosis	HSP90AA1, PARP1, IFNB1, IFNGR1, STAT1, STAT3, XIAP, CASP8, IFNG, CASP1, BCL2, BAX, JAK2, PPIA, JAK3, BIRC2, JAK1
NOD-like receptor signaling pathway	JUN, HSP90AA1, IFNB1, STAT1, PRKCD, XIAP, NOD1, MAPK14, RHOA, NFKBIA, CASP8, CASP1, BCL2, BIRC2, JAK1, BCL2L1, MAPK3
Chemokine signaling pathway	CCR1, STAT1, SRC, PRKCD, STAT3, CXCR4, RHOA, PIK3CG, VAV1, PTK2, NFKBIA, PIK3CA, JAK2, CCR5, JAK3, CCR3, MAPK3
Chemical carcinogenesis - reactive oxygen species	JUN, GSTM1, SRC, EPHX2, PRKCD, PTEN, PTPN11, FOS, MAPK14, HIF1A, EGFR, PTK2, NFKBIA, PIK3CA, MET, ACP1, MAPK3
Non-small cell lung cancer	ALK, CDKN1A, STAT3, PRKCA, EGFR, RXRA, PIK3CA, CCND1, CDK4, ERBB2, BAX, RARB, JAK3, MET, TP53, MAPK3
C-type lectin receptor signaling pathway	JUN, SYK, STAT1, SRC, PRKCD, PTPN11, PTGS2, MAPK14, RHOA, IL2, NFKBIA, CASP8, PIK3CA, MDM2, CASP1, MAPK3
Relaxin signaling pathway	JUN, NOS2, MMP1, SRC, MMP2, PRKCA, FOS, MAPK14, MMP9, EGFR, TGFBR1, NFKBIA, EDNRB, PIK3CA, COL4A4, MAPK3
Apoptosis	NTRK1, JUN, PARP1, XIAP, FOS, NFKBIA, CASP8, PIK3CA, CASP3, BCL2, BAX, TP53, BIRC2, MCL1, BCL2L1, MAPK3
Calcium signaling pathway	PDGFRB, NTRK1, FLT1, NOS2, CXCR4, PRKCA, HTR2A, EGFR, EDNRB, ERBB2, KDR, BDKRB2, AGTR1, BDKRB1, DRD1, MET
Neuroactive ligand-receptor interaction	PRSS1, PTGER2, C5AR1, HTR2A, F2, NR3C1, CRHR1, C3, EDNRB, BDKRB2, AGTR1, F2RL1, BDKRB1, DRD1, AGTR2, DRD2
Pancreatic cancer	CDKN1A, STAT1, STAT3, EGFR, TGFBR1, MTOR, PIK3CA, CCND1, CDK4, ERBB2, BAX, TP53, JAK1, BCL2L1, MAPK3
Leishmaniasis	JUN, NOS2, IFNGR1, STAT1, FOS, PTGS2, MAPK14, IL4, C3, NFKBIA, IFNG, PTPN6, JAK2, JAK1, MAPK3
Colorectal cancer	CDKN1A, JUN, FOS, RHOA, EGFR, TGFBR1, MTOR, PIK3CA, CCND1, MYC, CASP3, BCL2, BAX, TP53, MAPK3
Thyroid hormone signaling pathway	CREBBP, STAT1, SRC, PRKCA, HIF1A, ESR1, MTOR, RXRA, PIK3CA, CCND1, MYC, MDM2, EP300, TP53, MAPK3
FoxO signaling pathway	CDKN1A, CREBBP, STAT3, PTEN, MAPK14, EGFR, TGFBR1, IGF1R, PIK3CA, CCND1, CDK2, MDM2, EP300, SGK1, MAPK3
Fluid shear stress and atherosclerosis	JUN, HSP90AA1, GSTM1, SRC, MMP2, FOS, MAPK14, MMP9, RHOA, PTK2, IFNG, PIK3CA, KDR, BCL2, TP53
Diabetic cardiomyopathy	G6PD, ACE, PARP1, CMA1, MMP2, PRKCD, PTEN, PRKCA, MAPK14, MMP9, TGFBR1, MTOR, PIK3CA, AGTR1, PPARA
Ras signaling pathway	PDGFRB, NTRK1, FLT1, PLA2G1B, PLA2G2A, PRKCA, PTPN11, RHOA, EGFR, IGF1R, PIK3CA, KDR, MET, BCL2L1, MAPK3
Platinum drug resistance	CDKN1A, GSTM1, XIAP, CASP8, PIK3CA, CASP3, ERBB2, MDM2, BCL2, BAX, TP53, BIRC2, BCL2L1, MAPK3
Glioma	PDGFRB, CDKN1A, PTEN, PRKCA, EGFR, MTOR, IGF1R, PIK3CA, CCND1, CDK4, MDM2, BAX, TP53, MAPK3
IL-17 signaling pathway	JUN, HSP90AA1, MMP1, MMP3, FOS, PTGS2, MAPK14, MMP9, IL4, NFKBIA, CASP8, IFNG, CASP3, MAPK3
Toll-like receptor signaling pathway	CD86, JUN, CD40, IFNB1, STAT1, CD80, FOS, MAPK14, NFKBIA, CASP8, PIK3CA, TLR9, CD14, MAPK3
TNF signaling pathway	JUN, IFNB1, MMP3, FOS, PTGS2, MAPK14, MMP9, NFKBIA, MMP14, CASP8, PIK3CA, CASP3, BIRC2, MAPK3
Osteoclast differentiation	JUN, SYK, IFNB1, IFNGR1, STAT1, FOS, MAPK14, TGFBR1, NFKBIA, IFNG, PIK3CA, PPARG, JAK1, MAPK3
Cellular senescence	CDKN1A, PTEN, MAPK14, TGFBR1, MTOR, PIK3CA, CCND1, CDK4, MYC, CDK2, MDM2, CDK1, TP53, MAPK3
Pathogenic Escherichia coli infection	JUN, SRC, PTPN11, FOS, F2, MAPK14, RHOA, NFKBIA, CASP8, CASP3, CASP1, BAX, PTPN6, MAPK3
Rap1 signaling pathway	PDGFRB, FLT1, SRC, PRKCA, MAPK14, RHOA, EGFR, VAV1, IGF1R, PIK3CA, KDR, DRD2, MET, MAPK3
cAMP signaling pathway	CREBBP, JUN, PTGER2, FOS, RHOA, VAV1, CRHR1, NFKBIA, PIK3CA, EP300, DRD1, DRD2, PPARA, MAPK3
Bladder cancer	CDKN1A, MMP1, SRC, MMP2, MMP9, EGFR, CCND1, CDK4, MYC, ERBB2, MDM2, TP53, MAPK3
Central carbon metabolism in cancer	PDGFRB, NTRK1, G6PD, PTEN, HIF1A, EGFR, MTOR, PIK3CA, MYC, ERBB2, MET, TP53, MAPK3
Melanoma	PDGFRB, CDKN1A, PTEN, EGFR, IGF1R, PIK3CA, CCND1, CDK4, MDM2, BAX, MET, TP53, MAPK3
p53 signaling pathway	CDKN1A, PTEN, CASP8, CCND1, CDK4, CASP3, CDK2, MDM2, BCL2, CDK1, BAX, TP53, BCL2L1
Chronic myeloid leukemia	CDKN1A, PTPN11, TGFBR1, NFKBIA, PIK3CA, CCND1, CDK4, MYC, MDM2, BAX, TP53, BCL2L1, MAPK3
Th1 and Th2 cell differentiation	JUN, IFNGR1, STAT1, FOS, MAPK14, IL2, IL4, NFKBIA, IFNG, JAK2, JAK3, JAK1, MAPK3
T cell receptor signaling pathway	JUN, FOS, MAPK14, RHOA, IL2, VAV1, IL4, NFKBIA, IFNG, PIK3CA, CDK4, PTPN6, MAPK3
Yersinia infection	JUN, IFNB1, SRC, FOS, MAPK14, RHOA, IL2, VAV1, PTK2, NFKBIA, PIK3CA, CASP1, MAPK3
Estrogen signaling pathway	JUN, HSP90AA1, SRC, MMP2, PRKCD, FOS, ESR1, MMP9, EGFR, PIK3CA, BCL2, PGR, MAPK3
Neutrophil extracellular trap formation	SYK, SRC, C5AR1, PRKCA, MAPK14, MPO, MTOR, HDAC6, C3, PIK3CA, CASP1, ELANE, MAPK3
Adherens junction	CREBBP, SRC, ERBB2, EP300, PTPN6, ACP1, MET, RHOA, EGFR, TGFBR1, IGF1R, MAPK3
Growth hormone synthesis, secretion and action	CREBBP, PIK3CA, STAT1, STAT3, EP300, PRKCA, FOS, JAK2, MAPK14, PTK2, MTOR, MAPK3
Neurotrophin signaling pathway	NTRK1, NFKBIA, JUN, PIK3CA, PRKCD, BCL2, BAX, PTPN11, MAPK14, TP53, RHOA, MAPK3
Phospholipase D signaling pathway	PDGFRB, SYK, PIK3CA, AGTR1, PTPN11, PRKCA, F2, RHOA, EGFR, MTOR, PIK3CG, MAPK3
Regulation of actin cytoskeleton	PDGFRB, PIK3CA, SRC, BDKRB2, CXCR4, BDKRB1, F2, VAV1, PTK2, RHOA, EGFR, MAPK3
Pertussis	C3, JUN, NOS2, CASP3, CASP1, NOD1, FOS, CD14, MAPK14, RHOA, MAPK3
ErbB signaling pathway	CDKN1A, JUN, PIK3CA, SRC, MYC, ERBB2, PRKCA, PTK2, EGFR, MTOR, MAPK3
Inflammatory mediator regulation of TRP channels	NTRK1, PIK3CA, SRC, PTGER2, PRKCD, BDKRB2, F2RL1, BDKRB1, PRKCA, HTR2A, MAPK14
NF-kappa B signaling pathway	NFKBIA, CD40, SYK, PARP1, PLAU, BCL2, XIAP, CD14, PTGS2, BIRC2, BCL2L1
Natural killer cell mediated cytotoxicity	IFNG, SYK, PIK3CA, IFNB1, IFNGR1, CASP3, PTPN6, PTPN11, PRKCA, VAV1, MAPK3
Alcoholic liver disease	FABP1, NFKBIA, C3, CASP8, CCND1, IFNB1, CASP3, C5AR1, CD14, MAPK14, PPARA
Oxytocin signaling pathway	CDKN1A, JUN, CCND1, SRC, PRKCA, FOS, PTGS2, RHOA, EGFR, PIK3CG, MAPK3
Non-alcoholic fatty liver disease	JUN, RXRA, CASP8, PIK3CA, CASP3, BAX, NR1H3, PPARG, FOS, MAPK14, PPARA
Cytokine-cytokine receptor interaction	IL4, CCR1, CD40, IFNG, IFNB1, IFNGR1, CXCR4, CCR5, CCR3, TGFBR1, IL2
Endometrial cancer	CDKN1A, CCND1, PIK3CA, MYC, ERBB2, PTEN, BAX, TP53, EGFR, MAPK3
Prolactin signaling pathway	CCND1, PIK3CA, STAT1, SRC, STAT3, FOS, JAK2, MAPK14, ESR1, MAPK3
Epithelial cell signaling in Helicobacter pylori infection	NFKBIA, ADAM17, JUN, SRC, CASP3, PTPN11, NOD1, MAPK14, MET, EGFR
Parathyroid hormone synthesis, secretion and action	CDKN1A, MMP14, RXRA, VDR, BCL2, PRKCA, FOS, RHOA, EGFR, MAPK3
Insulin resistance	NFKBIA, PIK3CA, NR1H2, STAT3, PRKCD, PTEN, NR1H3, PTPN11, PPARA, MTOR
Leukocyte transendothelial migration	PIK3CA, MMP2, CXCR4, PTPN11, PRKCA, MAPK14, MMP9, VAV1, PTK2, RHOA
Serotonergic synapse	APP, MAOB, ALOX5, CASP3, PRKCA, HTR2A, CYP2C19, PTGS2, MAPK3, PTGS1
Sphingolipid signaling pathway	PIK3CA, PTEN, BDKRB2, BCL2, BAX, PRKCA, MAPK14, TP53, RHOA, MAPK3
Platelet activation	SYK, PIK3CA, SRC, TBXAS1, F2, MAPK14, RHOA, PIK3CG, MAPK3, PTGS1
Cell cycle	CDKN1A, CREBBP, CCND1, CDK4, MYC, CDK2, MDM2, CDK1, EP300, TP53
Thyroid cancer	NTRK1, CDKN1A, RXRA, CCND1, MYC, BAX, PPARG, TP53, MAPK3
Fc epsilon RI signaling pathway	IL4, SYK, PIK3CA, ALOX5, ALOX5AP, PRKCA, MAPK14, VAV1, MAPK3
Renal cell carcinoma	CDKN1A, CREBBP, JUN, PIK3CA, EP300, PTPN11, HIF1A, MET, MAPK3
B cell receptor signaling pathway	NFKBIA, JUN, SYK, PIK3CA, CD81, PTPN6, FOS, VAV1, MAPK3
Gap junction	PDGFRB, SRC, CDK1, PRKCA, DRD1, HTR2A, DRD2, EGFR, MAPK3
GnRH signaling pathway	MMP14, JUN, SRC, MMP2, PRKCD, PRKCA, MAPK14, EGFR, MAPK3
Choline metabolism in cancer	PDGFRB, JUN, PIK3CA, PRKCA, FOS, HIF1A, EGFR, MTOR, MAPK3
Progesterone-mediated oocyte maturation	HSP90AA1, PIK3CA, CDK2, CDK1, PGR, MAPK14, AURKA, IGF1R, MAPK3
Autophagy - animal	PIK3CA, PRKCD, PTEN, BCL2, HIF1A, MTOR, BCL2L1, IGF1R, MAPK3
Signaling pathways regulating pluripotency of stem cells	PIK3CA, MYC, STAT3, JAK2, MAPK14, JAK3, JAK1, IGF1R, MAPK3
Cushing syndrome	CDKN1A, CCND1, CDK4, CDK2, AGTR1, PDE8B, CRHR1, EGFR, MAPK3
Wnt signaling pathway	CREBBP, JUN, MMP7, CCND1, MYC, EP300, PRKCA, TP53, RHOA
Axon guidance	PIK3CA, SRC, CXCR4, PTPN11, PRKCA, MET, PTK2, RHOA, MAPK3
Renin-angiotensin system	ACE2, ACE, MME, CMA1, AGTR1, PREP, PRCP, AGTR2
VEGF signaling pathway	PIK3CA, SRC, KDR, PRKCA, MAPK14, PTGS2, PTK2, MAPK3
Arachidonic acid metabolism	PLA2G1B, ALOX5, EPHX2, TBXAS1, PLA2G2A, CYP2C19, PTGS2, PTGS1
Acute myeloid leukemia	CCND1, PIK3CA, MYC, STAT3, CD14, MPO, MTOR, MAPK3
Rheumatoid arthritis	CD86, JUN, FLT1, IFNG, MMP1, CD80, MMP3, FOS
Amoebiasis	IFNG, PIK3CA, NOS2, CASP3, COL4A4, PRKCA, CD14, PTK2
mTOR signaling pathway	PIK3CA, PTEN, PRKCA, SGK1, RHOA, MTOR, IGF1R, MAPK3
Apoptosis - multiple species	CASP8, CASP3, BCL2, BAX, XIAP, BIRC2, BCL2L1
Inflammatory bowel disease	IL4, JUN, IFNG, IFNGR1, STAT1, STAT3, IL2
Adipocytokine signaling pathway	NFKBIA, RXRA, STAT3, PTPN11, JAK2, PPARA, MTOR
PPAR signaling pathway	FABP1, FABP3, RXRA, MMP1, NR1H3, PPARG, PPARA
Complement and coagulation cascades	C3, F10, PLAU, C5AR1, BDKRB2, BDKRB1, F2
TGF-beta signaling pathway	CREBBP, IFNG, MYC, EP300, RHOA, TGFBR1, MAPK3
Protein digestion and absorption	DPP4, ACE2, PRSS1, MME, COL4A4, COL7A1, PRCP
Cholinergic synapse	PIK3CA, BCL2, PRKCA, FOS, JAK2, PIK3CG, MAPK3
Oocyte meiosis	CDK2, CDK1, PGR, MAPK14, AURKA, IGF1R, MAPK3
Vascular smooth muscle contraction	PLA2G1B, PLA2G2A, PRKCD, AGTR1, PRKCA, RHOA, MAPK3
Apelin signaling pathway	CCND1, NOS2, AGTR1, TGFBR1, MTOR, PIK3CG, MAPK3
Adrenergic signaling in cardiomyocytes	BCL2, AGTR1, PRKCA, AGTR2, MAPK14, PIK3CG, MAPK3
Allograft rejection	IL4, CD86, CD40, IFNG, CD80, IL2
Intestinal immune network for IgA production	IL4, CD86, CD40, CD80, CXCR4, IL2
Legionellosis	NFKBIA, C3, CASP8, CASP3, CASP1, CD14
Viral myocarditis	CD86, CD40, CASP8, CCND1, CASP3, CD80
Longevity regulating pathway	PIK3CA, BAX, PPARG, TP53, MTOR, IGF1R
Fc gamma R-mediated phagocytosis	SYK, PIK3CA, PRKCD, PRKCA, VAV1, MAPK3
Pancreatic secretion	PRSS1, PLA2G1B, CA2, PLA2G2A, PRKCA, RHOA
AMPK signaling pathway	CCND1, PIK3CA, PPARG, HMGCR, MTOR, IGF1R
Malaria	CD40, IFNG, CD81, TLR9, MET
Autoimmune thyroid disease	IL4, CD86, CD40, CD80, IL2
Amphetamine addiction	JUN, MAOB, PRKCA, FOS, DRD1
Mitophagy - animal	JUN, SRC, HIF1A, TP53, BCL2L1
Bacterial invasion of epithelial cells	PIK3CA, SRC, MET, PTK2, RHOA
Aldosterone-regulated sodium reabsorption	PIK3CA, PRKCA, SGK1, MAPK3
African trypanosomiasis	IFNG, TLR9, F2RL1, PRKCA
Graft-versus-host disease	CD86, IFNG, CD80, IL2
Type I diabetes mellitus	CD86, IFNG, CD80, IL2
Type II diabetes mellitus	PIK3CA, PRKCD, MTOR, MAPK3
Cocaine addiction	JUN, MAOB, DRD1, DRD2
Ovarian steroidogenesis	ALOX5, PTGS2, CYP19A1, IGF1R
Endocrine and other factor-regulated calcium reabsorption	VDR, BDKRB2, PRKCA, ESR1
